# Supplementary material for: Propagating annotations of molecular networks using in silico fragmentation
Source: PLoS Comput Biol. 2018 Apr 18;14(4):e1006089. doi: 10.1371/journal.pcbi.1006089 (PMC5927460; doi:10.1371/journal.pcbi.1006089)
Supplement: S1 Data — (XLS) [file pcbi.1006089.s002.xls]

## Sheet: consensus_nfirst1_20
S1 Table - Assessment of n first parameter impact on Consensus scoring
MetFrag	cluster.idx	Batch	c1	c2	c3	c4	c5	c6	c7	c8	c9	c10	c11	c12	c13	c14	c15	c16	c17	c18	c19	c20
8	1	1	8	8	8	8	8	8	8	2	3	3	3	3	3	3	3	3	3	3	3	3
1	2	1	1	1	1	1	1	1	1	1	1	1	1	1	1	1	1	1	1	1	1	1
1	3	1	1	1	1	1	1	1	1	1	1	1	1	1	1	1	1	1	1	1	1	1
25	5	1	25	25	25	25	25	25	25	25	25	25	25	25	25	25	25	25	25	25	25	25
13	6	1	13	13	13	13	13	13	13	13	13	13	13	13	6	7	8	8	8	8	8	8
7	7	1	7	7	7	7	7	7	6	6	6	5	5	5	5	5	5	6	6	6	6	6
18	8	1	18	18	18	18	18	18	18	18	18	18	18	18	18	18	18	18	18	5	5	5
9	9	1	9	9	9	9	9	9	9	9	3	4	4	4	4	4	4	4	4	4	4	3
5	10	1	5	5	5	5	1	2	1	1	1	1	1	1	1	1	1	1	1	1	1	1
12	11	1	12	12	12	12	12	12	12	12	12	12	12	2	2	2	2	4	4	1	1	1
27	13	1	27	27	27	27	27	27	27	27	27	27	27	27	27	27	27	27	27	27	27	27
2	14	1	2	2	2	2	2	2	2	2	2	2	2	2	2	2	2	2	2	2	2	2
1	15	1	1	2	2	2	2	2	2	2	2	2	2	2	2	2	2	3	3	3	4	5
4	16	1	4	4	4	2	2	2	2	2	2	2	2	2	2	2	2	2	2	2	2	2
1	17	1	1	1	1	1	1	1	1	1	1	1	1	1	1	1	1	1	1	1	1	1
1	18	1	1	1	1	1	1	1	1	1	1	1	1	1	1	1	1	1	1	1	1	1
3	19	1	3	3	2	2	2	2	2	2	2	2	2	2	2	2	2	2	2	2	2	2
14	20	1	14	14	14	14	14	14	14	14	14	14	14	14	14	11	13	14	15	16	17	18
5	21	1	5	5	5	5	4	4	4	4	4	4	4	4	4	4	4	4	4	4	4	5
15	22	1	15	15	15	15	15	15	15	15	15	15	15	15	15	15	5	5	5	5	6	7
8	23	1	8	8	8	8	8	8	8	8	9	10	11	11	12	13	14	15	16	17	18	19
1	25	1	1	2	3	3	4	2	2	3	3	3	3	3	3	3	3	3	3	3	3	3
13	26	1	13	13	13	13	13	13	13	13	13	13	13	13	1	1	2	3	3	3	3	3
9	27	1	9	9	9	9	9	9	9	9	5	6	6	6	6	7	8	8	8	8	8	8
4	28	1	4	4	4	1	1	1	1	1	1	1	1	1	1	1	1	1	1	1	1	1
5	30	1	5	5	5	5	5	6	6	6	6	6	6	6	6	6	6	6	6	6	6	6
1	31	1	1	1	1	1	1	1	1	1	1	1	1	1	1	1	1	1	1	1	1	1
10	32	1	10	10	10	10	10	10	10	10	10	8	8	8	8	8	8	8	8	8	8	8
3	35	1	3	3	1	1	1	1	1	1	1	1	1	1	1	1	1	1	1	1	1	1
1	36	1	1	1	1	1	1	1	1	1	1	1	1	1	1	1	1	1	1	1	1	1
1	37	1	1	1	1	1	1	1	1	1	1	1	1	1	1	1	1	1	1	1	1	1
1	38	1	1	1	1	1	1	1	1	1	1	1	1	1	1	1	1	1	1	1	1	1
2	39	1	2	1	1	1	1	1	1	1	1	1	1	1	1	1	1	1	1	1	1	1
4	40	1	4	4	4	3	3	3	3	3	3	3	3	3	3	3	3	3	3	3	3	3
1	41	1	1	1	1	1	1	1	1	1	1	1	1	1	1	1	1	1	1	1	1	1
1	42	1	1	2	2	2	2	2	2	2	2	2	2	2	2	2	2	2	2	2	2	2
1	43	1	1	1	1	1	1	1	1	1	1	1	1	1	1	1	1	1	1	1	1	1
18	44	1	18	18	18	18	18	18	18	18	18	18	18	18	18	18	18	18	18	10	11	12
1	46	1	1	1	1	1	1	1	1	1	1	1	1	1	1	1	1	1	1	1	1	1
18	47	1	18	18	18	18	18	18	18	18	18	18	18	18	18	18	18	18	18	1	1	1
6	48	1	6	6	6	6	6	6	6	7	8	8	8	9	9	9	9	9	9	9	9	9
1	49	1	1	1	1	1	1	1	1	1	1	1	1	1	1	1	1	1	1	1	1	1
1	50	1	1	1	1	1	1	1	1	1	1	1	1	1	1	1	1	1	1	1	1	1
1	51	1	1	2	2	2	2	2	2	2	2	2	2	2	2	2	2	2	2	2	2	2
7	52	1	7	7	7	7	7	7	2	2	2	2	2	2	2	2	2	2	2	2	2	2
2	53	1	2	1	2	2	2	2	2	2	2	2	2	2	2	2	2	2	2	2	2	2
3	54	1	3	3	1	1	1	1	1	1	1	1	1	1	1	1	1	1	1	1	1	1
6	55	1	6	6	6	6	6	6	7	4	4	4	6	6	6	13	14	15	16	17	17	17
9	56	1	9	9	9	9	9	9	9	9	1	3	3	3	3	3	3	3	3	3	3	3
1	57	1	1	1	1	1	1	1	1	1	1	1	1	1	1	1	1	1	1	1	1	1
33	58	1	33	33	33	33	33	33	33	33	33	33	33	33	33	33	33	33	33	33	33	33
6	59	1	6	6	6	6	6	2	2	1	1	1	1	1	1	1	1	1	1	1	2	1
20	60	1	20	20	20	20	20	20	20	20	20	20	20	20	20	20	20	20	20	20	20	1
39	61	1	39	39	39	39	39	39	39	39	39	39	39	39	39	39	39	39	39	39	39	39
17	62	1	17	17	17	17	17	17	17	17	17	17	17	17	17	17	17	17	1	1	1	1
22	63	1	22	22	22	22	22	22	22	22	22	22	22	22	22	22	22	22	22	22	22	22
3	64	1	3	3	3	3	3	3	4	4	4	4	4	4	4	4	5	3	3	3	3	3
6	65	1	6	6	6	6	6	5	6	2	1	2	2	2	2	2	2	2	2	2	2	2
21	66	1	21	21	21	21	21	21	21	21	21	21	21	21	21	21	21	21	21	21	21	21
22	67	1	22	22	22	22	22	22	22	22	22	22	22	22	22	22	22	22	22	22	22	22
16	68	1	16	16	16	16	16	16	16	16	16	16	16	16	16	16	16	3	3	3	3	3
40	69	1	40	40	40	40	40	40	40	40	40	40	40	40	40	40	40	40	40	40	40	40
18	70	1	18	18	18	18	18	18	18	18	18	18	18	18	18	18	18	18	18	7	7	7
1	71	1	1	1	1	1	1	1	1	1	1	1	1	1	1	1	1	1	1	1	1	1
56	72	1	56	56	56	56	56	56	56	56	56	56	56	56	56	56	56	56	56	56	56	56
9	73	1	9	9	9	9	9	9	9	9	1	1	1	1	2	3	6	7	8	9	10	11
20	74	1	20	20	20	20	20	20	20	20	20	20	20	20	20	20	20	20	20	20	20	18
11	75	1	11	11	11	11	11	11	11	11	11	11	1	1	1	1	1	1	2	2	2	2
22	76	1	22	22	22	22	22	22	22	22	22	22	22	22	22	22	22	22	22	22	22	22
3	77	1	3	3	1	1	1	1	1	1	1	1	1	1	1	1	1	1	1	1	1	1
6	78	1	6	6	6	6	6	2	2	2	2	2	2	2	2	2	2	2	2	2	2	2
5	80	1	5	5	5	5	3	5	4	4	5	5	5	5	5	5	7	7	7	8	8	8
14	81	1	14	14	14	14	14	14	14	14	14	14	14	14	14	6	6	7	8	9	9	9
6	83	1	6	6	6	6	6	6	6	2	2	2	2	2	2	2	2	2	2	2	2	2
5	84	1	5	5	5	5	1	1	1	1	1	1	1	1	1	1	1	1	1	1	1	1
66	85	1	66	66	66	66	66	66	66	66	66	66	66	66	66	66	66	66	66	66	66	66
24	86	1	24	24	24	24	24	24	24	24	24	24	24	24	24	24	24	24	24	24	24	24
65	87	1	65	65	65	65	65	65	65	65	65	65	65	65	65	65	65	65	65	65	65	65
3	89	1	3	3	3	4	5	5	5	5	6	6	6	6	6	6	6	6	6	6	6	6
11	90	1	11	11	11	11	11	11	11	11	11	11	2	2	2	2	2	2	2	2	2	2
71	91	1	71	71	71	71	71	71	71	71	71	71	71	71	71	71	71	71	71	71	71	71
123	92	1	123	123	123	123	123	123	123	123	123	123	123	123	123	123	123	123	123	123	123	123
39	93	1	39	39	39	39	39	39	39	39	39	39	39	39	39	39	39	39	39	39	39	39
95	94	1	95	95	95	95	95	95	95	95	95	95	95	95	95	95	95	95	95	95	95	95
44	96	1	44	44	44	44	44	44	44	44	44	44	44	44	44	44	44	44	44	44	44	44
1	97	1	1	1	1	1	1	1	1	1	1	1	1	1	1	1	1	1	1	1	1	1
31	98	1	31	31	31	31	31	31	31	31	31	31	31	31	31	31	31	31	31	31	31	31
2	100	1	2	1	1	1	1	1	1	1	1	1	1	1	1	1	1	1	1	1	1	1
1	101	1	1	1	1	1	1	1	1	1	1	1	1	1	1	1	1	1	1	1	1	1
2	102	1	2	1	1	1	1	1	1	1	2	2	2	2	2	2	2	2	2	2	2	2
1	103	1	1	1	1	1	1	1	1	1	1	1	1	1	1	1	1	1	1	1	1	1
3	104	1	3	3	3	3	3	3	3	3	3	3	3	3	3	3	4	4	4	4	4	5
2	105	1	2	2	2	2	1	1	1	1	1	1	1	1	1	1	1	1	1	1	1	1
31	107	1	31	31	31	31	31	31	31	31	31	31	31	31	31	31	31	31	31	31	31	31
6	110	1	6	6	6	6	6	4	4	4	4	4	4	4	4	4	4	4	5	5	5	5
2	111	1	2	1	1	1	1	1	1	1	1	1	1	1	1	1	1	1	1	1	1	1
7	112	1	7	7	7	7	7	7	1	1	1	1	2	1	1	1	1	1	1	1	1	1
16	113	1	16	16	16	16	16	16	16	16	16	16	16	16	16	16	16	3	3	3	3	3
35	114	1	35	35	35	35	35	35	35	35	35	35	35	35	35	35	35	35	35	35	35	35
27	115	1	27	27	27	27	27	27	27	27	27	27	27	27	27	27	27	27	27	27	27	27
45	116	1	45	45	45	45	45	45	45	45	45	45	45	45	45	45	45	45	45	45	45	45
40	117	1	40	40	40	40	40	40	40	40	40	40	40	40	40	40	40	40	40	40	40	40
18	118	1	18	18	18	18	18	18	18	18	18	18	18	18	18	18	18	18	18	10	10	10
7	119	1	7	7	7	7	7	7	4	5	5	5	6	6	6	6	6	6	6	6	6	6
46	120	1	46	46	46	46	46	46	46	46	46	46	46	46	46	46	46	46	46	46	46	46
6	121	1	6	6	6	6	6	1	1	2	2	2	2	2	2	2	2	2	2	2	2	2
1	122	1	1	2	2	2	5	2	2	2	2	2	2	2	2	2	2	2	2	2	2	2
18	123	1	18	18	18	18	18	18	18	18	18	18	18	18	18	18	18	18	18	12	12	14
2	124	1	2	1	1	1	1	1	1	1	1	1	1	2	1	1	1	1	1	1	1	1
6	125	1	6	6	6	6	6	3	1	1	1	1	1	1	1	1	1	1	1	1	1	1
13	126	1	13	13	13	13	13	13	13	13	13	13	13	13	6	6	6	6	6	6	6	6
1	127	1	1	1	1	1	1	1	1	1	1	1	1	1	1	1	1	1	1	1	1	1
19	128	1	19	19	19	19	19	19	19	19	19	19	19	19	19	19	19	19	19	19	10	10
33	129	1	33	33	33	33	33	33	33	33	33	33	33	33	33	33	33	33	33	33	33	33
13	130	1	13	13	13	13	13	13	13	13	13	13	13	13	1	1	1	1	1	1	1	1
1	131	1	1	1	1	1	1	1	1	1	1	1	1	1	1	1	1	1	1	1	1	1
27	133	1	27	27	27	27	27	27	27	27	27	27	27	27	27	27	27	27	27	27	27	27
4	134	1	4	4	4	4	4	4	4	4	4	4	4	4	4	4	4	4	4	4	4	4
10	135	1	10	10	10	10	10	10	10	10	10	10	10	10	10	10	7	8	6	6	6	6
1	136	1	1	1	1	1	1	1	1	1	1	1	1	1	1	1	1	1	1	1	1	1
2	137	1	2	2	3	4	4	4	4	3	3	3	3	3	3	3	3	3	3	4	4	4
5	138	1	5	5	5	5	5	5	5	6	6	6	11	12	13	14	15	16	17	18	19	19
1	139	1	1	1	1	1	1	1	1	1	1	1	1	1	1	1	1	1	1	1	1	1
1	140	1	1	1	2	2	2	2	3	3	4	5	5	6	7	8	8	9	10	11	12	12
1	141	1	1	1	1	1	1	1	1	1	1	1	1	1	1	1	1	1	1	1	1	1
3	142	1	3	3	1	1	1	1	1	1	1	1	1	1	1	1	1	1	1	1	1	1
3	143	1	3	3	3	3	3	3	3	6	8	6	7	8	9	1	1	1	1	1	1	1
12	144	1	12	12	12	12	12	12	12	12	12	12	12	1	2	2	2	2	2	2	2	2
1	145	1	1	1	1	1	1	1	1	1	1	1	1	1	1	1	1	1	1	1	1	1
5	146	1	5	5	5	5	1	1	2	1	1	1	1	1	1	1	1	1	1	2	2	2
23	147	1	23	23	23	23	23	23	23	23	23	23	23	23	23	23	23	23	23	23	23	23
3	148	1	3	3	1	1	1	1	1	1	1	1	1	1	1	1	1	1	1	1	1	1
5	149	1	5	5	5	5	1	1	1	1	1	1	1	1	1	1	1	1	1	1	1	1
2	150	1	2	1	1	1	1	1	1	1	1	1	1	1	1	1	1	1	1	1	1	1
60	151	1	60	60	60	60	60	60	60	60	60	60	60	60	60	60	60	60	60	60	60	60
17	152	1	17	17	17	17	17	17	17	17	17	17	17	17	17	17	17	17	1	1	1	1
4	153	1	4	4	4	1	1	1	1	1	1	1	1	1	1	1	1	1	1	1	1	1
8	154	1	8	8	8	8	8	8	8	1	1	1	1	1	1	1	1	1	1	1	1	1
2	155	1	2	2	2	2	1	1	1	1	1	1	1	1	1	1	1	1	1	2	2	2
37	156	1	37	37	37	37	37	37	37	37	37	37	37	37	37	37	37	37	37	37	37	37
3	157	1	3	3	1	1	1	1	1	1	1	1	1	1	1	1	1	1	1	1	1	1
2	158	1	2	1	1	1	1	1	1	1	1	1	1	1	1	1	1	1	1	1	1	1
4	159	1	4	4	4	3	3	3	3	3	3	3	3	3	3	3	3	3	3	3	3	3
6	160	1	6	6	6	6	6	1	1	1	1	1	2	2	2	2	2	2	2	2	2	2
4	161	1	4	4	4	3	3	3	3	3	3	3	3	3	3	3	3	3	3	3	3	3
4	162	1	4	4	4	4	4	4	4	4	4	4	4	4	4	4	4	4	4	4	4	4
2	163	1	2	1	1	1	1	1	1	1	1	1	1	1	1	1	1	1	1	1	1	1
10	164	1	10	10	10	10	10	10	10	10	10	2	2	2	2	2	2	2	2	2	2	2
2	165	1	2	1	1	1	1	1	1	1	1	1	1	1	1	1	1	1	1	1	1	1
9	166	1	9	9	9	9	9	9	9	9	3	3	3	3	3	4	3	3	3	3	3	3
4	167	1	4	4	4	1	1	1	1	1	1	1	1	1	1	1	1	1	1	1	1	1
6	168	1	6	6	6	6	6	2	1	1	1	1	1	1	1	1	1	1	1	1	1	1
13	169	1	13	13	13	13	13	13	13	13	13	13	13	13	1	1	1	1	1	1	1	1
17	170	1	17	17	17	17	17	17	17	17	17	17	17	17	17	17	17	17	1	1	1	1
13	171	1	13	13	13	13	13	13	13	13	13	13	13	13	1	1	1	1	1	1	1	1
27	172	1	27	27	27	27	27	27	27	27	27	27	27	27	27	27	27	27	27	27	27	27
8	173	1	8	8	8	8	8	8	8	4	4	4	4	4	4	4	4	4	4	4	4	4
5	174	1	5	5	5	5	1	1	1	1	1	1	1	1	1	1	1	2	2	2	2	2
16	175	1	16	16	16	16	16	16	16	16	16	16	16	16	16	16	16	1	1	1	1	1
41	176	1	41	41	41	41	41	41	41	41	41	41	41	41	41	41	41	41	41	41	41	41
3	177	1	3	3	2	1	1	1	1	1	1	1	1	1	1	1	1	1	1	1	1	1
14	178	1	14	14	14	14	14	14	14	14	14	14	14	14	14	1	1	1	1	1	1	1
4	179	1	4	4	4	1	1	1	1	1	1	1	1	1	1	1	1	1	1	1	1	1
4	180	1	4	4	4	2	2	2	2	2	2	2	2	2	2	2	2	2	2	2	2	2
4	181	1	4	4	4	3	3	3	3	3	3	3	3	3	3	3	3	3	3	3	3	3
1	182	1	1	2	2	2	2	2	2	2	2	2	2	2	2	2	2	2	2	2	2	2
6	183	1	6	6	6	6	6	2	2	2	2	2	2	2	2	2	2	2	2	2	2	2
1	184	1	1	1	2	1	1	1	1	1	1	1	1	1	1	1	1	1	1	1	1	1
4	185	1	4	4	4	1	1	1	1	1	1	1	1	1	1	1	1	1	1	1	1	1
1	186	1	1	1	1	1	1	1	1	1	1	1	1	1	1	1	1	1	1	1	1	1
20	187	1	20	20	20	20	20	20	20	20	20	20	20	20	20	20	20	20	20	20	20	3
15	188	1	15	15	15	15	15	15	15	15	15	15	15	15	15	15	1	1	1	1	1	1
9	189	1	9	9	9	9	9	9	9	9	1	1	1	1	1	1	1	1	1	1	1	1
1	190	1	1	1	1	1	1	1	1	1	1	1	1	1	1	1	1	1	1	1	1	1
2	191	1	2	1	1	1	1	1	1	1	1	1	1	1	1	1	1	1	1	1	1	1
3	192	1	3	3	3	3	3	3	3	3	3	3	3	3	3	3	3	3	3	3	3	3
2	193	1	2	2	2	2	2	2	2	2	2	2	2	2	2	2	2	2	2	2	2	2
1	194	1	1	1	1	1	1	1	1	1	1	1	1	1	1	1	1	1	1	1	1	1
1	195	1	1	1	1	1	1	1	1	1	1	1	1	1	1	1	1	1	1	1	1	1
1	196	1	1	2	2	2	2	2	2	2	2	2	2	2	2	2	2	2	2	2	2	2
4	197	1	4	4	4	1	1	1	1	1	1	1	1	1	1	1	1	1	1	1	1	1
4	198	1	4	4	4	4	4	4	4	4	4	4	4	4	4	4	4	4	4	4	4	4
35	199	1	35	35	35	35	35	35	35	35	35	35	35	35	35	35	35	35	35	35	35	35
3	200	1	3	3	1	1	1	1	1	1	1	1	1	1	1	1	1	1	1	1	1	1
1	201	1	1	1	1	1	1	1	1	1	1	1	1	1	1	1	1	1	1	1	1	1
5	202	1	5	5	5	5	1	1	1	1	1	1	1	1	1	1	1	1	1	1	1	1
33	203	1	33	33	33	33	33	33	33	33	33	33	33	33	33	33	33	33	33	33	33	33
1	204	1	1	1	1	1	1	1	1	1	1	1	1	1	1	1	1	1	1	1	1	1
4	205	1	4	4	4	4	4	4	2	4	4	4	4	4	4	4	4	4	4	4	4	4
2	206	1	2	1	1	1	2	2	2	2	2	2	2	2	2	2	2	2	2	2	2	2
5	207	1	5	5	5	5	1	1	1	1	1	1	1	1	1	1	1	1	1	1	1	1
4	208	1	4	4	4	1	1	1	1	1	1	1	1	1	1	1	1	1	1	1	1	1
18	209	1	18	18	18	18	18	18	18	18	18	18	18	18	18	18	18	18	18	2	2	2
8	210	1	8	8	8	8	8	8	8	2	2	2	2	2	2	2	2	2	2	2	2	2
1	211	1	1	1	1	1	2	2	2	2	2	2	2	2	2	2	2	2	2	2	2	2
2	212	1	2	1	1	2	2	3	3	4	5	5	5	5	5	5	5	5	5	5	5	5
2	213	1	2	1	1	1	1	2	2	2	2	2	2	2	2	2	2	2	2	2	2	2
19	214	1	19	19	19	19	19	19	19	19	19	19	19	19	19	19	19	19	19	19	1	1
4	215	1	4	4	4	1	1	1	1	1	1	1	1	1	1	1	1	1	1	1	1	1
3	216	1	3	3	2	2	2	2	3	4	4	4	4	4	4	4	4	4	4	4	4	4
5	217	1	5	5	5	5	1	1	1	1	1	1	1	1	1	1	1	1	1	1	1	1
2	218	1	2	1	1	1	1	1	2	3	3	3	3	3	3	3	3	3	3	3	3	3
12	219	1	12	12	12	12	12	12	12	12	12	12	12	10	11	11	11	11	12	12	13	14
1	220	1	1	2	3	3	3	3	3	3	3	3	3	3	3	3	3	3	3	3	3	3
3	221	1	3	3	1	1	1	1	1	1	1	1	1	1	1	1	1	1	1	1	1	1
1	222	1	1	1	1	1	1	1	1	1	1	1	1	1	1	1	1	1	1	1	1	1
1	223	1	1	1	1	1	1	2	2	2	2	2	2	2	2	2	2	2	2	2	2	2
3	224	1	3	3	1	1	1	1	1	1	1	1	1	1	1	1	1	1	1	1	1	1
1	225	1	1	2	2	2	2	2	2	2	2	2	2	2	2	2	2	2	2	2	2	2
1	226	1	1	1	1	1	1	1	1	1	1	1	1	1	1	1	1	1	1	1	1	1
11	227	1	11	11	11	11	11	11	11	11	11	11	1	1	1	1	1	1	1	1	1	1
3	228	1	3	3	3	4	4	4	4	4	4	4	4	4	4	4	4	4	4	4	4	4
1	229	1	1	1	1	1	1	1	1	1	1	1	1	1	1	1	1	1	1	1	1	1
2	230	1	2	1	1	1	1	1	1	1	1	1	1	1	1	1	1	1	1	1	1	1
6	231	1	6	6	6	6	6	1	1	2	2	2	2	2	2	2	2	2	2	2	2	2
18	232	1	18	18	18	18	18	18	18	18	18	18	18	18	18	18	18	18	18	5	5	5
1	233	1	1	1	1	1	1	1	1	1	1	1	1	1	1	1	1	1	1	1	1	1
29	234	1	29	29	29	29	29	29	29	29	29	29	29	29	29	29	29	29	29	29	29	29
2	235	1	2	1	1	1	2	2	2	1	1	1	1	1	1	1	1	1	1	1	1	1
6	236	1	6	6	6	6	6	4	4	6	6	6	6	6	6	6	6	6	6	6	6	6
4	237	1	4	4	4	2	3	2	2	4	4	3	3	3	3	3	3	3	3	3	3	3
1	238	1	1	1	1	1	1	1	1	1	1	1	1	1	1	1	1	1	1	1	1	1
1	239	1	1	1	2	2	1	1	1	1	1	1	1	1	1	1	1	1	2	2	2	2
40	240	1	40	40	40	40	40	40	40	40	40	40	40	40	40	40	40	40	40	40	40	40
28	241	1	28	28	28	28	28	28	28	28	28	28	28	28	28	28	28	28	28	28	28	28
6	242	1	6	6	6	6	6	1	2	2	2	2	2	2	2	2	2	2	2	2	2	2
4	243	1	4	4	4	4	4	4	4	4	4	4	4	4	4	4	4	4	4	4	4	4
11	244	1	11	11	11	11	11	11	11	11	11	11	2	2	2	2	2	2	2	2	2	2
2	245	1	2	1	1	1	1	1	1	1	1	1	1	1	1	1	1	1	1	1	1	1
2	246	1	2	2	2	2	2	4	2	2	2	2	2	2	2	2	2	2	2	2	2	2
1	247	1	1	1	1	1	1	1	1	1	1	1	1	1	1	1	1	1	1	1	1	1
8	248	1	8	8	8	8	8	8	8	1	1	1	1	2	2	2	2	2	2	2	2	2
2	249	1	2	2	2	2	2	2	2	2	2	2	2	2	2	2	2	2	2	2	2	2
2	250	1	2	2	2	2	2	2	2	2	2	2	2	2	2	2	2	2	2	2	2	2
1	251	1	1	2	2	2	2	2	2	2	2	2	2	2	2	2	2	2	2	2	2	2
1	252	1	1	1	2	3	1	1	3	3	3	3	3	3	3	3	3	3	3	3	3	3
2	253	1	2	2	2	2	2	2	2	2	2	2	2	2	2	2	2	2	2	2	2	2
9	254	1	9	9	9	9	9	9	9	9	2	2	2	2	2	2	2	2	2	2	2	2
1	255	1	1	2	2	2	2	2	2	2	2	2	2	2	2	2	2	2	2	2	2	2
17	256	1	17	17	17	17	17	17	17	17	17	17	17	17	17	17	17	17	2	2	2	2
2	257	1	2	1	1	1	2	2	2	2	2	2	2	2	2	2	2	2	2	2	2	2
1	258	1	1	1	1	1	1	1	1	1	1	1	1	1	1	1	1	1	1	1	1	1
6	259	1	6	6	6	6	6	4	4	4	4	4	4	4	4	4	4	4	4	4	4	4
1	260	1	1	1	2	2	2	2	2	2	2	2	2	2	2	2	2	2	2	2	2	2
1	261	1	1	1	2	2	2	2	2	2	2	2	2	2	2	2	2	2	2	2	2	2
1	262	1	1	2	2	2	2	2	2	2	2	2	2	2	2	2	2	2	2	2	2	2
2	263	1	2	1	1	1	1	1	1	1	1	1	1	1	1	1	1	1	1	1	1	1
1	264	1	1	1	1	1	1	1	1	1	1	1	1	1	1	1	1	1	1	1	1	1
1	265	1	1	1	1	1	1	1	1	1	1	1	1	1	1	1	1	1	1	1	1	1
3	266	1	3	3	2	2	2	2	2	2	2	2	2	2	2	2	2	2	2	2	2	2
1	267	1	1	1	1	1	1	2	2	2	2	2	2	2	2	2	2	2	2	2	2	2
1	268	1	1	1	1	1	1	1	1	1	1	1	1	1	1	1	1	1	1	1	1	1
1	269	1	1	1	1	1	1	1	1	1	1	1	1	1	1	1	1	1	1	1	1	1
1	270	1	1	2	2	2	2	2	2	2	2	2	2	2	2	2	2	2	2	2	2	2
2	271	1	2	1	1	1	1	1	1	1	1	1	1	1	1	1	1	1	1	1	1	1
1	272	1	1	1	1	1	1	1	1	1	1	1	1	1	1	1	1	1	1	1	1	1
2	273	1	2	2	2	2	2	2	2	2	2	2	2	2	2	2	2	2	2	2	2	2
1	274	1	1	1	1	1	1	1	1	1	1	1	1	1	1	1	1	1	1	1	1	1
1	275	1	1	1	1	1	1	1	1	1	1	1	1	1	1	1	1	1	1	1	1	1
11	276	1	11	11	11	11	11	11	11	11	11	11	2	2	2	3	3	3	3	3	3	3
1	277	1	1	1	1	1	1	1	1	1	1	1	1	1	1	1	1	1	1	1	1	1
1	278	1	1	1	1	1	1	1	1	1	1	1	1	1	1	1	1	1	1	1	1	1
1	279	1	1	1	1	1	1	1	1	1	1	1	1	1	1	1	1	1	1	1	1	1
2	280	1	2	2	2	2	2	1	1	1	1	1	1	1	1	1	1	1	1	1	1	1
27	281	1	27	27	27	27	27	27	27	27	27	27	27	27	27	27	27	27	27	27	27	27
8	282	1	8	8	8	8	8	8	8	8	8	8	9	10	11	11	11	11	11	11	11	11
1	283	1	1	1	1	1	1	1	1	1	1	1	1	1	1	1	1	1	1	1	1	1
10	284	1	10	10	10	10	10	10	10	10	10	5	5	5	3	3	3	3	3	3	3	3
3	285	1	3	3	2	2	2	2	2	2	2	2	2	2	2	2	2	2	2	2	2	2
1	286	1	1	1	1	1	1	1	1	1	1	1	1	1	1	1	1	1	1	1	1	1
4	288	1	4	4	4	1	1	1	1	1	1	1	1	1	1	1	1	1	1	1	1	1
2	289	1	2	2	2	2	2	2	2	2	2	2	2	2	2	2	2	2	2	2	2	2
22	290	1	22	22	22	22	22	22	22	22	22	22	22	22	22	22	22	22	22	22	22	22
9	291	1	9	9	9	9	9	9	9	9	3	3	3	3	3	3	3	3	3	3	3	3
48	292	1	48	48	48	48	48	48	48	48	48	48	48	48	48	48	48	48	48	48	48	48
2	293	1	2	1	2	2	3	2	2	2	2	2	2	2	2	2	2	2	2	2	2	2
1	294	1	1	2	2	2	3	4	5	5	5	5	5	5	5	5	5	5	5	5	5	5
1	295	1	1	1	1	1	1	1	1	1	1	1	1	1	1	1	1	1	1	1	1	1
4	296	1	4	4	4	1	1	1	1	1	1	1	1	1	1	1	1	1	1	1	1	1
9	297	1	9	9	9	9	9	9	9	9	5	2	2	2	1	1	1	1	2	2	2	2
7	298	1	7	7	7	7	7	7	1	1	1	1	1	1	1	1	1	1	1	1	1	1
205	299	1	205	205	205	205	205	205	205	205	205	205	205	205	205	205	205	205	205	205	205	205
71	300	1	71	71	71	71	71	71	71	71	71	71	71	71	71	71	71	71	71	71	71	71
64	301	1	64	64	64	64	64	64	64	64	64	64	64	64	64	64	64	64	64	64	64	64
49	302	1	49	49	49	49	49	49	49	49	49	49	49	49	49	49	49	49	49	49	49	49
50	303	1	50	50	50	50	50	50	50	50	50	50	50	50	50	50	50	50	50	50	50	50
112	304	1	112	112	112	112	112	112	112	112	112	112	112	112	112	112	112	112	112	112	112	112
19	305	1	19	19	19	19	19	19	19	19	19	19	19	19	19	19	19	19	19	19	10	10
90	306	1	90	90	90	90	90	90	90	90	90	90	90	90	90	90	90	90	90	90	90	90
8	307	1	8	8	8	8	8	8	8	5	5	5	5	5	6	8	8	9	10	12	13	14
19	308	1	19	19	19	19	19	19	19	19	19	19	19	19	19	19	19	19	19	19	9	9
15	309	1	15	15	15	15	15	15	15	15	15	15	15	15	15	15	10	10	11	11	13	13
25	310	1	25	25	25	25	25	25	25	25	25	25	25	25	25	25	25	25	25	25	25	25
4	312	1	4	4	4	1	1	1	1	1	1	1	1	1	1	1	1	1	1	1	1	1
10	313	1	10	10	10	10	10	10	10	10	10	10	10	10	10	10	10	10	10	10	10	10
2	315	1	2	1	1	1	1	1	1	1	1	1	1	1	1	1	1	1	1	1	1	1
43	316	1	43	43	43	43	43	43	43	43	43	43	43	43	43	43	43	43	43	43	43	43
2	317	1	2	2	2	2	2	2	2	2	2	2	4	4	5	6	6	6	6	6	6	6
14	318	1	14	14	14	14	14	14	14	14	14	14	14	14	14	5	7	7	7	7	7	7
12	319	1	12	12	12	12	12	12	12	12	12	12	12	11	11	11	11	11	11	11	11	11
2	320	1	2	1	1	1	1	1	1	1	1	1	2	2	2	2	2	2	2	3	3	3
1	321	1	1	1	2	2	2	3	3	1	1	1	2	2	2	2	3	3	4	4	5	7
33	322	1	33	33	33	33	33	33	33	33	33	33	33	33	33	33	33	33	33	33	33	33
8	323	1	8	8	8	8	8	8	8	1	2	2	2	3	4	4	5	5	5	6	8	8
1	324	1	1	2	3	4	5	2	2	2	2	2	2	2	2	2	2	2	2	2	2	2
5	325	1	5	5	5	5	3	4	3	3	2	2	2	2	2	2	2	2	2	2	2	2
5	328	1	5	5	5	5	2	2	2	2	2	2	2	3	3	4	4	4	7	7	7	8
6	329	1	6	6	6	6	6	6	6	6	6	6	6	6	6	6	6	6	6	6	6	6
1	331	1	1	1	1	1	1	1	1	1	1	1	1	1	1	1	1	1	1	1	1	1
11	332	1	11	11	11	11	11	11	11	11	11	11	9	10	10	10	10	10	10	8	8	8
35	333	1	35	35	35	35	35	35	35	35	35	35	35	35	35	35	35	35	35	35	35	35
2	334	1	2	2	3	4	5	6	7	8	9	10	11	12	13	14	15	16	17	18	19	20
7	335	1	7	7	7	7	7	7	1	1	1	1	1	1	1	1	1	1	1	1	1	1
9	336	1	9	9	9	9	9	9	9	9	1	1	1	1	1	1	1	2	2	2	2	2
5	337	1	5	5	5	5	1	2	2	2	2	2	2	2	2	2	2	2	2	2	2	2
29	338	1	29	29	29	29	29	29	29	29	29	29	29	29	29	29	29	29	29	29	29	29
3	339	1	3	3	1	1	1	1	1	1	1	1	1	1	1	1	1	1	1	1	1	1
1	340	1	1	1	1	1	1	1	1	1	1	1	1	1	1	1	1	1	1	1	1	1
1	341	1	1	1	1	1	1	1	1	1	1	1	1	1	1	1	1	1	1	1	1	1
2	342	1	2	2	2	2	2	2	2	2	2	2	2	2	2	2	2	2	2	2	2	2
10	343	1	10	10	10	10	10	10	10	10	10	5	5	5	5	5	5	5	5	5	5	5
10	344	1	10	10	10	10	10	10	10	10	10	2	2	2	2	2	2	2	2	2	2	2
1	345	1	1	1	1	1	1	1	1	1	1	1	1	1	1	1	1	1	1	1	1	1
1	346	1	1	1	1	1	1	1	1	1	1	1	1	1	1	1	1	1	1	1	1	1
1	348	1	1	1	1	1	1	1	1	1	2	2	2	2	2	2	2	3	3	3	3	3
1	349	1	1	1	1	1	1	1	1	1	1	1	1	1	1	1	1	1	1	1	1	1
14	350	1	14	14	14	14	14	14	14	14	14	14	14	14	14	8	8	8	8	8	8	8
1	351	1	1	2	3	4	4	5	5	5	5	5	5	5	5	5	5	5	5	5	5	5
8	352	1	8	8	8	8	8	8	8	4	4	3	3	3	3	3	3	3	3	3	3	3
4	353	1	4	4	4	3	4	4	5	5	2	3	3	3	3	3	3	3	3	3	3	3
23	354	1	23	23	23	23	23	23	23	23	23	23	23	23	23	23	23	23	23	23	23	23
3	355	1	3	3	3	3	3	3	3	3	3	3	3	3	3	3	3	3	3	3	3	3
4	356	1	4	4	4	1	2	2	3	5	5	5	5	6	6	6	7	9	9	10	10	10
3	357	1	3	3	1	1	2	3	3	4	5	5	6	6	6	6	6	6	6	6	6	6
53	358	1	53	53	53	53	53	53	53	53	53	53	53	53	53	53	53	53	53	53	53	53
1	359	1	1	1	1	1	1	1	1	1	1	1	1	1	1	1	1	1	1	1	1	1
2	361	1	2	2	2	2	2	2	2	2	2	2	2	2	2	2	2	2	2	2	2	2
79	363	1	79	79	79	79	79	79	79	79	79	79	79	79	79	79	79	79	79	79	79	79
6	364	1	6	6	6	6	6	1	1	1	1	1	1	1	1	1	1	1	1	1	1	1
3	365	1	3	3	1	1	1	1	2	2	2	2	2	2	2	2	2	2	2	2	2	2
22	366	1	22	22	22	22	22	22	22	22	22	22	22	22	22	22	22	22	22	22	22	22
13	367	1	13	13	13	13	13	13	13	13	13	13	13	13	3	1	1	1	1	1	1	1
5	368	1	5	5	5	5	2	2	2	2	2	2	2	2	2	2	2	2	2	2	2	2
3	369	1	3	3	2	2	3	3	3	3	3	3	3	3	3	3	3	3	3	3	3	3
3	370	1	3	3	2	1	3	3	4	3	1	2	2	2	2	2	2	2	2	2	2	2
73	371	1	73	73	73	73	73	73	73	73	73	73	73	73	73	73	73	73	73	73	73	73
15	372	1	15	15	15	15	15	15	15	15	15	15	15	15	15	15	3	3	4	2	2	2
19	373	1	19	19	19	19	19	19	19	19	19	19	19	19	19	19	19	19	19	19	14	16
16	374	1	16	16	16	16	16	16	16	16	16	16	16	16	16	16	16	15	15	15	15	15
19	375	1	19	19	19	19	19	19	19	19	19	19	19	19	19	19	19	19	19	19	12	13
81	376	1	81	81	81	81	81	81	81	81	81	81	81	81	81	81	81	81	81	81	81	81
1	377	1	1	1	1	1	1	1	1	1	1	1	1	1	1	1	1	1	1	1	1	1
4	378	1	4	4	4	2	2	2	2	2	2	2	2	2	2	4	4	4	4	4	4	4
11	379	1	11	11	11	11	11	11	11	11	11	11	11	12	13	13	13	13	13	13	13	13
22	380	1	22	22	22	22	22	22	22	22	22	22	22	22	22	22	22	22	22	22	22	22
24	381	1	24	24	24	24	24	24	24	24	24	24	24	24	24	24	24	24	24	24	24	24
4	382	1	4	4	4	4	5	6	7	8	9	9	9	10	10	11	12	13	13	14	15	16
1	383	1	1	1	1	1	1	1	1	1	1	1	1	1	1	1	1	1	1	1	1	1
11	384	1	11	11	11	11	11	11	11	11	11	11	1	1	1	1	1	1	1	1	1	1
25	386	1	25	25	25	25	25	25	25	25	25	25	25	25	25	25	25	25	25	25	25	25
2	387	1	2	2	2	2	2	2	2	2	2	2	2	2	1	1	1	1	1	1	1	1
7	388	1	7	7	7	7	7	7	6	7	8	9	9	10	10	10	10	10	10	10	10	10
1	389	1	1	1	1	1	1	1	1	1	1	1	1	1	1	1	1	1	1	1	1	2
2	391	1	2	1	1	1	1	1	1	1	1	1	1	1	1	1	1	1	1	1	1	1
1	392	1	1	1	1	1	1	1	1	1	1	1	1	1	1	1	1	1	1	1	1	1
14	395	1	14	14	14	14	14	14	14	14	14	14	14	14	14	1	1	1	1	1	1	1
1	396	1	1	1	1	1	1	1	1	1	1	1	1	1	1	1	1	1	1	1	1	8
17	397	1	17	17	17	17	17	17	17	17	17	17	17	17	17	17	17	17	8	8	9	10
37	400	1	37	37	37	37	37	37	37	37	37	37	37	37	37	37	37	37	37	37	37	37
36	401	1	36	36	36	36	36	36	36	36	36	36	36	36	36	36	36	36	36	36	36	36
32	402	1	32	32	32	32	32	32	32	32	32	32	32	32	32	32	32	32	32	32	32	32
35	403	1	35	35	35	35	35	35	35	35	35	35	35	35	35	35	35	35	35	35	35	35
18	404	1	18	18	18	18	18	18	18	18	18	18	18	18	18	18	18	18	18	4	5	5
14	405	1	14	14	14	14	14	14	14	14	14	14	14	14	14	13	14	14	14	11	12	16
25	406	1	25	25	25	25	25	25	25	25	25	25	25	25	25	25	25	25	25	25	25	25
24	408	1	24	24	24	24	24	24	24	24	24	24	24	24	24	24	24	24	24	24	24	24
15	409	1	15	15	15	15	15	15	15	15	15	15	15	15	15	15	11	12	12	9	9	13
18	410	1	18	18	18	18	18	18	18	18	18	18	18	18	18	18	18	18	18	18	18	18
15	411	1	15	15	15	15	15	15	15	15	15	15	15	15	15	15	15	16	15	15	17	19
43	412	1	43	43	43	43	43	43	43	43	43	43	43	43	43	43	43	43	43	43	43	43
4	413	1	4	4	4	4	4	1	1	1	1	1	1	1	1	1	1	1	1	1	1	1
4	414	1	4	4	4	1	1	1	1	1	1	1	1	1	1	1	1	1	1	1	1	1
2	415	1	2	1	1	1	1	1	1	1	1	2	2	2	2	2	2	2	2	2	2	2
6	416	1	6	6	6	6	6	6	6	3	4	4	4	4	4	4	4	4	4	3	3	3
28	417	1	28	28	28	28	28	28	28	28	28	28	28	28	28	28	28	28	28	28	28	28
5	418	1	5	5	5	5	1	1	1	1	1	1	1	1	2	2	2	2	2	2	2	3
4	420	1	4	4	4	4	5	6	7	8	9	10	11	12	13	13	13	14	15	16	16	16
2	422	1	2	1	1	1	2	2	3	3	3	3	3	3	3	3	3	3	3	3	3	3
10	423	1	10	10	10	10	10	10	10	10	10	9	10	10	10	10	10	10	10	10	10	10
11	424	1	11	11	11	11	11	11	11	11	11	11	9	9	9	9	9	9	9	9	9	9
7	425	1	7	7	7	7	7	7	1	1	1	1	1	1	1	1	1	1	1	1	1	1
4	426	1	4	4	4	4	4	4	4	4	4	4	4	4	4	4	4	4	4	4	4	4
1	427	1	1	1	1	1	1	1	1	1	1	1	1	1	1	1	1	1	1	1	1	1
22	428	1	22	22	22	22	22	22	22	22	22	22	22	22	22	22	22	22	22	22	22	22
28	429	1	28	28	28	28	28	28	28	28	28	28	28	28	28	28	28	28	28	28	28	28
7	430	1	7	7	7	7	7	7	7	7	7	7	7	7	7	7	7	7	7	7	7	7
1	432	1	1	1	2	2	2	2	2	2	2	2	2	2	2	2	2	2	2	2	2	2
23	433	1	23	23	23	23	23	23	23	23	23	23	23	23	23	23	23	23	23	23	23	23
1	436	1	1	1	1	1	1	1	1	1	1	1	1	1	1	1	1	1	1	1	1	1
1	437	1	1	1	1	1	1	1	1	1	1	1	1	1	1	1	1	1	1	1	1	1
1	439	1	1	1	1	1	1	1	1	1	1	1	1	1	1	1	1	1	1	1	1	1
23	440	1	23	23	23	23	23	23	23	23	23	23	23	23	23	23	23	23	23	23	23	23
13	441	1	13	13	13	13	13	13	13	13	13	13	13	13	12	11	12	12	13	4	2	3
4	442	1	4	4	4	4	4	6	6	6	6	6	6	6	7	3	3	3	4	4	4	4
2	443	1	2	2	3	3	3	3	3	3	3	3	3	3	3	3	3	3	3	3	3	3
21	444	1	21	21	21	21	21	21	21	21	21	21	21	21	21	21	21	21	21	21	21	21
6	445	1	6	6	6	6	6	3	2	2	2	3	3	3	3	3	3	4	5	5	5	5
185	446	1	185	185	185	185	185	185	185	185	185	185	185	185	185	185	185	185	185	185	185	185
1	447	1	1	1	1	1	1	1	1	1	1	1	1	1	1	1	1	1	1	1	1	1
29	448	1	29	29	29	29	29	29	29	29	29	29	29	29	29	29	29	29	29	29	29	29
60	449	1	60	60	60	60	60	60	60	60	60	60	60	60	60	60	60	60	60	60	60	60
42	450	1	42	42	42	42	42	42	42	42	42	42	42	42	42	42	42	42	42	42	42	42
6	451	1	6	6	6	6	6	2	2	2	2	2	2	2	2	2	2	2	2	2	2	2
18	452	1	18	18	18	18	18	18	18	18	18	18	18	18	18	18	18	18	18	9	9	9
1	453	1	1	1	1	1	1	1	1	1	1	1	1	1	1	1	1	1	1	1	1	1
1	454	1	1	1	1	1	1	1	1	1	1	1	1	1	1	1	1	1	1	1	1	1
6	455	1	6	6	6	6	6	1	1	2	2	2	2	2	2	2	2	2	2	2	2	2
7	456	1	7	7	7	7	7	7	4	5	5	5	5	5	5	5	5	5	5	5	5	5
8	457	1	8	8	8	8	8	8	8	5	6	6	6	6	6	6	6	6	6	6	6	6
4	458	1	4	4	4	1	1	1	1	1	1	1	1	1	1	1	1	1	1	1	1	1
1	459	1	1	1	1	1	1	1	1	1	1	1	1	1	1	1	1	1	1	1	1	1
1	460	1	1	1	1	1	1	1	1	1	1	1	1	1	1	1	1	1	1	1	1	1
9	461	1	9	9	9	9	9	9	9	9	7	7	8	8	8	8	8	8	6	7	6	7
2	463	1	2	2	3	3	3	3	3	3	3	3	3	3	3	3	3	3	3	3	3	3
3	464	1	3	3	3	3	3	3	3	3	3	3	3	3	3	3	3	3	3	3	3	3
4	466	1	4	4	4	1	1	1	1	1	1	1	1	2	2	2	3	3	3	3	3	4
1	468	1	1	1	1	1	1	1	1	1	1	1	1	1	1	1	1	1	1	1	1	1
39	469	1	39	39	39	39	39	39	39	39	39	39	39	39	39	39	39	39	39	39	39	39
4	470	1	4	4	4	4	4	4	3	3	3	3	3	3	3	3	3	3	3	3	3	3
2	471	1	2	2	2	2	3	4	4	5	6	6	6	6	2	2	2	2	2	2	2	2
1	472	1	1	1	1	1	3	3	3	4	4	4	4	4	1	1	1	1	1	1	1	1
17	473	1	17	17	17	17	17	17	17	17	17	17	17	17	17	17	17	17	17	17	17	17
5	474	1	5	5	5	5	1	1	1	1	1	1	1	1	1	1	1	1	1	1	1	1
41	475	1	41	41	41	41	41	41	41	41	41	41	41	41	41	41	41	41	41	41	41	41
3	476	1	3	3	3	3	3	3	3	3	3	3	3	4	4	4	4	4	4	4	4	5
2	477	1	2	1	1	1	1	1	1	1	1	1	1	1	1	1	1	1	1	1	1	1
3	478	1	3	3	3	3	3	3	3	3	3	3	3	3	3	3	3	3	3	3	3	3
1	479	1	1	1	1	1	1	1	1	1	1	1	1	1	1	1	1	1	1	1	1	1
19	480	1	19	19	19	19	19	19	19	19	19	19	19	19	19	19	19	19	19	19	19	19
11	482	1	11	11	11	11	11	11	11	11	11	11	1	1	1	1	1	1	1	1	1	1
21	483	1	21	21	21	21	21	21	21	21	21	21	21	21	21	21	21	21	21	21	21	21
305	484	1	305	305	305	305	305	305	305	305	305	305	305	305	305	305	305	305	305	305	305	305
88	485	1	88	88	88	88	88	88	88	88	88	88	88	88	88	88	88	88	88	88	88	88
3	486	1	3	3	3	3	3	3	3	3	3	1	1	1	1	1	1	1	1	1	1	1
29	487	1	29	29	29	29	29	29	29	29	29	29	29	29	29	29	29	29	29	29	29	29
6	488	1	6	6	6	6	6	2	2	2	2	2	2	2	2	2	2	2	2	2	2	2
1	489	1	1	1	1	1	1	1	1	1	1	1	1	1	1	1	1	1	1	1	1	1
10	490	1	10	10	10	10	10	10	10	10	10	10	11	12	12	13	14	15	15	16	17	17
1	491	1	1	1	1	1	1	1	1	1	1	1	1	1	1	1	1	1	1	1	1	1
16	493	1	16	16	16	16	16	16	16	16	16	16	16	16	16	16	16	4	4	4	5	5
3	495	1	3	3	3	3	4	5	5	6	5	5	5	5	5	5	4	5	4	6	6	6
1	496	1	1	1	1	1	2	2	1	1	1	1	1	1	1	1	1	1	1	1	1	1
44	497	1	44	44	44	44	44	44	44	44	44	44	44	44	44	44	44	44	44	44	44	44
2	498	1	2	2	2	2	2	1	1	1	1	1	1	1	1	1	1	1	1	1	1	1
11	499	1	11	11	11	11	11	11	11	11	11	11	10	11	11	11	12	12	12	12	12	12
1	501	1	1	1	1	1	1	1	1	1	1	1	1	1	1	1	1	1	1	2	3	3
10	503	1	10	10	10	10	10	10	10	10	10	1	1	1	1	1	1	1	1	1	1	1
2	504	1	2	2	1	1	1	1	1	1	1	1	1	1	1	1	1	1	1	1	1	1
1	505	1	1	1	1	1	1	1	1	1	1	1	1	1	1	1	1	1	1	1	1	1
13	508	1	13	13	13	13	13	13	13	13	13	13	13	13	11	12	12	12	12	12	12	12
3	509	1	3	3	3	3	3	3	3	4	5	5	6	3	3	3	3	3	3	3	3	3
3	510	1	3	3	3	3	3	3	3	4	5	6	6	3	3	3	3	3	3	3	3	3
11	511	1	11	11	11	11	11	11	11	11	11	11	7	7	7	7	8	8	9	9	10	10
15	512	1	15	15	15	15	15	15	15	15	15	15	15	15	15	15	4	4	4	4	4	3
3	513	1	3	3	3	3	3	3	3	3	3	3	3	3	3	3	3	3	3	3	3	3
3	514	1	3	3	3	3	3	3	3	3	3	3	3	3	3	3	3	3	3	3	3	3
39	515	1	39	39	39	39	39	39	39	39	39	39	39	39	39	39	39	39	39	39	39	39
14	516	1	14	14	14	14	14	14	14	14	14	14	14	14	14	8	9	12	13	10	11	11
1	517	1	1	1	1	1	1	1	1	1	1	1	1	1	1	1	1	1	1	1	1	1
1	518	1	1	1	2	2	3	4	6	7	9	3	3	3	3	3	3	3	3	3	3	3
5	519	1	5	5	5	5	2	2	2	2	2	2	2	2	2	2	2	2	2	2	2	2
43	521	1	43	43	43	43	43	43	43	43	43	43	43	43	43	43	43	43	43	43	43	43
25	522	1	25	25	25	25	25	25	25	25	25	25	25	25	25	25	25	25	25	25	25	25
3	523	1	3	3	3	3	3	3	3	3	3	3	3	3	3	3	3	3	3	3	3	3
11	524	1	11	11	11	11	11	11	11	11	11	11	2	2	2	2	2	2	2	3	3	3
2	525	1	2	1	1	1	1	1	1	1	1	1	1	1	1	1	1	1	1	1	1	1
24	526	1	24	24	24	24	24	24	24	24	24	24	24	24	24	24	24	24	24	24	24	24
11	527	1	11	11	11	11	11	11	11	11	11	11	11	12	12	13	13	14	14	15	16	16
21	528	1	21	21	21	21	21	21	21	21	21	21	21	21	21	21	21	21	21	21	21	21
22	529	1	22	22	22	22	22	22	22	22	22	22	22	22	22	22	22	22	22	22	22	22
57	530	1	57	57	57	57	57	57	57	57	57	57	57	57	57	57	57	57	57	57	57	57
10	531	1	10	10	10	10	10	10	10	10	10	5	5	5	5	5	5	5	5	5	5	5
1	532	1	1	1	1	1	1	1	1	1	1	1	1	1	1	1	1	1	1	1	1	1
2	533	1	2	2	2	2	2	2	2	2	2	2	2	2	2	2	2	2	2	2	2	2
1	534	1	1	1	1	1	1	1	1	1	1	1	1	1	1	1	1	1	1	1	1	1
25	535	1	25	25	25	25	25	25	25	25	25	25	25	25	25	25	25	25	25	25	25	25
5	536	1	5	5	5	5	5	6	7	8	9	9	11	11	11	11	11	11	11	11	11	11
1	537	1	1	1	1	2	1	1	1	1	1	1	1	1	5	5	5	5	5	5	5	6
4	538	1	4	4	4	1	1	1	1	1	1	1	1	1	1	1	1	1	1	1	1	1
1	539	1	1	1	1	1	1	1	1	1	2	2	2	2	2	2	2	2	2	2	2	2
3	540	1	3	3	2	1	1	1	1	1	1	1	1	1	1	1	1	1	1	1	1	1
50	541	1	50	50	50	50	50	50	50	50	50	50	50	50	50	50	50	50	50	50	50	50
4	542	1	4	4	4	3	3	3	3	3	3	3	3	3	3	3	3	3	3	3	3	3
11	543	1	11	11	11	11	11	11	11	11	11	11	7	7	7	7	7	7	7	7	7	7
2	544	1	2	2	2	2	2	2	2	2	2	2	2	2	2	2	2	2	2	2	2	2
7	545	1	7	7	7	7	7	7	2	2	2	2	2	2	2	2	2	2	2	2	2	2
1	546	1	1	1	1	1	1	1	1	1	1	1	1	1	1	1	1	1	1	1	1	1
4	548	1	4	4	4	4	4	5	6	6	1	1	1	1	1	1	1	1	1	1	1	1
14	549	1	14	14	14	14	14	14	14	14	14	14	14	14	14	4	4	4	4	4	4	4
6	550	1	6	6	6	6	6	1	1	1	1	1	1	1	1	1	1	1	1	1	1	1
5	551	1	5	5	5	5	5	6	7	8	8	8	1	1	1	1	1	1	1	1	1	1
1	552	1	1	1	1	1	1	1	1	1	1	1	1	1	1	1	1	1	1	1	1	1
1	553	1	1	1	1	2	2	2	2	3	3	3	1	1	1	1	1	1	1	1	1	1
2	554	1	2	1	1	1	2	3	4	4	4	4	4	4	4	4	4	4	4	1	1	1
2	555	1	2	1	1	1	1	1	1	1	1	2	2	2	2	2	3	3	3	3	3	3
4	556	1	4	4	4	3	3	3	3	4	3	1	1	1	2	3	3	3	3	3	3	3
4	557	1	4	4	4	2	2	4	1	1	1	1	1	1	1	1	1	1	1	1	1	1
8	559	1	8	8	8	8	8	8	8	3	4	5	5	5	5	4	4	4	4	4	4	4
1	560	1	1	1	1	1	1	1	1	1	1	1	1	1	2	3	3	3	3	3	3	3
9	561	1	9	9	9	9	9	9	9	9	1	1	1	1	1	1	1	1	1	1	1	1
11	562	1	11	11	11	11	11	11	11	11	11	11	3	3	3	3	3	3	3	3	3	3
17	563	1	17	17	17	17	17	17	17	17	17	17	17	17	17	17	17	17	17	17	17	17
13	564	1	13	13	13	13	13	13	13	13	13	13	13	13	1	1	1	1	1	1	1	1
6	565	1	6	6	6	6	6	3	3	3	3	3	3	3	3	3	3	3	3	3	3	3
47	566	1	47	47	47	47	47	47	47	47	47	47	47	47	47	47	47	47	47	47	47	47
13	567	1	13	13	13	13	13	13	13	13	13	13	13	13	8	8	8	8	8	8	8	8
24	568	1	24	24	24	24	24	24	24	24	24	24	24	24	24	24	24	24	24	24	24	24
2	569	1	2	2	3	4	5	5	6	6	6	6	7	7	8	8	8	8	8	13	13	13
27	570	1	27	27	27	27	27	27	27	27	27	27	27	27	27	27	27	27	27	27	27	27
7	571	1	7	7	7	7	7	7	2	2	3	3	3	3	3	3	3	3	3	3	3	3
32	572	1	32	32	32	32	32	32	32	32	32	32	32	32	32	32	32	32	32	32	32	32
74	573	1	74	74	74	74	74	74	74	74	74	74	74	74	74	74	74	74	74	74	74	74
7	574	1	7	7	7	7	7	7	2	2	2	2	2	2	2	2	2	2	2	2	2	2
4	575	1	4	4	4	4	4	4	4	4	4	4	4	4	4	4	4	4	4	4	4	4
1	576	1	1	1	1	1	1	1	1	1	1	1	1	1	1	1	1	1	1	1	1	1
5	577	1	5	5	5	5	5	6	6	6	6	6	6	6	6	6	6	6	6	6	6	6
3	578	1	3	3	1	1	1	1	1	1	1	1	1	1	1	1	1	1	1	1	1	1
1	579	1	1	2	3	3	4	5	5	5	6	6	7	8	9	1	1	1	1	1	1	1
1	580	1	1	1	1	1	1	1	1	2	2	3	3	4	4	4	4	4	4	4	4	4
1	581	1	1	1	1	1	1	1	1	1	1	1	1	1	1	1	1	1	1	1	1	1
6	582	1	6	6	6	6	6	1	1	1	1	1	1	1	1	1	1	1	1	1	1	1
1	583	1	1	1	1	1	1	1	1	1	1	1	1	1	1	1	1	1	1	1	1	1
1	584	1	1	1	1	1	1	1	1	1	1	1	1	1	1	1	1	1	1	1	1	1
17	585	1	17	17	17	17	17	17	17	17	17	17	17	17	17	17	17	17	3	3	3	3
1	586	1	1	1	1	1	1	1	1	1	1	1	1	1	1	2	2	2	2	2	2	3
15	587	1	15	15	15	15	15	15	15	15	15	15	15	15	15	15	12	12	13	2	3	4
1	588	1	1	1	1	1	1	1	1	1	1	1	1	1	1	1	1	1	1	1	1	1
1	589	1	1	1	1	1	1	1	1	1	1	1	1	1	1	1	1	1	1	1	1	1
2	591	1	2	1	1	1	1	1	1	1	1	1	1	1	1	1	1	1	1	1	1	1
5	592	1	5	5	5	5	4	4	4	4	4	4	4	4	4	4	4	4	4	4	4	4
1	593	1	1	2	2	3	3	3	3	3	3	3	3	3	3	3	3	3	3	3	3	3
2	594	1	2	2	2	1	1	1	1	1	1	1	1	1	1	1	1	1	1	1	1	1
1	595	1	1	2	3	3	3	3	3	3	3	3	3	3	3	4	5	3	4	4	4	5
1	596	1	1	1	1	1	1	1	1	1	1	1	1	1	1	1	1	1	1	1	1	1
1	598	1	1	1	1	2	2	2	2	2	3	3	3	3	3	3	4	4	4	4	4	4
9	600	1	9	9	9	9	9	9	9	9	1	1	1	1	2	3	3	3	3	3	4	4
21	601	1	21	21	21	21	21	21	21	21	21	21	21	21	21	21	21	21	21	21	21	21
25	602	1	25	25	25	25	25	25	25	25	25	25	25	25	25	25	25	25	25	25	25	25
7	604	1	7	7	7	7	7	7	1	1	1	1	1	1	1	1	1	1	1	1	1	1
2	605	1	2	1	1	1	1	1	1	1	1	1	1	1	1	1	1	1	1	1	1	1
2	606	1	2	1	1	1	1	1	1	1	1	1	1	1	1	1	1	1	1	1	1	1
3	607	1	3	3	3	3	1	2	1	1	1	1	1	1	1	1	1	1	1	1	1	1
1	608	1	1	1	1	1	1	1	1	1	1	1	1	1	1	1	1	1	1	1	1	1
1	609	1	1	1	1	2	3	3	3	2	2	2	2	2	2	2	2	2	2	2	2	2
1	610	1	1	1	1	1	1	1	1	1	1	1	1	1	1	1	1	1	1	1	1	1
4	613	2	4	4	4	4	4	4	4	4	4	4	4	4	4	4	4	4	4	4	4	4
1	615	2	1	1	1	1	1	1	1	1	1	1	1	1	1	1	1	1	1	1	1	1
1	617	2	1	1	1	1	1	1	1	1	1	1	1	1	1	1	1	1	1	1	1	1
5	618	2	5	5	5	5	1	1	1	1	1	1	1	1	1	1	1	1	1	1	1	1
2	619	2	2	2	2	2	2	2	2	2	2	2	2	2	2	2	2	2	2	2	2	2
12	620	2	12	12	12	12	12	12	12	12	12	12	12	11	12	12	13	13	13	13	13	13
1	621	2	1	1	1	1	1	1	1	1	1	1	1	1	1	1	1	1	1	1	1	1
1	622	2	1	1	1	1	1	1	1	1	1	1	1	1	1	1	1	1	1	1	1	1
38	623	2	38	38	38	38	38	38	38	38	38	38	38	38	38	38	38	38	38	38	38	38
2	624	2	2	1	1	1	1	1	1	1	1	1	1	1	1	1	1	1	1	1	1	1
25	625	2	25	25	25	25	25	25	25	25	25	25	25	25	25	25	25	25	25	25	25	25
56	626	2	56	56	56	56	56	56	56	56	56	56	56	56	56	56	56	56	56	56	56	56
4	627	2	4	4	4	4	1	1	1	1	1	1	1	1	1	1	1	1	1	1	1	1
12	628	2	12	12	12	12	12	12	12	12	12	12	12	11	12	13	14	15	16	17	18	19
26	629	2	26	26	26	26	26	26	26	26	26	26	26	26	26	26	26	26	26	26	26	26
37	630	2	37	37	37	37	37	37	37	37	37	37	37	37	37	37	37	37	37	37	37	37
24	631	2	24	24	24	24	24	24	24	24	24	24	24	24	24	24	24	24	24	24	24	24
7	632	2	7	7	7	7	7	7	1	1	1	1	1	1	1	1	1	1	1	1	1	1
1	633	2	1	1	1	1	1	1	1	1	1	1	1	1	1	1	1	1	1	1	1	1
1	634	2	1	1	1	1	1	1	1	1	1	1	1	1	1	1	1	1	1	1	1	1
7	635	2	7	7	7	7	7	7	4	4	1	1	1	1	1	1	1	1	1	1	1	1
9	636	2	9	9	9	9	9	9	9	9	1	1	1	1	1	1	1	1	1	1	1	1
1	637	2	1	1	1	1	1	1	1	1	1	1	1	1	1	1	1	1	1	1	1	1
3	638	2	3	3	2	2	2	2	2	2	3	3	3	3	3	3	3	3	3	3	3	3
23	639	2	23	23	23	23	23	23	23	23	23	23	23	23	23	23	23	23	23	23	23	23
38	640	2	38	38	38	38	38	38	38	38	38	38	38	38	38	38	38	38	38	38	38	38
1	641	2	1	1	1	1	1	1	1	1	1	1	1	1	1	1	1	1	1	1	1	1
25	642	2	25	25	25	25	25	25	25	25	25	25	25	25	25	25	25	25	25	25	25	25
6	643	2	6	6	6	6	6	1	1	1	1	1	1	1	1	1	1	1	1	1	1	1
28	644	2	28	28	28	28	28	28	28	28	28	28	28	28	28	28	28	28	28	28	28	28
10	645	2	10	10	10	10	10	10	10	10	10	1	1	1	1	1	1	1	1	1	1	1
116	646	2	116	116	116	116	116	116	116	116	116	116	116	116	116	116	116	116	116	116	116	116
71	647	2	71	71	71	71	71	71	71	71	71	71	71	71	71	71	71	71	71	71	71	71
5	648	2	5	5	5	5	1	1	1	1	1	1	1	1	1	1	1	1	1	1	1	1
1	649	2	1	1	1	1	1	1	1	1	1	1	1	1	1	1	1	1	1	1	1	1
3	650	2	3	3	1	1	1	1	1	2	2	2	2	2	2	2	2	2	2	2	2	2
1	651	2	1	1	1	1	1	1	1	1	1	1	1	1	1	1	1	1	1	1	1	1
23	652	2	23	23	23	23	23	23	23	23	23	23	23	23	23	23	23	23	23	23	23	23
10	653	2	10	10	10	10	10	10	10	10	10	9	9	9	9	9	9	9	9	9	9	9
9	654	2	9	9	9	9	9	9	9	9	9	9	9	9	9	9	9	9	9	9	9	9
1	656	2	1	1	1	1	1	1	1	1	1	1	1	1	1	1	1	1	1	1	1	1
3	658	2	3	3	1	1	1	1	1	1	1	1	1	1	1	1	1	1	1	1	1	1
16	660	2	16	16	16	16	16	16	16	16	16	16	16	16	16	16	16	8	8	7	7	8
23	661	2	23	23	23	23	23	23	23	23	23	23	23	23	23	23	23	23	23	23	23	23
3	662	2	3	3	1	1	1	1	1	1	1	1	1	1	1	1	1	1	1	1	1	1
48	663	2	48	48	48	48	48	48	48	48	48	48	48	48	48	48	48	48	48	48	48	48
39	664	2	39	39	39	39	39	39	39	39	39	39	39	39	39	39	39	39	39	39	39	39
41	665	2	41	41	41	41	41	41	41	41	41	41	41	41	41	41	41	41	41	41	41	41
1	666	2	1	1	1	1	1	1	1	1	1	1	1	1	1	1	1	1	1	1	1	1
50	667	2	50	50	50	50	50	50	50	50	50	50	50	50	50	50	50	50	50	50	50	50
9	668	2	9	9	9	9	9	9	9	9	8	8	8	8	8	8	8	8	8	8	8	8
1	669	2	1	1	1	1	1	1	1	1	1	1	1	1	1	1	1	1	1	1	1	1
1	670	2	1	1	1	1	1	1	1	1	2	2	2	2	2	2	2	2	2	2	2	2
13	671	2	13	13	13	13	13	13	13	13	13	13	13	13	4	4	4	4	4	4	4	4
13	672	2	13	13	13	13	13	13	13	13	13	13	13	13	5	5	5	5	5	5	5	5
3	673	2	3	3	1	1	1	1	1	1	1	1	1	1	1	1	1	1	1	1	1	1
1	674	2	1	1	1	1	1	1	1	1	1	1	1	1	1	1	1	1	1	1	1	1
6	675	2	6	6	6	6	6	3	3	3	3	3	3	3	3	3	3	3	3	3	3	3
1	676	2	1	1	1	1	1	1	1	1	1	1	1	1	1	1	1	1	1	1	1	1
3	677	2	3	3	2	3	3	3	3	3	3	3	3	3	3	3	3	3	3	3	3	3
7	679	2	7	7	7	7	7	7	5	5	5	5	5	5	5	5	5	5	5	5	5	5
1	680	2	1	1	1	1	1	1	1	1	1	1	1	1	1	1	1	1	1	1	1	1
26	681	2	26	26	26	26	26	26	26	26	26	26	26	26	26	26	26	26	26	26	26	26
3	682	2	3	3	3	3	3	3	3	3	3	3	3	3	3	3	3	3	3	3	3	3
6	683	2	6	6	6	6	6	2	2	2	2	2	2	2	2	2	2	2	2	2	2	2
6	684	2	6	6	6	6	6	4	4	4	4	4	4	4	4	4	4	4	4	4	4	4
36	685	2	36	36	36	36	36	36	36	36	36	36	36	36	36	36	36	36	36	36	36	36
28	686	2	28	28	28	28	28	28	28	28	28	28	28	28	28	28	28	28	28	28	28	28
1	687	2	1	1	1	1	1	1	1	1	1	1	1	1	1	1	1	1	1	1	1	1
1	688	2	1	1	1	1	1	1	1	1	1	1	1	1	1	1	1	1	1	1	1	1
8	689	2	8	8	8	8	8	8	8	3	5	5	5	1	1	1	1	1	1	1	1	1
8	690	2	8	8	8	8	8	8	8	1	1	1	1	1	1	1	1	1	1	1	1	1
75	691	2	75	75	75	75	75	75	75	75	75	75	75	75	75	75	75	75	75	75	75	75
51	692	2	51	51	51	51	51	51	51	51	51	51	51	51	51	51	51	51	51	51	51	51
4	693	2	4	4	4	3	3	3	3	3	3	3	3	3	3	3	3	3	3	3	3	3
7	694	2	7	7	7	7	7	7	4	4	3	3	3	7	7	7	7	7	9	8	9	9
2	695	2	2	2	2	2	2	2	2	2	2	2	2	2	2	2	2	2	2	2	2	2
6	696	2	6	6	6	6	6	1	1	1	1	1	1	1	1	1	1	1	1	1	1	1
5	697	2	5	5	5	5	3	4	3	3	3	3	3	3	3	3	3	3	3	3	3	3
4	698	2	4	4	4	2	2	3	3	4	4	4	4	4	4	4	4	4	4	4	4	4
1	699	2	1	1	1	1	1	1	2	3	5	5	5	6	7	7	7	7	8	8	8	8
7	700	2	7	7	7	7	7	7	1	1	1	1	1	1	1	1	1	1	1	1	1	1
6	701	2	6	6	6	6	6	1	1	1	3	3	3	3	3	3	4	5	6	6	6	5
1	702	2	1	1	1	1	1	1	1	1	1	1	1	1	1	1	1	1	1	1	1	1
1	703	2	1	1	1	1	1	1	1	1	1	1	1	1	1	1	1	1	1	1	1	1
7	704	2	7	7	7	7	7	7	2	2	2	2	2	2	2	2	2	2	3	4	4	4
5	705	2	5	5	5	5	5	5	5	5	5	5	5	5	5	5	5	5	5	5	5	5
2	706	2	2	1	2	1	1	1	1	1	1	1	1	1	1	1	1	1	1	1	1	1
2	707	2	2	1	1	1	1	1	1	1	1	1	1	1	1	1	1	1	1	1	1	1
32	708	2	32	32	32	32	32	32	32	32	32	32	32	32	32	32	32	32	32	32	32	32
31	709	2	31	31	31	31	31	31	31	31	31	31	31	31	31	31	31	31	31	31	31	31
4	710	2	4	4	4	1	1	1	1	1	1	1	1	1	1	1	1	1	1	1	1	1
12	711	2	12	12	12	12	12	12	12	12	12	12	12	4	4	5	5	5	5	5	5	4
1	712	2	1	1	1	1	1	1	1	1	1	1	1	1	1	1	1	1	1	1	1	1
2	713	2	2	2	1	1	1	1	1	1	1	1	1	1	1	1	1	1	1	1	1	1
10	714	2	10	10	10	10	10	10	10	10	10	1	1	2	2	2	2	2	2	2	2	2
7	715	2	7	7	7	7	7	7	4	6	5	5	6	6	5	5	5	5	5	5	5	5
1	716	2	1	1	1	1	1	1	1	1	1	1	1	1	1	1	1	1	1	1	1	1
1	717	2	1	1	1	1	1	1	1	1	1	1	1	1	1	1	1	1	1	1	1	1
17	718	2	17	17	17	17	17	17	17	17	17	17	17	17	17	17	17	17	3	3	3	3
4	719	2	4	4	4	2	2	2	3	4	4	4	4	5	6	5	5	5	4	6	8	8
2	720	2	2	2	1	1	1	1	1	1	1	1	1	1	1	1	1	1	1	1	1	1
8	721	2	8	8	8	8	8	8	8	2	2	2	2	3	3	3	3	3	3	3	3	3
1	722	2	1	1	1	1	1	1	1	1	1	1	1	1	1	1	1	1	1	1	1	1
2	723	2	2	2	3	4	2	2	2	2	2	2	2	2	2	2	2	2	2	2	2	2
3	724	2	3	3	3	3	3	3	3	3	3	3	3	3	3	3	3	3	3	3	3	3
72	725	2	72	72	72	72	72	72	72	72	72	72	72	72	72	72	72	72	72	72	72	72
73	726	2	73	73	73	73	73	73	73	73	73	73	73	73	73	73	73	73	73	73	73	73
3	727	2	3	3	1	1	1	1	1	1	1	1	1	1	1	1	1	1	1	1	1	1
11	728	2	11	11	11	11	11	11	11	11	11	11	1	1	1	1	2	2	2	2	2	2
22	729	2	22	22	22	22	22	22	22	22	22	22	22	22	22	22	22	22	22	22	22	22
3	730	2	3	3	3	3	3	3	3	3	3	3	3	3	3	3	3	3	3	3	3	3
4	731	2	4	4	4	2	2	2	2	2	2	2	2	2	2	2	2	2	2	2	2	2
1	732	2	1	2	2	2	2	2	2	2	2	2	2	2	2	2	2	2	2	2	2	2
1	733	2	1	2	2	2	2	2	2	2	2	2	2	2	2	2	2	2	2	2	2	2
11	734	2	11	11	11	11	11	11	11	11	11	11	3	3	3	3	3	3	3	3	3	3
8	735	2	8	8	8	8	8	8	8	4	4	4	4	4	4	4	4	4	4	4	4	4
2	736	2	2	2	2	2	2	2	2	2	2	2	2	2	2	2	2	2	2	2	2	2
1	737	2	1	1	1	1	1	1	1	1	1	1	1	1	1	1	1	1	1	1	1	1
164	738	2	164	164	164	164	164	164	164	164	164	164	164	164	164	164	164	164	164	164	164	164
1	739	2	1	2	1	3	3	4	2	2	2	2	2	2	2	2	2	2	2	2	2	2
2	740	2	2	2	3	4	4	4	4	4	4	4	4	4	4	4	4	4	4	4	4	4
47	741	2	47	47	47	47	47	47	47	47	47	47	47	47	47	47	47	47	47	47	47	47
3	742	2	3	3	1	1	1	1	1	1	1	1	1	1	1	1	1	1	1	1	1	1
4	743	2	4	4	4	1	1	1	1	1	1	1	1	1	1	1	1	1	1	1	1	1
1	744	2	1	1	1	1	1	1	1	1	1	1	1	1	1	1	1	1	1	1	1	1
2	745	2	2	1	1	1	1	1	1	1	1	1	1	1	1	3	3	3	3	3	3	3
1	746	2	1	2	2	2	2	2	2	2	2	2	2	2	2	2	2	2	2	2	2	2
2	747	2	2	2	2	2	2	2	2	2	2	2	2	2	2	2	2	2	2	2	2	2
1	748	2	1	1	1	1	1	1	1	1	1	1	1	1	1	1	1	1	1	1	1	1
18	749	2	18	18	18	18	18	18	18	18	18	18	18	18	18	18	18	18	18	1	1	1
9	750	2	9	9	9	9	9	9	9	9	1	2	2	2	2	2	2	2	2	2	2	2
3	751	2	3	3	2	2	2	2	2	2	2	2	2	2	2	2	2	2	2	2	2	2
2	752	2	2	1	1	1	1	1	1	1	1	1	1	1	1	1	1	1	1	1	1	1
5	753	2	5	5	5	5	2	2	2	2	2	2	2	2	2	2	2	2	2	2	2	2
3	754	2	3	3	1	1	1	1	1	1	1	1	1	1	1	1	1	1	1	1	1	1
4	755	2	4	4	4	3	3	3	3	3	3	3	3	3	3	3	3	3	3	3	3	3
9	756	2	9	9	9	9	9	9	9	9	2	2	2	2	2	2	2	2	2	2	2	2
2	757	2	2	2	2	2	2	2	2	2	2	2	2	2	2	2	2	2	2	2	2	2
1	758	2	1	1	1	1	1	1	1	1	1	1	1	1	1	1	1	1	1	1	1	1
1	759	2	1	2	2	2	2	2	2	2	2	2	2	2	2	2	2	2	2	2	2	2
9	760	2	9	9	9	9	9	9	9	9	2	2	2	2	2	2	2	2	2	2	2	2
24	761	2	24	24	24	24	24	24	24	24	24	24	24	24	24	24	24	24	24	24	24	24
7	762	2	7	7	7	7	7	7	2	2	2	2	2	2	2	2	2	2	2	2	2	2
11	763	2	11	11	11	11	11	11	11	11	11	11	1	1	1	1	1	1	1	1	1	1
2	764	2	2	2	2	2	2	2	2	2	2	2	2	2	2	2	2	2	2	2	2	2
3	765	2	3	3	2	2	2	2	2	2	2	2	2	2	2	2	2	2	2	2	2	2
1	766	2	1	2	2	2	2	2	2	2	2	2	2	2	2	2	2	2	2	2	2	2
1	767	2	1	1	1	1	1	1	1	1	1	1	1	1	1	1	1	1	1	1	1	1
12	768	2	12	12	12	12	12	12	12	12	12	12	12	1	1	1	1	1	1	1	1	1
4	769	2	4	4	4	4	4	4	4	4	4	4	4	4	4	4	4	4	4	4	4	4
2	770	2	2	2	2	2	2	2	2	2	2	2	2	2	2	2	2	2	2	2	2	2
1	771	2	1	2	3	4	5	6	6	6	6	6	6	6	6	6	6	6	6	6	6	6
3	772	2	3	3	2	2	2	2	2	2	2	2	2	2	2	2	2	2	2	2	2	2
1	773	2	1	1	1	1	1	1	1	1	1	1	1	1	1	1	1	1	1	1	1	1
15	774	2	15	15	15	15	15	15	15	15	15	15	15	15	15	15	2	2	2	2	2	2
5	775	2	5	5	5	5	2	2	2	2	2	2	2	2	2	2	2	2	2	2	2	2
34	776	2	34	34	34	34	34	34	34	34	34	34	34	34	34	34	34	34	34	34	34	34
36	777	2	36	36	36	36	36	36	36	36	36	36	36	36	36	36	36	36	36	36	36	36
31	778	2	31	31	31	31	31	31	31	31	31	31	31	31	31	31	31	31	31	31	31	31
1	779	2	1	2	2	2	2	2	2	2	2	2	2	2	2	2	2	2	2	2	2	2
91	780	2	91	91	91	91	91	91	91	91	91	91	91	91	91	91	91	91	91	91	91	91
9	781	2	9	9	9	9	9	9	9	9	4	4	4	4	4	4	6	4	4	4	4	4
5	782	2	5	5	5	5	3	3	3	3	3	3	3	3	3	3	5	3	3	3	3	3
3	783	2	3	3	1	1	1	1	1	1	1	1	1	1	1	1	1	1	1	1	1	1
6	784	2	6	6	6	6	6	2	2	2	2	2	2	2	3	3	5	2	2	2	2	2
4	785	2	4	4	4	4	4	4	4	4	4	4	4	4	4	4	4	4	4	4	4	4
3	786	2	3	3	1	1	1	1	1	1	1	1	1	1	1	1	1	1	1	1	1	1
5	787	2	5	5	5	5	1	1	1	1	1	1	1	1	1	1	1	1	1	1	1	1
5	788	2	5	5	5	5	1	1	1	1	2	2	2	2	2	2	2	2	2	2	2	2
1	789	2	1	1	1	1	1	1	1	1	1	1	1	1	1	1	1	1	1	1	1	1
2	790	2	2	2	2	2	2	2	2	2	2	2	2	2	2	2	2	2	2	2	2	2
4	791	2	4	4	4	1	1	1	1	1	1	1	1	1	1	1	1	1	1	1	1	1
1	792	2	1	2	2	2	2	2	2	2	2	2	2	2	2	2	2	2	2	2	2	2
5	793	2	5	5	5	5	3	3	4	5	5	5	5	5	5	5	5	5	5	5	5	4
1	794	2	1	2	2	2	2	2	2	2	2	2	2	2	2	2	2	2	2	2	2	2
9	795	2	9	9	9	9	9	9	9	9	3	3	3	3	3	3	3	3	3	3	3	3
4	796	2	4	4	4	3	3	3	3	3	3	3	3	3	2	2	2	2	2	2	2	2
1	797	2	1	1	2	2	2	1	1	1	1	1	1	1	1	1	1	1	1	1	1	1
4	798	2	4	4	4	2	2	2	2	2	2	2	2	2	2	2	2	2	2	2	2	2
1	799	2	1	2	2	2	2	2	2	2	2	2	2	2	2	2	2	2	2	2	2	2
2	800	2	2	2	2	2	2	2	2	2	2	2	2	2	2	2	2	2	2	2	2	2
1	801	2	1	1	1	1	1	1	1	1	1	3	1	1	1	1	1	1	1	1	1	1
2	802	2	2	2	2	4	4	4	4	4	2	4	4	4	4	4	4	4	4	4	4	4
31	803	2	31	31	31	31	31	31	31	31	31	31	31	31	31	31	31	31	31	31	31	31
61	804	2	61	61	61	61	61	61	61	61	61	61	61	61	61	61	61	61	61	61	61	61
1	805	2	1	2	2	2	2	2	2	2	2	2	2	2	2	2	1	1	1	1	1	1
4	806	2	4	4	4	4	4	4	4	4	5	5	5	5	5	6	6	6	6	6	6	6
1	807	2	1	2	2	3	3	3	3	3	3	3	3	3	3	3	3	3	3	3	3	3
47	808	2	47	47	47	47	47	47	47	47	47	47	47	47	47	47	47	47	47	47	47	47
3	809	2	3	3	1	1	2	2	2	2	2	2	2	2	2	2	2	2	2	2	2	2
7	810	2	7	7	7	7	7	7	2	2	2	2	2	2	2	2	2	2	2	2	2	2
2	811	2	2	1	1	2	3	3	3	3	3	3	3	3	3	3	3	3	3	3	3	1
1	812	2	1	2	2	2	2	2	2	2	2	2	2	2	2	2	2	2	2	2	2	2
1	813	2	1	1	1	1	1	1	1	1	1	1	1	1	1	1	1	1	1	1	1	1
1	814	2	1	1	1	1	1	1	1	1	1	1	1	1	1	1	1	1	1	1	1	1
1	815	2	1	1	1	1	1	1	1	1	1	1	1	1	1	1	1	1	1	1	1	1
6	816	2	6	6	6	6	6	1	1	1	1	1	1	1	1	1	1	1	1	1	1	1
1	817	2	1	1	2	3	3	3	3	3	1	1	1	1	1	1	1	1	1	1	1	1
46	818	2	46	46	46	46	46	46	46	46	46	46	46	46	46	46	46	46	46	46	46	46
3	819	2	3	3	3	4	4	4	4	4	4	4	4	4	4	4	4	4	4	4	4	4
34	820	2	34	34	34	34	34	34	34	34	34	34	34	34	34	34	34	34	34	34	34	34
2	821	2	2	2	2	2	2	2	2	2	1	1	1	1	1	2	2	2	2	2	2	2
8	822	2	8	8	8	8	8	8	8	2	2	2	2	2	2	2	2	3	2	2	3	3
1	823	2	1	1	1	1	1	1	1	1	1	1	1	1	1	1	1	1	1	1	1	1
2	824	2	2	1	1	2	2	1	1	1	1	1	1	1	1	1	1	1	1	1	1	1
4	825	2	4	4	4	2	2	2	2	2	2	2	2	2	2	2	2	2	2	2	2	2
7	826	2	7	7	7	7	7	7	1	1	1	1	1	1	1	1	1	1	1	1	1	1
25	827	2	25	25	25	25	25	25	25	25	25	25	25	25	25	25	25	25	25	25	25	25
6	828	2	6	6	6	6	6	1	1	1	1	1	1	1	1	1	1	3	4	4	4	6
2	829	2	2	1	1	1	1	1	2	2	2	2	2	2	2	2	3	3	3	3	3	3
65	830	2	65	65	65	65	65	65	65	65	65	65	65	65	65	65	65	65	65	65	65	65
3	831	2	3	3	3	4	4	4	4	4	2	2	2	2	2	2	2	2	2	2	2	2
62	832	2	62	62	62	62	62	62	62	62	62	62	62	62	62	62	62	62	62	62	62	62
1	833	2	1	1	2	2	2	2	2	2	1	1	1	1	1	1	1	1	1	1	1	1
2	834	2	2	2	2	2	2	2	2	1	1	1	2	2	2	2	2	2	2	2	2	2
1	835	2	1	1	1	1	1	1	1	1	1	1	1	1	1	1	3	3	5	6	7	7
2	836	2	2	1	1	1	1	1	1	1	2	2	2	2	2	2	2	2	2	2	2	2
1	837	2	1	2	1	1	1	1	1	1	1	1	1	1	1	1	1	1	1	1	1	1
28	838	2	28	28	28	28	28	28	28	28	28	28	28	28	28	28	28	28	28	28	28	28
21	839	2	21	21	21	21	21	21	21	21	21	21	21	21	21	21	21	21	21	21	21	21
3	840	2	3	3	1	2	2	2	2	2	2	2	2	2	2	2	2	2	2	2	2	2
11	841	2	11	11	11	11	11	11	11	11	11	11	1	1	1	1	1	1	1	1	1	1
2	842	2	2	1	1	1	1	1	1	1	2	2	2	2	2	2	2	2	2	2	2	2
3	843	2	3	3	1	2	2	2	2	2	2	1	1	1	1	1	1	1	1	1	1	1
13	844	2	13	13	13	13	13	13	13	13	13	13	13	13	1	1	1	1	1	1	1	1
1	845	2	1	1	1	1	1	1	1	1	1	1	1	1	1	1	1	1	1	1	1	1
49	846	2	49	49	49	49	49	49	49	49	49	49	49	49	49	49	49	49	49	49	49	49
45	847	2	45	45	45	45	45	45	45	45	45	45	45	45	45	45	45	45	45	45	45	45
46	848	2	46	46	46	46	46	46	46	46	46	46	46	46	46	46	46	46	46	46	46	46
12	849	2	12	12	12	12	12	12	12	12	12	12	12	2	2	2	2	2	2	2	2	2
13	850	2	13	13	13	13	13	13	13	13	13	13	13	13	1	1	1	1	1	1	1	1
10	851	2	10	10	10	10	10	10	10	10	10	1	1	1	1	1	1	1	1	1	1	1
23	852	2	23	23	23	23	23	23	23	23	23	23	23	23	23	23	23	23	23	23	23	23
1	853	2	1	2	2	2	2	2	2	2	2	2	2	2	2	2	2	2	2	2	2	2
1	854	2	1	2	1	2	2	2	2	2	2	2	2	2	2	2	2	2	2	2	2	2
20	855	2	20	20	20	20	20	20	20	20	20	20	20	20	20	20	20	20	20	20	20	1
18	856	2	18	18	18	18	18	18	18	18	18	18	18	18	18	18	18	18	18	2	2	2
79	857	2	79	79	79	79	79	79	79	79	79	79	79	79	79	79	79	79	79	79	79	79
5	858	2	5	5	5	5	2	2	2	2	2	2	2	2	2	2	2	2	2	2	2	2
1	859	2	1	2	2	2	2	2	2	2	2	2	2	2	2	2	2	2	2	2	2	2
4	860	2	4	4	4	4	5	6	6	6	6	6	6	6	6	6	6	6	6	6	6	6
3	861	2	3	3	1	3	4	5	5	5	5	5	5	5	5	5	5	5	5	5	5	5
17	862	2	17	17	17	17	17	17	17	17	17	17	17	17	17	17	17	17	2	2	2	2
2	863	2	2	1	1	1	1	1	1	1	1	1	1	1	1	1	1	1	1	1	1	1
2	864	2	2	2	3	4	5	6	6	6	6	6	6	6	6	6	2	2	2	2	2	2
4	865	2	4	4	4	4	4	4	4	4	4	4	4	4	4	4	4	4	4	4	4	4
15	866	2	15	15	15	15	15	15	15	15	15	15	15	15	15	15	1	2	2	2	2	2
4	867	2	4	4	4	1	1	1	1	1	1	1	1	1	1	1	1	1	1	1	1	1
7	868	2	7	7	7	7	7	7	3	3	3	3	3	3	3	3	3	3	3	3	3	3
6	869	2	6	6	6	6	6	6	6	6	6	6	6	6	6	6	6	6	6	6	6	6
3	870	2	3	3	3	3	3	3	3	3	3	3	3	3	3	3	3	3	3	3	3	3
2	871	2	2	2	2	2	2	2	2	2	2	2	2	2	2	2	2	2	2	2	2	2
1	873	2	1	1	1	1	1	1	1	1	1	1	1	1	1	1	1	1	1	1	1	1
1	874	2	1	1	1	1	1	1	1	1	1	1	1	1	1	1	1	1	1	1	1	1
1	875	2	1	1	1	1	1	1	1	1	1	1	1	1	1	1	1	1	1	1	1	1
1	876	2	1	1	1	1	1	1	1	1	1	1	1	1	1	1	1	1	1	1	1	1
1	877	2	1	1	1	1	1	1	1	1	1	1	1	1	1	1	1	1	1	1	1	1
14	880	2	14	14	14	14	14	14	14	14	14	14	14	14	14	14	14	14	14	14	14	14
23	882	2	23	23	23	23	23	23	23	23	23	23	23	23	23	23	23	23	23	23	23	23
2	883	2	2	1	1	1	1	1	1	1	1	1	1	1	1	1	1	1	1	1	1	1
2	884	2	2	1	1	1	2	3	3	3	4	5	5	6	6	6	6	6	6	6	6	6
11	885	2	11	11	11	11	11	11	11	11	11	11	8	8	8	8	8	8	8	9	9	9
6	886	2	6	6	6	6	6	5	6	6	7	8	10	11	11	11	11	9	9	9	10	11
7	887	2	7	7	7	7	7	7	2	2	2	2	2	2	2	2	2	2	2	2	2	2
1	888	2	1	1	1	1	1	1	1	1	1	1	1	1	1	1	1	1	1	1	1	1
17	889	2	17	17	17	17	17	17	17	17	17	17	17	17	17	17	17	17	8	8	8	8
39	890	2	39	39	39	39	39	39	39	39	39	39	39	39	39	39	39	39	39	39	39	39
11	892	2	11	11	11	11	11	11	11	11	11	11	2	2	3	3	3	4	4	4	4	4
22	893	2	22	22	22	22	22	22	22	22	22	22	22	22	22	22	22	22	22	22	22	22
31	894	2	31	31	31	31	31	31	31	31	31	31	31	31	31	31	31	31	31	31	31	31
3	895	2	3	3	3	4	4	5	6	7	7	7	7	7	7	7	7	7	7	7	7	7
1	896	2	1	1	1	1	1	1	1	1	1	1	1	1	1	1	1	1	1	1	1	1
8	897	2	8	8	8	8	8	8	8	2	2	2	2	2	2	2	2	2	2	2	2	2
2	898	2	2	1	1	1	2	2	2	2	2	2	2	2	2	2	2	2	2	2	2	2
4	899	2	4	4	4	1	1	1	1	1	1	1	1	1	1	1	1	1	1	1	1	1
1	900	2	1	1	1	1	1	1	1	1	1	1	1	1	1	1	1	1	1	1	1	1
2	901	2	2	1	1	1	1	1	1	1	1	1	1	1	1	1	1	1	1	1	1	1
5	902	2	5	5	5	5	1	1	1	1	1	1	1	1	1	1	1	1	1	1	1	1
50	904	2	50	50	50	50	50	50	50	50	50	50	50	50	50	50	50	50	50	50	50	50
2	905	2	2	1	1	1	1	1	1	1	1	1	1	1	1	1	1	1	1	1	1	1
8	906	2	8	8	8	8	8	8	8	2	2	2	2	3	4	4	4	3	3	3	3	3
2	907	2	2	2	2	2	2	2	2	2	2	2	2	2	2	2	2	2	2	2	2	2
33	908	2	33	33	33	33	33	33	33	33	33	33	33	33	33	33	33	33	33	33	33	33
5	909	2	5	5	5	5	3	3	3	3	3	3	3	2	2	2	2	2	2	2	2	2
29	910	2	29	29	29	29	29	29	29	29	29	29	29	29	29	29	29	29	29	29	29	29
14	911	2	14	14	14	14	14	14	14	14	14	14	14	14	14	3	3	3	3	3	3	3
17	912	2	17	17	17	17	17	17	17	17	17	17	17	17	17	17	17	17	7	8	9	10
30	913	2	30	30	30	30	30	30	30	30	30	30	30	30	30	30	30	30	30	30	30	30
15	914	2	15	15	15	15	15	15	15	15	15	15	15	15	15	15	12	13	14	15	16	18
18	918	2	18	18	18	18	18	18	18	18	18	18	18	18	18	18	18	18	18	9	9	9
1	920	2	1	1	1	1	1	1	1	1	1	1	1	1	1	1	1	1	1	1	1	1
1	921	2	1	1	1	1	1	1	1	1	1	1	1	1	1	1	1	1	1	1	1	1
3	922	2	3	3	3	3	3	3	3	3	3	3	3	3	3	3	3	3	3	3	3	3
33	923	2	33	33	33	33	33	33	33	33	33	33	33	33	33	33	33	33	33	33	33	33
10	924	2	10	10	10	10	10	10	10	10	10	4	6	7	3	3	3	3	3	3	6	6
67	925	2	67	67	67	67	67	67	67	67	67	67	67	67	67	67	67	67	67	67	67	67
11	926	2	11	11	11	11	11	11	11	11	11	11	5	5	1	1	1	1	1	1	2	2
6	927	2	6	6	6	6	6	6	6	6	6	6	6	6	5	5	5	5	5	5	5	6
86	928	2	86	86	86	86	86	86	86	86	86	86	86	86	86	86	86	86	86	86	86	86
15	929	2	15	15	15	15	15	15	15	15	15	15	15	15	15	15	6	5	3	5	5	5
2	930	2	2	2	2	2	2	2	2	2	2	2	2	2	2	2	2	2	2	2	2	2
1	931	2	1	1	1	1	1	1	1	1	1	1	3	3	3	3	3	3	3	3	3	3
6	932	2	6	6	6	6	6	1	1	1	1	1	1	1	1	1	1	1	1	1	1	1
12	933	2	12	12	12	12	12	12	12	12	12	12	12	11	12	13	9	10	9	9	9	9
2	934	2	2	2	2	2	2	2	2	2	3	3	4	4	4	4	4	4	4	4	4	3
1	935	2	1	1	1	1	1	1	1	1	1	1	2	2	3	3	3	3	3	3	3	3
3	936	2	3	3	1	1	1	1	1	1	1	1	1	1	1	1	1	1	1	1	1	2
1	937	2	1	1	1	1	1	1	1	1	1	1	1	1	1	1	1	1	1	1	1	1
18	938	2	18	18	18	18	18	18	18	18	18	18	18	18	18	18	18	18	18	9	11	12
1	939	2	1	2	2	2	3	3	5	6	6	6	7	7	7	7	7	7	7	7	7	7
2	940	2	2	2	2	2	2	2	2	2	2	2	2	2	2	2	2	2	2	2	2	2
3	941	2	3	3	3	3	2	4	4	4	4	4	4	4	3	3	2	2	2	2	2	2
6	942	2	6	6	6	6	6	6	6	6	6	6	6	5	5	5	5	4	4	2	2	2
1	943	2	1	1	1	1	1	1	1	1	1	1	1	1	1	1	1	1	1	1	1	1
6	944	2	6	6	6	6	6	6	7	8	9	10	9	10	11	10	2	2	2	3	3	3
12	945	2	12	12	12	12	12	12	12	12	12	12	12	9	11	10	1	1	1	2	2	2
1	946	2	1	1	1	1	1	1	1	1	1	1	1	1	1	1	1	1	1	1	1	1
1	947	2	1	1	1	2	2	2	2	3	3	3	3	3	3	3	3	3	3	3	3	3
15	948	2	15	15	15	15	15	15	15	15	15	15	15	15	15	15	1	1	1	2	2	2
1	949	2	1	1	1	1	1	1	1	1	1	1	1	1	1	1	1	1	1	1	1	1
1	950	2	1	1	1	1	1	1	1	1	1	1	1	1	1	1	1	1	1	1	1	1
2	951	2	2	2	2	3	2	2	1	1	1	1	1	1	1	1	1	1	1	1	1	1
4	952	2	4	4	4	1	1	1	1	1	1	1	1	1	1	1	1	1	1	1	1	1
1	953	2	1	1	1	1	1	1	1	1	1	1	1	1	1	1	1	1	1	1	1	1
12	954	2	12	12	12	12	12	12	12	12	12	12	12	10	10	11	9	9	9	9	9	10
4	955	2	4	4	4	2	2	2	2	2	2	2	2	2	2	2	2	2	2	2	2	2
2	957	2	2	1	2	2	2	2	2	2	2	2	2	2	2	2	2	2	2	2	2	2
7	958	2	7	7	7	7	7	7	3	3	3	3	3	3	3	3	3	3	3	3	3	3
4	959	2	4	4	4	2	2	2	2	2	3	5	5	5	6	7	7	8	9	9	10	10
17	960	2	17	17	17	17	17	17	17	17	17	17	17	17	17	17	17	17	8	8	9	10
3	961	2	3	3	3	3	3	3	3	3	3	3	3	3	3	3	3	3	3	3	3	3
8	962	2	8	8	8	8	8	8	8	1	1	1	1	1	2	2	2	2	2	2	2	2
10	963	2	10	10	10	10	10	10	10	10	10	7	3	3	4	4	5	5	5	5	5	5
9	964	2	9	9	9	9	9	9	9	9	5	6	7	6	7	8	12	12	12	13	13	13
43	965	2	43	43	43	43	43	43	43	43	43	43	43	43	43	43	43	43	43	43	43	43
69	967	2	69	69	69	69	69	69	69	69	69	69	69	69	69	69	69	69	69	69	69	69
1	968	2	1	1	1	1	1	1	1	1	1	1	1	1	1	1	1	1	1	1	1	1
1	969	2	1	1	1	1	1	1	1	1	1	1	1	1	1	1	1	1	1	1	1	1
1	970	2	1	1	1	2	2	2	2	1	1	1	2	2	3	1	1	1	1	1	1	1
1	971	2	1	1	1	1	1	1	1	1	1	1	1	1	1	1	1	1	1	1	1	1
4	974	2	4	4	4	3	3	3	3	3	3	3	3	2	2	2	2	2	2	2	2	2
2	975	2	2	2	1	1	1	1	1	1	1	1	1	1	1	1	1	1	1	1	1	1
2	977	2	2	1	1	1	1	1	1	1	1	1	1	1	1	1	1	1	1	1	1	1
21	978	2	21	21	21	21	21	21	21	21	21	21	21	21	21	21	21	21	21	21	21	21
1	979	2	1	1	1	1	1	1	1	1	1	1	1	1	1	1	1	1	1	1	1	1
6	980	2	6	6	6	6	6	3	3	3	2	2	2	2	2	2	2	2	2	2	2	2
48	981	2	48	48	48	48	48	48	48	48	48	48	48	48	48	48	48	48	48	48	48	48
63	982	2	63	63	63	63	63	63	63	63	63	63	63	63	63	63	63	63	63	63	63	63
56	983	2	56	56	56	56	56	56	56	56	56	56	56	56	56	56	56	56	56	56	56	56
47	984	2	47	47	47	47	47	47	47	47	47	47	47	47	47	47	47	47	47	47	47	47
4	985	2	4	4	4	4	4	4	4	4	4	4	4	4	4	4	4	4	4	4	4	4
1	986	2	1	1	1	1	1	1	1	1	1	1	1	1	1	1	1	1	1	1	1	1
4	990	2	4	4	4	3	4	4	5	6	7	7	7	7	7	7	7	8	8	8	7	7
86	991	2	86	86	86	86	86	86	86	86	86	86	86	86	86	86	86	86	86	86	86	86
44	992	2	44	44	44	44	44	44	44	44	44	44	44	44	44	44	44	44	44	44	44	44
2	993	2	2	1	1	1	1	1	1	1	1	1	1	1	1	1	1	1	1	1	1	1
3	994	2	3	3	1	1	1	1	1	1	1	1	1	1	1	1	1	1	1	1	1	1
1	995	2	1	1	1	1	1	1	1	1	1	1	1	1	1	1	1	1	1	1	1	1
1	996	2	1	1	1	1	1	1	1	1	1	1	1	1	1	1	1	1	1	1	1	1
1	999	2	1	1	1	1	1	1	1	1	1	1	1	1	1	1	1	1	1	1	1	1
1	1000	2	1	1	1	1	1	1	1	1	1	1	1	1	1	1	1	1	1	1	1	1
1	1001	2	1	1	1	1	1	1	1	1	1	1	1	1	1	1	1	1	1	1	1	1
1	1002	2	1	1	1	1	1	1	1	1	1	1	1	1	1	1	1	1	1	1	1	1
8	1003	2	8	8	8	8	8	8	8	1	1	1	1	1	1	1	1	1	1	1	1	1
21	1005	2	21	21	21	21	21	21	21	21	21	21	21	21	21	21	21	21	21	21	21	21
146	1006	2	146	146	146	146	146	146	146	146	146	146	146	146	146	146	146	146	146	146	146	146
26	1007	2	26	26	26	26	26	26	26	26	26	26	26	26	26	26	26	26	26	26	26	26
1	1008	2	1	1	1	1	1	1	1	1	1	1	1	1	1	1	1	1	1	1	1	1
4	1009	2	4	4	4	1	1	1	1	1	1	1	1	1	1	1	1	1	1	1	1	1
2	1010	2	2	1	1	1	1	1	1	1	1	1	1	1	1	1	1	1	1	1	1	1
2	1011	2	2	1	1	1	1	1	1	1	1	1	1	1	1	1	1	1	1	1	1	1
5	1012	2	5	5	5	5	1	1	1	1	1	1	1	1	1	1	1	1	1	1	1	1
3	1013	2	3	3	1	1	1	1	1	1	1	1	1	1	1	1	1	1	1	1	1	1
3	1014	2	3	3	1	2	3	3	4	5	5	5	4	5	5	5	5	5	6	6	6	6
1	1015	2	1	1	1	1	1	1	1	1	1	1	1	1	1	1	1	1	1	1	1	1
5	1016	2	5	5	5	5	2	3	2	2	2	2	3	3	3	3	3	4	4	5	5	5
69	1017	2	69	69	69	69	69	69	69	69	69	69	69	69	69	69	69	69	69	69	69	69
4	1018	2	4	4	4	1	1	1	1	1	1	1	1	1	1	1	1	1	1	1	1	1
1	1019	2	1	2	3	4	5	5	5	5	6	7	7	7	7	7	7	7	7	7	7	7
2	1020	2	2	2	3	3	3	3	3	3	3	3	3	3	3	3	3	3	3	3	3	3
1	1021	2	1	1	1	1	1	1	1	1	1	1	1	1	1	1	1	1	1	1	1	1
1	1022	2	1	2	2	2	2	2	2	2	2	2	2	2	2	2	2	2	2	2	2	2
3	1023	2	3	3	2	1	1	1	1	1	1	1	1	1	1	1	1	1	1	1	1	1
10	1024	2	10	10	10	10	10	10	10	10	10	1	1	1	1	1	1	1	1	1	1	1
10	1027	2	10	10	10	10	10	10	10	10	10	10	10	10	10	10	10	10	10	10	10	10
3	1028	2	3	3	2	2	2	2	2	2	2	2	2	2	2	2	2	2	2	2	2	2
2	1029	2	2	1	2	3	3	3	4	6	6	6	6	7	8	9	10	12	14	15	16	17
5	1030	2	5	5	5	5	2	2	2	2	2	2	2	2	2	2	2	2	2	2	2	2
1	1031	2	1	2	3	1	3	3	3	3	3	3	3	3	3	3	3	3	3	3	3	3
3	1032	2	3	3	3	3	3	3	3	3	3	3	3	3	3	3	3	3	3	3	3	3
2	1033	2	2	2	2	2	2	2	2	2	2	2	2	2	2	2	2	2	2	2	2	2
3	1034	2	3	3	1	1	1	1	1	1	1	1	1	1	1	1	1	1	1	1	1	1
1	1036	2	1	1	1	1	1	1	1	1	1	1	1	1	1	1	1	1	1	1	1	1
12	1037	2	12	12	12	12	12	12	12	12	12	12	12	6	6	6	6	1	1	1	1	1
7	1038	2	7	7	7	7	7	7	1	1	1	1	1	2	3	3	3	3	3	3	4	4
20	1039	2	20	20	20	20	20	20	20	20	20	20	20	20	20	20	20	20	20	20	20	4
21	1040	2	21	21	21	21	21	21	21	21	21	21	21	21	21	21	21	21	21	21	21	21
2	1042	2	2	2	2	2	2	2	2	2	2	2	2	2	2	2	2	2	2	2	2	2
8	1043	2	8	8	8	8	8	8	8	4	5	6	5	5	5	5	5	5	5	5	5	5
3	1044	2	3	3	2	2	2	2	2	2	3	3	3	3	3	3	3	3	3	3	3	3
148	1045	2	148	148	148	148	148	148	148	148	148	148	148	148	148	148	148	148	148	148	148	148
114	1046	2	114	114	114	114	114	114	114	114	114	114	114	114	114	114	114	114	114	114	114	114
11	1047	2	11	11	11	11	11	11	11	11	11	11	6	6	7	8	9	10	11	12	9	9
12	1048	2	12	12	12	12	12	12	12	12	12	12	12	2	2	2	2	2	2	2	2	3
72	1049	2	72	72	72	72	72	72	72	72	72	72	72	72	72	72	72	72	72	72	72	72
3	1050	2	3	3	1	1	1	1	1	1	1	1	1	1	2	3	3	3	3	3	1	1
5	1052	2	5	5	5	5	3	3	2	3	4	6	7	8	8	9	9	9	9	8	8	10
3	1053	2	3	3	2	2	2	2	2	2	2	2	2	2	2	2	2	2	2	2	2	2
2	1054	2	2	2	3	3	3	3	3	3	3	3	3	3	3	3	3	3	3	3	3	3
3	1055	2	3	3	2	2	2	2	2	2	2	2	2	2	2	2	2	2	2	2	2	2
11	1056	2	11	11	11	11	11	11	11	11	11	11	7	5	5	7	6	6	6	6	7	7
1	1057	2	1	1	1	1	1	1	1	1	1	1	1	1	1	1	1	1	1	1	1	1
19	1058	2	19	19	19	19	19	19	19	19	19	19	19	19	19	19	19	19	19	19	1	1
3	1059	2	3	3	1	1	1	1	1	1	1	1	1	1	1	1	1	1	1	1	1	1
14	1060	2	14	14	14	14	14	14	14	14	14	14	14	14	14	3	4	4	4	4	4	4
5	1061	2	5	5	5	5	5	6	6	6	7	7	7	7	7	5	5	5	5	6	1	1
53	1062	2	53	53	53	53	53	53	53	53	53	53	53	53	53	53	53	53	53	53	53	53
16	1063	2	16	16	16	16	16	16	16	16	16	16	16	16	16	16	16	1	1	1	1	1
78	1064	2	78	78	78	78	78	78	78	78	78	78	78	78	78	78	78	78	78	78	78	78
2	1065	2	2	2	2	2	2	2	2	2	2	2	2	2	2	2	2	2	2	2	2	2
5	1066	2	5	5	5	5	3	3	2	2	2	2	2	2	2	2	2	2	2	2	2	2
1	1067	2	1	1	1	1	1	3	3	3	4	4	5	5	5	5	5	5	5	5	5	5
1	1068	2	1	1	1	1	1	1	1	1	1	1	1	1	1	1	1	1	1	1	1	1
1	1069	2	1	1	1	1	1	1	1	1	1	1	1	1	1	1	1	1	1	1	1	1
2	1070	2	2	1	1	1	1	1	1	1	1	1	1	1	1	1	1	1	1	1	1	1
7	1071	2	7	7	7	7	7	7	7	7	7	7	7	7	7	1	1	1	1	1	1	1
8	1072	2	8	8	8	8	8	8	8	8	8	9	2	2	2	2	2	2	2	2	2	2
5	1073	2	5	5	5	5	1	1	1	1	1	1	1	1	1	1	1	1	2	4	4	4
1	1074	2	1	1	1	1	1	1	1	1	1	1	1	1	1	1	1	1	1	1	1	1
7	1075	2	7	7	7	7	7	7	2	2	2	2	2	2	2	2	2	2	2	2	2	2
1	1076	2	1	1	1	1	1	1	1	1	1	1	1	1	1	1	1	1	1	1	1	1
1	1077	2	1	1	1	1	1	1	1	1	1	1	1	1	1	1	1	1	1	1	1	1
2	1078	2	2	2	2	2	4	4	6	7	8	9	10	11	12	13	14	15	16	17	19	20
31	1079	2	31	31	31	31	31	31	31	31	31	31	31	31	31	31	31	31	31	31	31	31
1	1080	2	1	1	1	1	1	1	1	1	1	1	1	1	1	1	1	1	1	1	1	1
1	1081	2	1	1	1	1	1	1	1	1	1	1	1	1	1	1	1	1	1	1	1	1
7	1082	2	7	7	7	7	7	7	3	2	3	4	2	4	4	4	4	4	4	5	5	5
2	1083	2	2	1	1	1	1	1	1	1	1	1	1	1	1	1	1	1	1	1	1	1
1	1084	2	1	1	1	1	1	1	1	1	1	1	1	1	1	1	1	1	1	1	1	1
1	1085	2	1	1	1	1	1	1	1	1	1	1	1	1	1	1	1	1	1	1	1	1
4	1086	2	4	4	4	1	1	1	2	2	2	2	2	2	2	2	2	2	2	2	2	2
1	1088	2	1	1	1	1	1	1	1	1	1	1	1	1	1	1	1	1	1	1	1	1
1	1089	2	1	1	1	1	1	1	1	1	1	1	1	1	1	1	1	1	1	1	1	1
14	1090	2	14	14	14	14	14	14	14	14	14	14	14	14	14	14	14	15	16	16	18	20
3	1091	2	3	3	3	3	3	4	2	4	5	4	4	5	4	4	4	5	5	5	5	5
11	1092	2	11	11	11	11	11	11	11	11	11	11	2	2	2	2	3	3	3	3	3	3
1	1093	2	1	1	1	1	1	1	1	1	1	1	1	1	1	1	1	1	1	1	1	1
1	1094	2	1	1	1	1	1	1	2	3	7	7	7	7	7	8	8	8	8	9	10	10
1	1095	2	1	1	1	1	1	1	1	1	1	1	1	1	1	1	1	1	1	1	1	1
1	1096	2	1	1	1	1	1	1	1	1	1	1	1	1	1	1	1	1	1	1	1	1
6	1097	2	6	6	6	6	6	1	1	1	1	1	1	1	1	1	1	1	1	1	1	1
1	1098	2	1	1	1	1	1	1	1	1	1	1	1	1	1	1	1	1	1	1	1	1
4	1099	2	4	4	4	3	4	5	5	5	5	5	5	5	5	5	5	5	5	5	5	5
1	1100	2	1	1	1	1	1	1	1	1	1	1	1	1	1	1	1	1	1	1	1	1
1	1101	2	1	1	1	1	1	1	1	1	1	1	1	1	1	1	1	1	1	1	1	1
2	1103	2	2	2	3	3	3	3	3	3	3	3	3	3	3	3	3	4	4	4	4	4
4	1104	2	4	4	4	1	1	2	1	1	1	1	1	1	1	1	1	1	1	1	1	1
2	1105	2	2	2	2	2	2	2	2	2	2	1	1	1	1	1	1	1	1	1	1	1
10	1106	2	10	10	10	10	10	10	10	10	10	1	1	1	1	1	1	1	1	1	1	1
2	1107	2	2	1	1	1	1	1	1	1	1	1	1	1	1	1	1	1	1	2	2	2
4	1108	2	4	4	4	1	1	1	1	1	1	1	1	1	1	1	1	1	1	1	1	1
1	1109	2	1	1	1	1	1	1	1	1	1	1	1	1	1	1	1	1	1	1	1	1
1	1110	2	1	1	1	1	1	1	1	1	1	1	1	1	1	1	1	1	1	1	1	1
1	1111	2	1	1	1	1	1	1	1	1	1	1	1	1	1	1	1	1	1	1	1	1
1	1112	2	1	1	1	1	1	1	1	1	1	1	1	1	1	1	1	1	1	1	1	1
5	1114	2	5	5	5	5	4	6	6	7	7	8	9	9	11	12	13	14	15	16	16	6
22	1115	2	22	22	22	22	22	22	22	22	22	22	22	22	22	22	22	22	22	22	22	22
16	1116	2	16	16	16	16	16	16	16	16	16	16	16	16	16	16	16	10	11	13	13	12
1	1120	2	1	1	1	1	1	1	1	1	1	1	1	1	1	1	1	1	1	1	1	1
6	1121	2	6	6	6	6	6	6	6	6	6	7	7	7	7	7	7	7	7	8	8	8
6	1123	2	6	6	6	6	6	6	6	6	6	6	6	6	6	6	6	6	6	6	6	6
4	1124	2	4	4	4	4	4	4	5	6	6	7	7	7	7	7	7	7	7	7	7	7
10	1125	2	10	10	10	10	10	10	10	10	10	5	6	7	7	7	7	7	7	7	7	7
18	1127	2	18	18	18	18	18	18	18	18	18	18	18	18	18	18	18	18	18	2	2	2
27	1129	2	27	27	27	27	27	27	27	27	27	27	27	27	27	27	27	27	27	27	27	27
114	1130	2	114	114	114	114	114	114	114	114	114	114	114	114	114	114	114	114	114	114	114	114
4	1133	2	4	4	4	4	4	4	3	3	3	3	3	3	3	3	3	3	3	3	3	3
2	1134	2	2	2	2	2	2	2	2	2	2	2	2	2	2	2	2	2	2	2	2	2
2	1135	2	2	1	1	1	1	1	1	1	1	1	1	1	1	1	1	1	1	1	1	1
14	1136	2	14	14	14	14	14	14	14	14	14	14	14	14	14	1	1	1	1	1	1	1
32	1137	2	32	32	32	32	32	32	32	32	32	32	32	32	32	32	32	32	32	32	32	32
6	1138	2	6	6	6	6	6	3	4	4	4	4	4	4	4	3	3	3	3	4	4	4
18	1139	2	18	18	18	18	18	18	18	18	18	18	18	18	18	18	18	18	18	2	2	2
9	1140	2	9	9	9	9	9	9	9	9	8	8	8	8	7	7	7	7	8	8	8	8
8	1141	2	8	8	8	8	8	8	8	8	9	10	10	10	10	10	10	10	1	1	1	1
10	1143	2	10	10	10	10	10	10	10	10	10	10	11	12	12	12	12	12	12	12	12	12
3	1144	2	3	3	1	1	1	1	1	1	1	1	1	1	1	1	1	1	1	1	1	1
1	1145	2	1	1	1	1	1	2	1	1	1	1	1	1	1	1	1	1	1	1	1	1
2	1146	2	2	2	2	2	2	2	2	3	3	3	3	3	3	3	3	3	3	3	3	3
1	1147	2	1	1	1	1	2	2	2	2	2	2	2	2	2	2	3	4	4	4	4	4
1	1148	2	1	1	1	1	1	1	1	1	1	1	1	1	1	1	1	1	1	1	1	1
1	1149	2	1	1	1	1	1	1	1	1	1	1	1	1	1	1	1	1	1	1	1	1
33	1150	2	33	33	33	33	33	33	33	33	33	33	33	33	33	33	33	33	33	33	33	33
10	1151	2	10	10	10	10	10	10	10	10	10	9	9	9	9	9	9	9	9	9	9	9
11	1152	2	11	11	11	11	11	11	11	11	11	11	1	1	1	1	1	1	1	1	1	1
1	1153	2	1	1	1	1	1	1	1	1	1	1	1	1	1	1	1	1	1	1	1	1
1	1154	2	1	1	1	1	1	1	1	1	1	1	1	1	1	1	1	1	1	1	1	1
2	1155	2	2	2	2	2	2	2	2	2	2	2	2	1	1	1	1	1	1	1	1	1
1	1156	2	1	1	1	1	1	1	1	1	1	1	1	1	1	1	1	1	1	1	1	1
19	1157	2	19	19	19	19	19	19	19	19	19	19	19	19	19	19	19	19	19	19	15	16
3	1158	2	3	3	1	1	1	2	3	3	3	3	3	3	4	4	4	4	4	4	4	5
5	1159	2	5	5	5	5	3	3	4	6	6	7	8	9	10	10	10	10	10	10	10	10
35	1160	2	35	35	35	35	35	35	35	35	35	35	35	35	35	35	35	35	35	35	35	35
17	1161	2	17	17	17	17	17	17	17	17	17	17	17	17	17	17	17	17	1	1	1	1
114	1162	2	114	114	114	114	114	114	114	114	114	114	114	114	114	114	114	114	114	114	114	114
1	1163	2	1	1	1	1	1	1	1	1	3	6	6	6	7	7	7	7	7	7	7	7
2	1164	2	2	2	2	2	2	2	2	3	4	7	7	7	3	3	3	3	3	3	3	3
2	1165	2	2	2	2	2	2	3	2	2	2	2	2	2	2	2	2	2	2	2	2	2
3	1166	2	3	3	3	3	2	2	2	2	2	2	2	2	2	2	2	2	2	2	2	2
16	1167	2	16	16	16	16	16	16	16	16	16	16	16	16	16	16	16	1	1	1	1	1
8	1168	2	8	8	8	8	8	8	8	5	5	5	5	5	5	5	4	1	1	1	1	1
1	1169	2	1	1	1	1	1	1	1	1	1	1	1	1	1	1	1	1	1	1	1	1
4	1170	2	4	4	4	3	3	2	2	2	2	2	2	2	2	2	2	2	2	2	3	3
1	1171	2	1	1	1	1	1	1	1	1	1	1	1	1	1	1	1	1	1	1	1	1
46	1172	2	46	46	46	46	46	46	46	46	46	46	46	46	46	46	46	46	46	46	46	46
1	1173	2	1	1	1	1	1	1	1	1	1	1	1	1	1	1	1	1	1	1	1	1
1	1175	2	1	1	1	1	1	1	1	1	1	1	1	1	1	1	1	1	1	1	1	1
1	1176	2	1	2	2	2	2	2	2	2	2	2	2	2	2	2	2	2	2	2	2	2
4	1177	2	4	4	4	1	1	1	1	1	1	1	1	1	1	1	1	1	1	1	1	1
45	1178	2	45	45	45	45	45	45	45	45	45	45	45	45	45	45	45	45	45	45	45	45
1	1179	2	1	1	1	1	1	1	1	1	1	1	1	1	1	1	1	1	1	1	1	1
2	1180	2	2	1	1	1	1	1	1	1	1	1	1	1	1	1	1	1	1	1	1	1
1	1181	2	1	1	1	1	1	1	1	1	1	1	1	1	1	1	1	1	1	1	1	1
4	1182	2	4	4	4	4	4	5	6	6	6	4	4	4	4	4	4	4	4	5	5	6
5	1183	2	5	5	5	5	2	2	2	3	3	3	3	3	3	3	3	3	3	3	3	3
1	1184	2	1	1	1	1	1	1	1	1	1	1	1	1	1	1	1	1	1	1	1	1
1	1185	2	1	1	1	1	1	1	1	1	1	1	1	1	1	1	1	1	1	1	1	1
1	1186	2	1	1	1	1	1	1	1	1	1	1	1	1	1	1	1	1	1	1	1	1
1	1187	2	1	1	1	1	1	1	1	1	1	1	1	1	1	1	1	1	1	1	1	1
8	1189	2	8	8	8	8	8	8	8	3	3	3	5	5	4	4	4	4	5	5	5	5
4	1191	2	4	4	4	2	2	3	3	3	3	3	3	3	3	3	3	3	3	3	7	7
32	1192	2	32	32	32	32	32	32	32	32	32	32	32	32	32	32	32	32	32	32	32	32
6	1193	2	6	6	6	6	6	4	7	8	8	9	10	10	10	10	10	10	11	11	11	12
1	1194	2	1	1	1	1	1	1	1	1	1	1	1	1	1	1	1	1	1	1	1	1
6	1195	2	6	6	6	6	6	5	7	7	8	8	8	3	4	4	4	5	4	5	6	7
4	1197	2	4	4	4	1	1	1	1	1	1	1	1	1	2	2	3	3	3	4	4	4
17	1198	2	17	17	17	17	17	17	17	17	17	17	17	17	17	17	17	17	12	11	11	11
9	1199	2	9	9	9	9	9	9	9	9	8	9	9	9	10	11	11	11	11	11	11	11
11	1200	2	11	11	11	11	11	11	11	11	11	11	11	11	11	11	11	11	11	11	11	11
5	1201	2	5	5	5	5	1	1	1	1	1	1	1	1	2	2	2	2	2	3	3	3
2	1202	2	2	2	2	1	1	1	1	1	2	2	2	1	2	2	2	2	2	2	2	2
5	1203	2	5	5	5	5	2	3	4	5	6	7	7	8	9	10	11	11	12	13	14	15
18	1204	2	18	18	18	18	18	18	18	18	18	18	18	18	18	18	18	18	18	2	2	2
9	1205	2	9	9	9	9	9	9	9	9	1	1	1	1	1	1	1	1	1	1	1	2
1	1206	2	1	1	1	1	1	1	1	1	1	1	1	1	1	1	1	1	1	1	1	1
21	1207	2	21	21	21	21	21	21	21	21	21	21	21	21	21	21	21	21	21	21	21	21
1	1208	2	1	1	1	1	1	1	2	2	2	2	2	2	2	2	2	2	2	3	3	3
31	1209	2	31	31	31	31	31	31	31	31	31	31	31	31	31	31	31	31	31	31	31	31
3	1210	2	3	3	3	3	1	1	1	1	1	1	1	1	1	1	1	1	1	1	1	1
18	1211	2	18	18	18	18	18	18	18	18	18	18	18	18	18	18	18	18	18	13	13	13
7	1212	2	7	7	7	7	7	7	1	1	2	2	2	2	2	2	2	2	2	2	2	2
1	1214	2	1	1	1	1	1	1	1	1	1	1	1	1	1	1	1	1	1	1	1	1
2	1215	2	2	1	1	1	1	1	1	1	1	1	1	1	1	1	1	1	1	1	1	1
1	1216	2	1	1	1	1	1	1	1	1	1	1	1	1	1	1	1	1	1	1	1	1
1	1217	2	1	1	1	1	1	1	1	1	1	1	1	1	1	1	1	1	1	1	1	1
2	1218	2	2	1	1	1	1	1	1	1	1	1	1	1	1	1	1	1	1	1	1	1
2	1219	2	2	1	1	1	1	1	1	1	1	1	1	1	1	1	1	1	1	1	1	1
4	1220	2	4	4	4	3	3	3	3	3	3	3	3	3	3	3	3	3	3	3	3	3
9	1221	3	9	9	9	9	9	9	9	9	8	8	9	10	10	10	10	10	10	10	10	10
8	1222	3	8	8	8	8	8	8	8	3	3	1	1	1	1	1	1	1	1	1	1	1
1	1223	3	1	1	1	1	1	1	1	1	1	1	1	1	1	1	1	1	1	1	1	1
2	1224	3	2	1	1	2	2	2	2	2	2	2	3	3	4	4	5	5	5	5	1	1
3	1225	3	3	3	1	1	1	1	1	1	1	1	1	1	1	1	1	1	1	1	1	1
2	1226	3	2	2	2	1	1	1	1	1	1	1	1	1	1	1	1	1	1	1	1	1
4	1227	3	4	4	4	1	2	2	2	2	2	2	2	2	2	2	2	2	2	2	2	2
3	1228	3	3	3	3	1	2	2	2	2	2	2	2	2	2	2	2	2	2	2	2	2
2	1229	3	2	1	1	1	1	1	1	1	1	1	1	1	1	1	1	1	1	1	1	1
1	1230	3	1	2	2	2	2	2	2	2	3	3	3	3	3	3	3	3	3	3	3	3
5	1231	3	5	5	5	5	2	2	2	2	2	2	2	2	2	2	2	2	2	2	2	2
20	1232	3	20	20	20	20	20	20	20	20	20	20	20	20	20	20	20	20	20	20	20	1
38	1233	3	38	38	38	38	38	38	38	38	38	38	38	38	38	38	38	38	38	38	38	38
6	1234	3	6	6	6	6	6	1	1	1	1	1	1	1	1	1	1	1	1	1	1	1
10	1235	3	10	10	10	10	10	10	10	10	10	9	10	10	10	10	10	10	10	10	10	10
1	1237	3	1	1	1	1	1	1	1	1	1	1	1	1	1	1	1	1	1	1	1	1
20	1239	3	20	20	20	20	20	20	20	20	20	20	20	20	20	20	20	20	20	20	20	3
1	1240	3	1	1	1	1	1	2	2	2	2	2	2	2	2	2	2	2	2	2	1	1
18	1241	3	18	18	18	18	18	18	18	18	18	18	18	18	18	18	18	18	18	16	17	18
1	1242	3	1	1	1	1	1	1	1	1	1	1	1	1	1	1	1	1	1	1	1	1
1	1244	3	1	1	1	1	1	1	1	1	1	1	1	1	1	1	1	1	1	1	1	1
6	1245	3	6	6	6	6	6	4	4	4	4	4	4	4	4	4	4	4	4	4	4	4
10	1246	3	10	10	10	10	10	10	10	10	10	4	4	3	3	3	4	4	4	4	4	1
4	1247	3	4	4	4	4	4	4	4	4	4	4	4	4	4	4	4	4	4	4	4	4
6	1248	3	6	6	6	6	6	6	7	8	9	5	5	5	5	5	5	5	6	6	6	2
1	1249	3	1	1	2	2	2	2	2	2	2	2	2	2	2	2	2	2	2	2	2	2
32	1250	3	32	32	32	32	32	32	32	32	32	32	32	32	32	32	32	32	32	32	32	32
4	1251	3	4	4	4	4	4	4	4	4	4	4	4	4	4	4	4	4	4	4	4	4
1	1252	3	1	1	1	1	1	1	1	1	1	1	1	1	1	1	1	1	1	1	1	1
1	1253	3	1	1	1	1	1	1	1	1	1	1	1	1	1	1	1	1	1	1	1	1
10	1254	3	10	10	10	10	10	10	10	10	10	10	11	6	6	6	7	9	10	8	8	8
1	1255	3	1	1	1	1	1	1	1	1	1	1	1	1	1	1	1	1	1	1	1	1
1	1256	3	1	1	1	1	1	1	1	1	1	1	1	1	1	1	1	1	1	1	1	1
1	1257	3	1	1	1	1	1	1	1	1	1	1	1	1	2	3	3	3	3	4	4	4
47	1258	3	47	47	47	47	47	47	47	47	47	47	47	47	47	47	47	47	47	47	47	47
5	1260	3	5	5	5	5	5	5	5	5	5	5	5	5	5	5	5	5	5	5	5	5
9	1262	3	9	9	9	9	9	9	9	9	2	1	1	1	1	1	1	1	1	1	1	1
1	1263	3	1	1	2	3	3	3	3	3	3	3	4	4	4	4	4	4	4	4	4	4
22	1264	3	22	22	22	22	22	22	22	22	22	22	22	22	22	22	22	22	22	22	22	22
5	1265	3	5	5	5	5	4	4	4	4	6	7	8	9	9	9	9	10	10	11	12	12
1	1266	3	1	1	1	1	1	1	1	1	1	1	1	1	1	1	1	1	1	1	1	1
1	1267	3	1	1	1	1	1	1	1	1	1	1	1	1	1	1	1	1	1	1	1	1
2	1268	3	2	1	1	1	1	1	1	1	1	1	1	1	1	1	1	1	1	1	1	1
4	1269	3	4	4	4	3	1	2	2	2	3	4	4	4	3	5	5	5	5	5	5	5
20	1270	3	20	20	20	20	20	20	20	20	20	20	20	20	20	20	20	20	20	20	20	2
99	1271	3	99	99	99	99	99	99	99	99	99	99	99	99	99	99	99	99	99	99	99	99
5	1272	3	5	5	5	5	1	1	1	1	1	1	1	1	1	1	1	1	1	1	1	1
10	1273	3	10	10	10	10	10	10	10	10	10	1	2	2	2	2	2	2	2	2	2	2
2	1274	3	2	2	2	2	2	1	1	1	1	1	1	1	1	1	1	1	1	1	1	1
9	1275	3	9	9	9	9	9	9	9	9	1	1	1	1	1	1	1	1	1	1	1	1
3	1276	3	3	3	1	1	1	1	1	1	1	1	1	1	1	1	1	1	1	1	1	1
9	1277	3	9	9	9	9	9	9	9	9	6	7	7	10	10	10	12	12	14	14	14	7
17	1279	3	17	17	17	17	17	17	17	17	17	17	17	17	17	17	17	17	3	3	3	3
4	1280	3	4	4	4	4	4	4	4	3	3	3	3	3	3	3	3	3	3	3	3	3
8	1281	3	8	8	8	8	8	8	8	6	6	6	6	6	6	6	6	6	6	6	6	6
1	1282	3	1	1	1	1	1	1	1	1	1	1	1	1	1	1	1	1	1	1	1	1
11	1283	3	11	11	11	11	11	11	11	11	11	11	2	4	4	4	4	4	4	4	6	6
10	1284	3	10	10	10	10	10	10	10	10	10	5	5	5	5	5	5	5	5	5	5	5
1	1285	3	1	1	1	1	1	1	1	1	1	1	1	1	1	1	1	1	1	1	1	1
1	1286	3	1	1	1	1	1	1	1	1	1	1	1	1	1	1	1	1	1	1	1	1
3	1287	3	3	3	1	1	1	1	1	1	1	1	1	1	1	1	1	1	1	1	1	1
18	1289	3	18	18	18	18	18	18	18	18	18	18	18	18	18	18	18	18	18	1	1	2
1	1290	3	1	1	1	1	1	1	1	1	1	1	1	1	2	2	2	2	2	3	3	3
56	1291	3	56	56	56	56	56	56	56	56	56	56	56	56	56	56	56	56	56	56	56	56
5	1292	3	5	5	5	5	5	5	6	7	8	8	9	10	10	11	12	12	12	12	12	13
6	1293	3	6	6	6	6	6	5	5	5	5	5	5	5	5	5	5	5	5	5	5	5
10	1294	3	10	10	10	10	10	10	10	10	10	1	1	1	1	1	1	1	1	1	1	1
1	1295	3	1	1	1	1	1	1	1	1	2	2	2	2	2	2	2	2	2	2	2	2
11	1296	3	11	11	11	11	11	11	11	11	11	11	10	11	12	13	15	16	17	18	19	17
7	1298	3	7	7	7	7	7	7	6	6	7	8	9	10	11	12	13	13	3	2	2	2
1	1299	3	1	1	3	4	5	5	5	5	5	5	5	5	5	5	5	5	5	4	4	4
1	1301	3	1	2	3	4	5	5	5	5	5	5	5	5	5	5	5	5	5	5	5	5
11	1302	3	11	11	11	11	11	11	11	11	11	11	10	11	11	11	11	11	11	11	11	11
44	1303	3	44	44	44	44	44	44	44	44	44	44	44	44	44	44	44	44	44	44	44	44
4	1304	3	4	4	4	3	1	1	1	1	1	1	1	1	1	1	1	1	2	2	2	2
11	1305	3	11	11	11	11	11	11	11	11	11	11	1	1	1	1	1	1	1	1	1	1
41	1306	3	41	41	41	41	41	41	41	41	41	41	41	41	41	41	41	41	41	41	41	41
1	1307	3	1	1	1	1	1	1	1	1	1	1	1	1	1	1	1	1	1	1	1	1
16	1308	3	16	16	16	16	16	16	16	16	16	16	16	16	16	16	16	13	13	13	13	13
4	1311	3	4	4	4	2	3	3	3	2	2	2	3	3	4	3	3	3	3	3	3	3
8	1312	3	8	8	8	8	8	8	8	6	4	4	4	4	4	5	5	6	6	5	5	3
9	1313	3	9	9	9	9	9	9	9	9	3	3	3	3	3	4	2	2	2	2	3	3
17	1314	3	17	17	17	17	17	17	17	17	17	17	17	17	17	17	17	17	1	1	1	1
95	1315	3	95	95	95	95	95	95	95	95	95	95	95	95	95	95	95	95	95	95	95	95
8	1316	3	8	8	8	8	8	8	8	7	7	7	7	7	7	7	7	7	7	7	7	7
4	1317	3	4	4	4	3	3	3	3	3	3	3	3	3	3	3	3	3	3	3	3	3
4	1318	3	4	4	4	3	3	3	3	3	3	3	3	3	3	3	3	3	3	3	3	3
40	1319	3	40	40	40	40	40	40	40	40	40	40	40	40	40	40	40	40	40	40	40	40
10	1320	3	10	10	10	10	10	10	10	10	10	8	8	8	8	8	8	8	8	8	8	8
2	1321	3	2	1	1	1	1	1	2	2	1	1	1	1	1	1	1	1	1	1	1	1
19	1322	3	19	19	19	19	19	19	19	19	19	19	19	19	19	19	19	19	19	19	8	8
18	1323	3	18	18	18	18	18	18	18	18	18	18	18	18	18	18	18	18	18	13	13	13
7	1324	3	7	7	7	7	7	7	4	5	6	6	7	8	9	9	9	9	10	11	12	13
1	1325	3	1	1	1	1	1	1	1	1	1	1	1	1	1	1	1	1	1	1	1	1
1	1326	3	1	1	2	2	3	5	6	7	8	8	8	9	9	10	11	12	12	13	14	15
4	1327	3	4	4	4	3	3	3	3	3	3	3	3	4	4	5	4	4	4	5	5	5
3	1328	3	3	3	3	3	3	4	4	4	4	4	5	5	5	5	5	5	6	7	8	8
1	1329	3	1	1	3	4	3	3	3	3	3	3	3	3	3	3	3	3	3	3	3	3
10	1330	3	10	10	10	10	10	10	10	10	10	10	10	10	10	10	10	10	10	10	10	10
4	1332	3	4	4	4	3	4	6	7	8	8	8	8	8	8	8	8	8	8	8	8	8
1	1333	3	1	1	1	1	1	1	1	1	1	1	1	1	1	1	1	1	1	1	1	1
5	1334	3	5	5	5	5	2	2	2	2	2	2	2	2	2	2	2	2	2	2	2	2
3	1335	3	3	3	1	1	1	1	1	1	1	1	1	1	1	1	1	1	1	1	1	1
1	1337	3	1	1	1	1	1	1	1	1	1	1	1	1	1	1	1	1	1	1	1	1
30	1338	3	30	30	30	30	30	30	30	30	30	30	30	30	30	30	30	30	30	30	30	30
1	1339	3	1	2	2	2	2	2	2	2	2	2	2	2	2	2	2	2	2	2	2	2
2	1340	3	2	2	2	2	2	3	3	3	3	3	3	3	3	3	3	3	3	3	3	3
40	1341	3	40	40	40	40	40	40	40	40	40	40	40	40	40	40	40	40	40	40	40	40
43	1344	3	43	43	43	43	43	43	43	43	43	43	43	43	43	43	43	43	43	43	43	43
3	1345	3	3	3	2	2	2	2	2	2	2	2	2	2	2	2	2	2	2	2	2	2
10	1346	3	10	10	10	10	10	10	10	10	10	1	1	1	1	1	1	1	1	1	1	1
1	1347	3	1	1	2	3	5	3	4	5	6	1	1	1	1	1	1	1	1	1	1	1
5	1349	3	5	5	5	5	4	5	5	5	5	5	5	5	5	5	5	5	5	5	5	5
15	1350	3	15	15	15	15	15	15	15	15	15	15	15	15	15	15	1	1	1	1	1	1
70	1351	3	70	70	70	70	70	70	70	70	70	70	70	70	70	70	70	70	70	70	70	70
39	1352	3	39	39	39	39	39	39	39	39	39	39	39	39	39	39	39	39	39	39	39	39
1	1353	3	1	1	1	1	1	1	1	1	1	1	1	1	1	1	1	1	1	1	1	1
4	1354	3	4	4	4	2	2	2	2	2	2	2	2	2	2	2	2	2	2	2	2	2
12	1355	3	12	12	12	12	12	12	12	12	12	12	12	1	1	1	1	1	1	1	1	1
3	1356	3	3	3	1	1	1	1	1	2	2	2	2	2	2	2	2	2	2	2	2	2
3	1357	3	3	3	1	1	1	1	1	1	1	1	1	1	1	1	1	1	1	1	1	1
4	1358	3	4	4	4	1	1	1	1	1	1	1	1	1	1	1	1	1	1	1	1	1
4	1359	3	4	4	4	1	1	1	1	1	1	1	1	1	1	1	1	1	1	1	1	1
14	1360	3	14	14	14	14	14	14	14	14	14	14	14	14	14	1	1	1	1	5	5	5
2	1361	3	2	1	1	1	1	1	1	1	1	1	1	1	1	1	1	1	1	1	1	1
3	1362	3	3	3	1	1	1	1	1	1	1	1	1	1	1	1	1	1	1	1	1	1
5	1363	3	5	5	5	5	1	1	1	1	1	1	1	1	1	1	1	1	1	1	1	1
8	1364	3	8	8	8	8	8	8	8	2	2	2	2	2	2	2	2	2	2	2	2	2
4	1365	3	4	4	4	1	1	1	1	1	1	1	1	1	1	1	1	1	1	1	1	1
6	1366	3	6	6	6	6	6	2	2	2	2	2	2	2	2	2	2	2	2	2	2	2
2	1367	3	2	1	1	1	1	1	1	1	1	1	1	1	1	1	1	1	1	1	1	1
6	1368	3	6	6	6	6	6	3	3	3	3	3	3	3	3	3	3	3	3	3	3	3
2	1369	3	2	1	1	1	1	1	1	1	1	1	1	1	1	1	1	1	1	1	1	1
1	1370	3	1	1	2	3	3	4	5	5	5	5	5	5	5	5	5	5	5	5	5	5
10	1371	3	10	10	10	10	10	10	10	10	10	2	2	2	2	2	2	2	2	2	2	2
2	1372	3	2	1	1	1	1	1	1	1	1	1	1	1	1	1	1	1	1	1	1	1
3	1373	3	3	3	2	2	2	2	2	2	2	2	2	2	2	2	2	2	2	2	2	2
16	1374	3	16	16	16	16	16	16	16	16	16	16	16	16	16	16	16	5	5	5	5	5
1	1375	3	1	1	1	1	1	1	1	1	1	1	1	1	1	1	1	1	1	1	1	1
9	1376	3	9	9	9	9	9	9	9	9	4	4	4	4	4	4	4	4	4	4	4	4
4	1377	3	4	4	4	1	1	1	1	1	1	1	1	1	1	1	1	1	1	1	1	1
1	1378	3	1	1	1	1	1	1	1	1	1	1	1	1	1	1	1	1	1	1	1	1
2	1379	3	2	1	2	2	2	2	2	2	2	2	2	2	2	2	2	2	2	2	2	2
3	1380	3	3	3	1	1	1	1	1	1	1	1	1	1	1	1	1	1	1	1	1	1
2	1381	3	2	1	1	1	1	1	1	1	1	1	1	1	1	1	1	1	1	1	1	1
6	1382	3	6	6	6	6	6	2	2	2	2	2	2	2	2	2	2	2	2	2	2	2
8	1383	3	8	8	8	8	8	8	8	1	1	1	1	1	1	1	1	1	1	1	1	1
10	1384	3	10	10	10	10	10	10	10	10	10	1	1	1	1	1	1	1	1	1	1	1
3	1385	3	3	3	2	2	2	2	2	2	2	2	2	2	2	2	2	2	2	2	2	2
1	1386	3	1	1	1	1	1	1	1	1	1	1	1	1	1	1	1	1	1	1	1	1
1	1387	3	1	1	1	1	1	1	1	1	1	1	1	1	1	1	1	1	1	1	1	1
3	1388	3	3	3	1	1	1	1	1	1	1	1	1	1	1	1	1	1	1	1	1	1
2	1389	3	2	2	2	2	2	2	2	2	2	2	2	2	2	2	2	2	2	2	2	2
5	1390	3	5	5	5	5	2	2	2	2	2	2	2	2	2	2	2	2	2	2	2	2
3	1391	3	3	3	2	2	2	2	2	2	2	2	2	2	2	2	2	2	2	2	2	2
6	1392	3	6	6	6	6	6	1	1	2	2	2	2	2	2	2	2	2	2	2	2	2
5	1393	3	5	5	5	5	1	1	2	2	2	2	2	2	2	2	2	2	2	2	2	2
6	1394	3	6	6	6	6	6	1	1	1	1	1	1	1	1	1	1	1	1	1	1	1
1	1395	3	1	1	1	1	1	1	1	1	1	1	1	1	1	1	1	1	1	1	1	1
3	1396	3	3	3	1	1	1	1	1	1	1	1	1	1	1	1	1	1	1	1	1	1
18	1397	3	18	18	18	18	18	18	18	18	18	18	18	18	18	18	18	18	18	1	1	1
4	1398	3	4	4	4	3	4	2	2	2	2	2	2	2	2	2	2	2	2	2	2	2
31	1399	3	31	31	31	31	31	31	31	31	31	31	31	31	31	31	31	31	31	31	31	31
6	1400	3	6	6	6	6	6	1	1	1	1	1	1	1	1	1	1	1	1	1	1	1
13	1401	3	13	13	13	13	13	13	13	13	13	13	13	13	3	3	3	3	3	3	3	3
5	1402	3	5	5	5	5	1	1	1	1	1	1	1	1	1	1	1	1	1	1	1	1
10	1403	3	10	10	10	10	10	10	10	10	10	1	1	1	1	1	1	1	1	1	1	1
6	1404	3	6	6	6	6	6	6	6	6	6	6	6	6	6	6	6	6	6	6	6	6
3	1405	3	3	3	1	2	2	2	2	1	1	1	1	1	1	1	1	1	1	1	1	1
13	1406	3	13	13	13	13	13	13	13	13	13	13	13	13	2	2	2	2	2	2	2	2
8	1407	3	8	8	8	8	8	8	8	1	1	1	1	1	1	1	1	1	1	1	1	1
18	1408	3	18	18	18	18	18	18	18	18	18	18	18	18	18	18	18	18	18	4	4	4
11	1409	3	11	11	11	11	11	11	11	11	11	11	2	2	2	2	2	2	2	2	2	2
37	1410	3	37	37	37	37	37	37	37	37	37	37	37	37	37	37	37	37	37	37	37	37
1	1411	3	1	1	1	1	1	1	1	1	1	1	1	1	1	1	1	1	1	1	1	1
17	1412	3	17	17	17	17	17	17	17	17	17	17	17	17	17	17	17	17	1	1	1	1
13	1413	3	13	13	13	13	13	13	13	13	13	13	13	13	1	1	1	1	1	1	1	1
6	1414	3	6	6	6	6	6	1	1	1	1	1	1	1	1	1	1	1	1	1	1	1
7	1415	3	7	7	7	7	7	7	1	2	2	2	2	2	2	2	2	2	2	2	2	2
3	1416	3	3	3	1	2	2	2	2	2	2	2	2	2	2	2	2	2	2	2	2	2
2	1417	3	2	1	1	1	1	1	1	1	1	1	1	1	1	1	1	1	1	1	1	1
10	1418	3	10	10	10	10	10	10	10	10	10	4	4	4	4	4	4	4	4	4	4	4
4	1419	3	4	4	4	1	2	2	2	2	2	2	2	2	2	2	2	2	2	2	2	2
6	1420	3	6	6	6	6	6	2	2	2	2	2	2	2	2	2	2	2	2	2	2	2
3	1421	3	3	3	3	2	2	2	2	2	2	2	2	2	2	2	2	2	2	2	2	2
21	1422	3	21	21	21	21	21	21	21	21	21	21	21	21	21	21	21	21	21	21	21	21
2	1423	3	2	1	1	1	1	1	1	1	1	1	1	1	1	1	1	1	1	1	1	1
13	1424	3	13	13	13	13	13	13	13	13	13	13	13	13	1	1	1	1	1	1	1	1
2	1425	3	2	1	1	1	1	1	1	1	1	1	1	1	1	1	1	1	1	1	1	1
5	1426	3	5	5	5	5	1	1	1	1	1	1	1	1	1	1	1	1	1	1	1	1
4	1427	3	4	4	4	2	2	2	2	2	2	2	2	2	2	2	2	2	2	2	2	2
10	1428	3	10	10	10	10	10	10	10	10	10	1	1	1	1	1	1	1	1	1	1	1
3	1429	3	3	3	1	1	1	1	1	1	1	1	1	1	1	1	1	1	1	1	1	1
4	1430	3	4	4	4	3	3	3	3	3	3	3	3	3	3	3	3	3	3	3	3	3
1	1431	3	1	2	2	2	2	2	2	2	2	2	2	2	2	2	2	2	2	2	2	2
1	1432	3	1	1	1	1	1	1	1	1	1	1	1	1	1	1	1	1	1	1	1	1
1	1433	3	1	1	1	1	1	1	1	1	1	1	1	1	1	1	1	1	1	1	1	1
1	1434	3	1	1	2	1	1	2	2	2	2	2	2	2	2	2	2	2	2	2	2	2
2	1435	3	2	1	1	1	1	1	1	1	1	1	1	1	1	1	1	1	1	1	1	1
4	1436	3	4	4	4	2	2	2	2	3	3	3	3	3	2	2	2	2	2	2	2	2
59	1437	3	59	59	59	59	59	59	59	59	59	59	59	59	59	59	59	59	59	59	59	59
1	1438	3	1	1	1	1	1	1	1	1	1	1	1	1	1	1	1	1	1	1	1	1
1	1439	3	1	1	1	1	1	1	1	1	1	1	1	1	1	1	1	1	1	1	1	1
1	1440	3	1	2	2	2	1	1	1	1	1	1	2	2	2	2	2	2	2	2	2	2
70	1441	3	70	70	70	70	70	70	70	70	70	70	70	70	70	70	70	70	70	70	70	70
1	1442	3	1	1	1	1	1	1	1	1	1	1	1	1	1	1	1	1	1	1	1	1
2	1443	3	2	2	2	2	2	2	2	2	2	2	2	2	2	2	2	2	2	2	2	2
1	1444	3	1	1	1	1	1	1	1	1	1	1	1	1	1	1	1	1	1	1	1	1
1	1445	3	1	1	1	1	1	1	1	1	1	1	1	1	1	1	1	1	1	1	1	1
1	1446	3	1	1	1	1	1	1	1	1	1	1	1	1	1	1	1	1	1	1	1	1
1	1447	3	1	1	2	2	1	1	1	1	1	1	1	1	1	1	1	1	1	1	1	1
1	1448	3	1	1	1	1	1	1	1	1	1	1	1	1	1	1	1	1	1	1	1	1
23	1449	3	23	23	23	23	23	23	23	23	23	23	23	23	23	23	23	23	23	23	23	23
1	1450	3	1	1	1	1	2	2	2	2	2	2	2	2	2	2	2	2	2	2	2	2
1	1451	3	1	2	2	2	2	2	2	2	2	2	2	2	2	2	2	2	2	2	2	2
7	1452	3	7	7	7	7	7	7	1	1	1	1	1	1	1	1	1	1	1	1	1	1
14	1453	3	14	14	14	14	14	14	14	14	14	14	14	14	14	2	2	2	2	2	2	2
1	1454	3	1	2	2	2	2	2	2	2	2	2	2	2	2	2	2	2	2	2	2	2
1	1455	3	1	1	1	1	1	1	1	1	1	1	1	1	1	1	1	1	1	1	1	1
1	1456	3	1	1	1	1	1	1	1	1	1	1	1	1	1	1	1	1	1	1	1	1
2	1457	3	2	1	1	1	1	1	1	1	1	1	1	1	1	1	1	1	1	1	1	1
2	1458	3	2	1	1	1	1	1	1	1	1	1	1	1	1	1	1	1	1	1	1	1
9	1459	3	9	9	9	9	9	9	9	9	2	2	2	2	2	2	2	2	2	2	2	2
1	1460	3	1	2	2	2	2	2	2	2	2	2	2	2	2	2	2	2	2	2	2	2
16	1461	3	16	16	16	16	16	16	16	16	16	16	16	16	16	16	16	1	1	1	1	1
1	1462	3	1	1	1	1	1	1	1	1	1	1	1	1	1	1	1	1	1	1	1	1
4	1463	3	4	4	4	3	3	3	3	3	3	3	3	3	3	3	3	3	3	3	3	3
3	1464	3	3	3	2	3	4	4	4	4	4	4	4	4	4	4	4	4	4	4	4	4
1	1465	3	1	1	1	1	1	1	1	1	1	1	1	1	1	1	1	1	1	1	1	1
1	1466	3	1	1	1	1	2	2	2	2	2	2	2	2	2	2	3	3	3	3	3	3
37	1467	3	37	37	37	37	37	37	37	37	37	37	37	37	37	37	37	37	37	37	37	37
23	1468	3	23	23	23	23	23	23	23	23	23	23	23	23	23	23	23	23	23	23	23	23
1	1469	3	1	1	1	1	2	2	2	2	2	2	2	2	2	2	2	2	2	2	2	2
1	1470	3	1	1	1	1	1	1	1	1	1	1	1	1	1	1	1	1	1	1	1	1
1	1471	3	1	1	1	1	1	1	1	1	1	1	1	1	1	1	1	1	1	1	1	1
1	1472	3	1	2	2	2	2	2	2	2	2	2	2	2	2	2	2	2	2	2	2	2
4	1473	3	4	4	4	4	4	1	1	2	2	2	2	2	2	2	2	2	2	2	2	2
5	1474	3	5	5	5	5	1	1	1	1	1	1	1	1	1	1	1	1	1	1	1	1
4	1475	3	4	4	4	2	2	2	2	2	2	2	2	2	2	2	2	2	2	2	2	2
5	1476	3	5	5	5	5	1	1	1	1	1	1	1	1	1	1	1	1	1	1	1	1
1	1477	3	1	1	1	1	1	1	1	1	1	1	1	1	1	1	1	1	1	1	1	1
2	1478	3	2	1	1	1	2	2	1	1	1	1	1	1	1	1	1	2	2	2	2	2
4	1479	3	4	4	4	1	1	1	1	1	1	1	1	1	1	1	1	1	1	1	1	1
3	1480	3	3	3	2	2	2	2	2	2	2	2	2	2	2	2	2	2	2	2	2	2
1	1481	3	1	1	1	1	1	1	1	1	1	1	1	1	1	1	1	1	1	1	1	1
1	1482	3	1	1	1	1	1	1	1	1	1	1	1	1	1	1	1	1	1	1	1	1
2	1483	3	2	1	1	1	1	1	1	1	1	1	1	1	1	1	1	1	1	1	1	1
3	1484	3	3	3	1	1	1	1	1	1	1	1	1	1	1	1	1	1	1	1	1	1
1	1485	3	1	2	2	2	2	2	2	2	2	2	2	2	2	2	2	2	2	2	2	2
1	1486	3	1	1	1	1	1	1	1	1	1	1	1	1	1	1	1	1	1	1	1	1
1	1487	3	1	1	1	1	1	1	1	1	1	1	1	1	1	1	1	1	1	1	1	1
1	1488	3	1	1	1	1	1	1	1	1	1	1	1	1	1	1	1	1	1	1	1	1
3	1489	3	3	3	1	1	1	1	1	1	1	1	1	1	1	1	1	1	1	1	1	1
1	1490	3	1	1	1	1	1	1	1	1	1	1	1	1	1	1	1	1	1	1	1	1
2	1491	3	2	1	1	2	2	2	2	2	2	2	2	2	2	2	2	2	2	2	2	2
2	1492	3	2	2	2	2	2	2	2	2	2	2	2	2	2	2	2	2	2	2	2	2
103	1493	3	103	103	103	103	103	103	103	103	103	103	103	103	103	103	103	103	103	103	103	103
11	1494	3	11	11	11	11	11	11	11	11	11	11	5	3	3	3	3	3	3	4	4	3
25	1495	3	25	25	25	25	25	25	25	25	25	25	25	25	25	25	25	25	25	25	25	25
3	1496	3	3	3	1	1	1	1	1	1	1	1	1	1	1	1	1	1	1	1	1	1
44	1497	3	44	44	44	44	44	44	44	44	44	44	44	44	44	44	44	44	44	44	44	44
1	1498	3	1	1	1	1	1	1	1	1	1	1	1	1	1	1	1	1	1	1	1	1
1	1499	3	1	1	1	1	1	1	1	1	1	1	1	1	1	1	1	1	1	1	1	1
1	1500	3	1	1	1	1	1	1	1	1	1	1	1	1	1	1	1	1	1	1	1	1
49	1502	3	49	49	49	49	49	49	49	49	49	49	49	49	49	49	49	49	49	49	49	49
1	1503	3	1	2	1	1	1	1	4	5	6	6	6	6	6	6	6	6	6	6	7	7
26	1504	3	26	26	26	26	26	26	26	26	26	26	26	26	26	26	26	26	26	26	26	26
88	1505	3	88	88	88	88	88	88	88	88	88	88	88	88	88	88	88	88	88	88	88	88
7	1506	3	7	7	7	7	7	7	6	6	6	6	6	7	7	7	7	7	7	7	7	7
1	1507	3	1	1	1	1	1	1	1	1	1	1	1	1	1	1	1	1	1	1	1	1
2	1508	3	2	1	1	1	3	3	3	3	3	3	3	3	3	3	3	3	3	3	3	3
12	1509	3	12	12	12	12	12	12	12	12	12	12	12	3	4	4	4	4	4	4	4	4
9	1510	3	9	9	9	9	9	9	9	9	3	3	4	5	5	5	5	6	6	6	7	7
13	1511	3	13	13	13	13	13	13	13	13	13	13	13	13	13	13	14	15	15	16	17	18
8	1512	3	8	8	8	8	8	8	8	8	8	8	8	9	10	10	10	10	10	10	10	10
3	1513	3	3	3	1	1	1	1	1	1	1	1	1	1	1	1	1	1	1	1	1	1
3	1514	3	3	3	3	3	3	3	3	3	3	3	3	3	3	3	3	3	3	3	3	3
8	1515	3	8	8	8	8	8	8	8	6	6	6	6	6	6	6	6	6	6	6	6	6
3	1516	3	3	3	1	1	1	1	1	1	1	1	1	1	1	1	1	1	1	1	1	1
5	1517	3	5	5	5	5	4	4	5	6	6	6	6	6	6	6	6	6	6	6	6	6
6	1518	3	6	6	6	6	6	6	7	8	8	8	8	8	8	8	8	9	9	9	9	9
19	1519	3	19	19	19	19	19	19	19	19	19	19	19	19	19	19	19	19	19	19	19	19
4	1520	3	4	4	4	1	2	2	2	2	2	2	2	2	2	2	2	2	2	2	2	2
6	1521	3	6	6	6	6	6	1	1	1	1	1	1	1	1	1	1	1	1	1	1	1
4	1522	3	4	4	4	1	1	1	1	1	1	1	1	1	1	1	1	1	1	1	1	1
2	1524	3	2	2	2	2	2	2	2	2	2	2	2	2	2	2	2	2	2	2	2	2
10	1525	3	10	10	10	10	10	10	10	10	10	9	9	9	9	9	9	9	9	9	9	9
3	1526	3	3	3	3	3	3	3	3	3	3	4	4	4	4	4	4	4	4	4	4	4
5	1527	3	5	5	5	5	5	5	5	5	5	5	5	5	5	5	5	5	5	5	5	5
81	1528	3	81	81	81	81	81	81	81	81	81	81	81	81	81	81	81	81	81	81	81	81
15	1529	3	15	15	15	15	15	15	15	15	15	15	15	15	15	15	8	9	9	10	10	10
1	1530	3	1	1	2	2	2	2	2	2	2	2	2	1	1	1	1	1	1	1	1	1
3	1531	3	3	3	3	3	3	3	3	3	3	3	3	3	3	3	3	3	3	3	3	3
33	1532	3	33	33	33	33	33	33	33	33	33	33	33	33	33	33	33	33	33	33	33	33
52	1533	3	52	52	52	52	52	52	52	52	52	52	52	52	52	52	52	52	52	52	52	52
1	1534	3	1	1	1	1	1	1	1	1	1	1	1	1	1	1	1	1	1	1	1	1
13	1535	3	13	13	13	13	13	13	13	13	13	13	13	13	13	14	15	16	17	18	19	19
12	1536	3	12	12	12	12	12	12	12	12	12	12	12	6	6	7	8	10	12	13	14	15
15	1537	3	15	15	15	15	15	15	15	15	15	15	15	15	15	15	1	1	1	1	1	1
4	1538	3	4	4	4	4	4	4	4	4	4	4	4	4	4	4	1	1	1	1	1	1
1	1539	3	1	1	1	1	1	1	1	1	1	1	1	1	1	1	1	1	1	1	1	1
10	1540	3	10	10	10	10	10	10	10	10	10	1	1	1	1	1	1	1	1	1	1	1
13	1541	3	13	13	13	13	13	13	13	13	13	13	13	13	5	5	5	5	5	5	5	5
12	1542	3	12	12	12	12	12	12	12	12	12	12	12	11	12	12	12	12	12	12	12	12
1	1543	3	1	1	1	1	2	3	4	7	7	9	10	1	1	1	1	1	1	1	1	1
10	1545	3	10	10	10	10	10	10	10	10	10	9	10	11	12	12	14	15	15	16	17	18
18	1546	3	18	18	18	18	18	18	18	18	18	18	18	18	18	18	18	18	18	3	3	3
20	1547	3	20	20	20	20	20	20	20	20	20	20	20	20	20	20	20	20	20	20	20	19
41	1549	3	41	41	41	41	41	41	41	41	41	41	41	41	41	41	41	41	41	41	41	41
36	1550	3	36	36	36	36	36	36	36	36	36	36	36	36	36	36	36	36	36	36	36	36
26	1551	3	26	26	26	26	26	26	26	26	26	26	26	26	26	26	26	26	26	26	26	26
5	1552	3	5	5	5	5	4	3	4	5	1	1	1	2	2	2	2	1	1	1	1	1
1	1553	3	1	1	1	1	1	1	1	1	1	1	1	1	1	1	1	1	1	1	1	1
1	1554	3	1	1	1	1	1	1	1	1	1	1	1	1	1	1	1	1	1	1	1	1
3	1555	3	3	3	3	3	4	5	5	6	7	8	9	10	11	11	12	12	12	13	13	13
36	1556	3	36	36	36	36	36	36	36	36	36	36	36	36	36	36	36	36	36	36	36	36
64	1557	3	64	64	64	64	64	64	64	64	64	64	64	64	64	64	64	64	64	64	64	64
12	1558	3	12	12	12	12	12	12	12	12	12	12	12	10	11	11	9	11	9	9	10	9
15	1559	3	15	15	15	15	15	15	15	15	15	15	15	15	15	15	8	8	8	11	12	12
4	1560	3	4	4	4	1	1	1	1	1	1	1	1	1	1	1	1	1	1	1	1	1
1	1561	3	1	1	1	1	1	1	1	1	1	1	1	1	1	1	1	1	1	1	1	1
52	1562	3	52	52	52	52	52	52	52	52	52	52	52	52	52	52	52	52	52	52	52	52
1	1563	3	1	1	2	1	1	1	1	1	1	1	1	1	1	1	1	1	1	1	1	1
2	1564	3	2	1	2	2	2	2	2	2	2	2	2	2	2	2	2	2	2	2	2	2
21	1566	3	21	21	21	21	21	21	21	21	21	21	21	21	21	21	21	21	21	21	21	21
6	1567	3	6	6	6	6	6	6	6	6	8	8	8	8	8	8	8	9	10	10	10	10
1	1568	3	1	1	1	1	1	1	1	1	1	1	1	1	1	1	1	1	1	1	1	1
1	1569	3	1	1	1	1	1	1	1	1	1	1	1	1	1	1	1	1	1	1	1	1
1	1570	3	1	1	1	1	1	1	1	1	1	1	1	1	1	1	1	1	1	1	1	1
1	1571	3	1	1	1	1	1	1	1	1	1	1	1	1	1	1	1	1	1	1	1	1
3	1572	3	3	3	1	2	1	3	3	3	1	1	1	1	1	2	2	2	2	2	2	2
6	1573	3	6	6	6	6	6	3	3	3	3	1	1	1	1	1	1	1	1	1	1	1
9	1574	3	9	9	9	9	9	9	9	9	2	2	2	3	3	3	3	2	2	3	3	3
10	1575	3	10	10	10	10	10	10	10	10	10	3	3	4	4	4	4	4	4	5	5	5
1	1576	3	1	1	2	2	2	2	2	2	2	2	2	2	2	2	2	2	2	2	2	2
2	1577	3	2	1	1	2	2	3	4	4	4	5	5	5	5	6	6	7	8	11	11	11
1	1578	3	1	1	1	1	1	2	2	2	2	2	2	2	2	2	2	2	2	2	2	2
1	1579	3	1	1	1	1	1	1	1	1	1	1	1	1	1	1	1	1	1	1	1	1
6	1580	3	6	6	6	6	6	6	7	7	8	9	9	9	9	9	9	9	9	9	9	9
8	1581	3	8	8	8	8	8	8	8	3	2	2	2	2	3	3	2	2	4	4	4	2
7	1582	3	7	7	7	7	7	7	4	5	5	6	6	6	6	6	7	5	5	5	5	5
24	1583	3	24	24	24	24	24	24	24	24	24	24	24	24	24	24	24	24	24	24	24	24
158	1584	3	158	158	158	158	158	158	158	158	158	158	158	158	158	158	158	158	158	158	158	158
8	1585	3	8	8	8	8	8	8	8	2	3	3	3	3	5	5	5	5	5	5	5	5
5	1586	3	5	5	5	5	4	3	4	4	4	5	5	5	5	5	6	7	7	7	7	7
8	1587	3	8	8	8	8	8	8	8	1	1	1	1	1	1	1	1	1	1	1	1	1
115	1588	3	115	115	115	115	115	115	115	115	115	115	115	115	115	115	115	115	115	115	115	115
9	1589	3	9	9	9	9	9	9	9	9	3	3	3	3	5	5	5	5	5	5	5	4
1	1590	3	1	1	1	1	1	1	1	1	1	1	1	1	1	1	1	1	1	1	1	1
1	1591	3	1	1	1	1	1	1	1	1	1	1	1	1	1	1	1	1	1	1	1	1
49	1592	3	49	49	49	49	49	49	49	49	49	49	49	49	49	49	49	49	49	49	49	49
7	1595	3	7	7	7	7	7	7	1	1	1	1	1	1	1	1	1	1	1	1	1	1
4	1596	3	4	4	4	1	1	3	1	1	1	1	1	1	1	1	1	1	1	1	1	1
4	1597	3	4	4	4	4	1	2	2	2	4	5	5	5	5	6	6	6	7	7	6	4
2	1598	3	2	2	3	4	5	5	5	5	5	5	5	5	5	5	5	5	5	5	5	5
20	1599	3	20	20	20	20	20	20	20	20	20	20	20	20	20	20	20	20	20	20	20	18
20	1601	3	20	20	20	20	20	20	20	20	20	20	20	20	20	20	20	20	20	20	20	6
25	1602	3	25	25	25	25	25	25	25	25	25	25	25	25	25	25	25	25	25	25	25	25
11	1603	3	11	11	11	11	11	11	11	11	11	11	8	9	10	8	8	8	8	8	8	9
10	1604	3	10	10	10	10	10	10	10	10	10	1	1	1	1	1	1	1	1	1	1	1
41	1605	3	41	41	41	41	41	41	41	41	41	41	41	41	41	41	41	41	41	41	41	41
59	1606	3	59	59	59	59	59	59	59	59	59	59	59	59	59	59	59	59	59	59	59	59
83	1607	3	83	83	83	83	83	83	83	83	83	83	83	83	83	83	83	83	83	83	83	83
27	1608	3	27	27	27	27	27	27	27	27	27	27	27	27	27	27	27	27	27	27	27	27
1	1609	3	1	1	1	1	1	1	2	2	2	2	2	2	2	2	2	2	2	2	2	2
44	1610	3	44	44	44	44	44	44	44	44	44	44	44	44	44	44	44	44	44	44	44	44
26	1611	3	26	26	26	26	26	26	26	26	26	26	26	26	26	26	26	26	26	26	26	26
2	1612	3	2	1	2	2	2	2	1	1	1	1	1	1	2	2	2	2	2	2	2	3
1	1613	3	1	1	1	1	1	1	1	1	1	1	1	1	1	1	1	1	1	1	1	1
2	1614	3	2	1	1	1	1	1	1	1	1	1	1	1	1	1	1	1	1	1	1	1
1	1616	3	1	2	3	3	2	3	4	2	3	3	3	3	3	3	3	4	4	5	5	5
20	1617	3	20	20	20	20	20	20	20	20	20	20	20	20	20	20	20	20	20	20	20	20
22	1618	3	22	22	22	22	22	22	22	22	22	22	22	22	22	22	22	22	22	22	22	22
1	1619	3	1	1	1	1	1	1	1	1	1	1	1	1	1	1	1	1	1	1	1	1
1	1620	3	1	1	1	1	1	1	1	1	1	1	1	1	1	1	1	1	1	1	1	1
40	1621	3	40	40	40	40	40	40	40	40	40	40	40	40	40	40	40	40	40	40	40	40
2	1622	3	2	1	1	1	1	1	1	1	1	1	1	1	1	1	1	1	1	1	1	1
1	1623	3	1	1	1	1	1	1	1	1	1	1	1	1	1	1	1	1	1	1	1	1
1	1624	3	1	1	1	1	1	1	1	1	1	1	1	1	1	1	1	1	1	1	1	1
5	1625	3	5	5	5	5	5	5	5	5	5	5	5	5	5	5	5	5	5	5	5	5
6	1626	3	6	6	6	6	6	6	7	8	8	6	6	6	6	6	6	6	6	6	6	6
13	1627	3	13	13	13	13	13	13	13	13	13	13	13	13	7	8	9	10	12	13	14	15
1	1628	3	1	1	1	2	1	1	1	1	1	1	1	1	1	1	1	1	1	2	2	2
1	1629	3	1	1	1	2	1	1	1	1	1	1	1	1	1	1	1	1	1	1	1	1
6	1630	3	6	6	6	6	6	5	5	6	6	6	6	6	6	6	6	7	8	8	8	8
6	1631	3	6	6	6	6	6	4	1	1	1	1	1	1	1	1	1	1	1	1	1	1
1	1632	3	1	1	1	1	1	1	1	1	1	1	1	1	1	1	1	1	1	1	1	2
4	1633	3	4	4	4	1	1	1	1	1	1	1	1	1	1	1	1	1	1	1	1	1
3	1635	3	3	3	2	2	2	2	2	3	3	3	3	3	3	3	3	3	3	3	3	3
8	1636	3	8	8	8	8	8	8	8	8	9	9	10	11	12	13	14	15	16	17	18	19
4	1637	3	4	4	4	4	4	4	4	4	4	4	4	4	4	4	4	4	4	4	4	4
59	1638	3	59	59	59	59	59	59	59	59	59	59	59	59	59	59	59	59	59	59	59	59
1	1639	3	1	1	1	1	1	1	1	1	1	1	1	1	1	1	1	1	1	1	1	1
9	1640	3	9	9	9	9	9	9	9	9	1	1	1	1	1	1	1	1	1	1	1	1
1	1641	3	1	1	1	1	1	1	1	1	1	1	1	1	1	1	1	1	1	1	1	1
4	1642	3	4	4	4	2	1	2	2	2	2	2	2	2	2	2	2	2	2	2	2	2
3	1643	3	3	3	1	1	1	1	1	1	1	1	1	1	1	1	1	1	1	1	1	1
7	1644	3	7	7	7	7	7	7	1	1	1	1	1	1	1	1	1	1	1	1	1	1
2	1646	3	2	1	1	1	1	1	1	1	1	1	1	1	1	1	1	1	1	1	1	1
1	1647	3	1	1	1	1	1	1	1	1	1	1	1	1	1	1	1	1	1	1	1	1
1	1648	3	1	1	1	1	1	1	1	1	1	1	1	1	1	1	1	1	1	1	1	1
7	1649	3	7	7	7	7	7	7	1	1	1	1	1	1	1	1	1	1	1	1	1	1
16	1650	3	16	16	16	16	16	16	16	16	16	16	16	16	16	16	16	1	1	1	1	1
40	1651	3	40	40	40	40	40	40	40	40	40	40	40	40	40	40	40	40	40	40	40	40
1	1652	3	1	1	1	1	1	1	1	1	1	1	1	1	1	1	1	1	1	1	1	1
17	1653	3	17	17	17	17	17	17	17	17	17	17	17	17	17	17	17	17	17	17	17	17
2	1654	3	2	1	1	1	1	1	1	1	1	1	1	1	1	1	1	1	1	1	1	1
1	1655	3	1	1	2	2	1	1	1	1	1	1	1	1	1	1	1	1	1	1	1	1
2	1656	3	2	2	3	4	5	4	4	5	4	4	4	4	4	4	4	4	4	4	4	4
1	1658	3	1	1	1	1	1	1	1	1	1	1	1	1	1	1	1	1	1	1	1	1
1	1659	3	1	1	1	1	1	1	1	1	1	1	1	1	1	1	1	1	1	1	1	1
4	1660	3	4	4	4	4	4	4	4	4	4	4	4	4	4	4	4	4	4	4	4	4
3	1661	3	3	3	1	1	1	1	1	1	1	1	1	1	1	1	1	1	1	1	1	1
5	1662	3	5	5	5	5	2	3	3	3	3	3	3	3	3	3	3	3	3	3	3	3
1	1663	3	1	1	1	1	1	1	1	1	1	1	1	1	1	1	1	1	1	1	1	1
8	1664	3	8	8	8	8	8	8	8	2	4	4	4	4	4	4	4	4	4	4	4	5
1	1665	3	1	1	1	1	1	1	1	1	1	1	1	1	1	1	1	1	1	1	1	1
1	1666	3	1	1	1	1	1	1	1	1	1	1	1	1	1	1	1	1	1	1	1	1
1	1668	3	1	1	1	1	1	1	1	1	1	1	1	1	1	1	1	1	1	1	1	1
1	1669	3	1	1	1	1	1	1	1	1	1	1	1	1	1	1	1	1	1	1	1	1
1	1670	3	1	1	1	1	1	1	1	1	1	1	1	1	1	1	1	1	1	1	1	1
3	1671	3	3	3	3	3	3	3	3	3	3	3	3	3	3	3	3	3	3	3	3	3
12	1672	3	12	12	12	12	12	12	12	12	12	12	12	10	11	11	11	12	13	13	13	13
5	1673	3	5	5	5	5	4	5	6	7	7	7	7	7	7	7	7	7	7	7	7	7
3	1675	3	3	3	3	3	3	3	3	3	3	3	3	3	3	3	3	3	3	3	4	4
5	1676	3	5	5	5	5	1	2	2	2	1	1	1	1	1	1	1	1	1	1	1	1
3	1678	3	3	3	3	3	3	3	3	3	3	3	3	3	3	3	3	3	3	3	3	3
13	1679	3	13	13	13	13	13	13	13	13	13	13	13	13	4	6	6	4	6	6	7	9
1	1680	3	1	1	1	1	1	1	1	1	1	1	1	1	1	1	1	1	1	1	1	1
1	1681	3	1	1	1	1	1	1	1	1	1	1	1	1	1	1	1	1	1	1	1	1
1	1682	3	1	1	1	1	1	1	1	1	1	1	1	1	1	1	1	1	1	1	1	1
7	1683	3	7	7	7	7	7	7	1	1	1	1	1	1	1	1	1	1	1	1	1	1
25	1684	3	25	25	25	25	25	25	25	25	25	25	25	25	25	25	25	25	25	25	25	25
15	1685	3	15	15	15	15	15	15	15	15	15	15	15	15	15	15	11	12	13	2	2	2
4	1686	3	4	4	4	4	4	4	4	4	4	4	4	4	4	4	4	4	4	4	4	4
20	1687	3	20	20	20	20	20	20	20	20	20	20	20	20	20	20	20	20	20	20	20	16
12	1688	3	12	12	12	12	12	12	12	12	12	12	12	1	1	1	1	1	1	1	1	1
1	1689	3	1	2	1	1	1	1	1	1	1	1	1	1	1	1	1	1	1	1	1	1
1	1690	3	1	1	1	1	1	1	1	1	1	1	1	1	1	1	1	2	2	1	1	1
3	1691	3	3	3	2	2	2	2	2	2	2	2	2	2	2	2	2	2	2	2	2	2
1	1692	3	1	1	1	1	1	1	1	1	1	1	1	1	1	1	1	1	1	1	1	1
1	1693	3	1	1	1	1	1	1	1	1	1	1	1	1	1	1	1	1	1	1	1	1
1	1694	3	1	1	1	1	1	1	1	1	1	1	1	1	1	1	1	1	1	1	1	1
1	1695	3	1	2	2	2	2	2	2	2	2	2	2	2	2	2	2	2	2	2	2	2
3	1696	3	3	3	1	1	1	1	1	1	1	1	1	1	1	1	1	1	1	1	1	1
22	1698	3	22	22	22	22	22	22	22	22	22	22	22	22	22	22	22	22	22	22	22	22
5	1699	3	5	5	5	5	1	1	1	1	1	1	1	1	1	1	1	1	1	1	1	1
1	1700	3	1	1	1	1	1	1	1	1	1	1	1	1	1	1	1	1	1	1	1	1
1	1701	3	1	1	1	1	1	1	1	1	1	1	1	1	1	1	1	1	1	1	1	1
8	1702	3	8	8	8	8	8	8	8	7	7	7	7	7	7	7	7	8	8	8	8	8
8	1703	3	8	8	8	8	8	8	8	7	7	8	8	9	10	10	10	10	10	11	11	11
1	1704	3	1	1	1	1	1	1	1	1	1	1	1	1	1	1	1	1	1	1	1	1
7	1705	3	7	7	7	7	7	7	1	1	1	1	1	1	1	1	1	1	1	1	1	1
1	1706	3	1	1	1	1	1	1	1	1	1	1	1	1	1	1	1	1	1	1	1	1
21	1707	3	21	21	21	21	21	21	21	21	21	21	21	21	21	21	21	21	21	21	21	21
39	1708	3	39	39	39	39	39	39	39	39	39	39	39	39	39	39	39	39	39	39	39	39
5	1709	3	5	5	5	5	3	4	5	5	6	7	7	7	7	7	7	7	8	8	8	9
4	1710	3	4	4	4	3	3	3	3	2	2	2	2	3	3	3	3	3	3	3	3	3
51	1711	3	51	51	51	51	51	51	51	51	51	51	51	51	51	51	51	51	51	51	51	51
9	1712	3	9	9	9	9	9	9	9	9	3	3	4	5	6	7	8	9	10	14	15	15
17	1713	3	17	17	17	17	17	17	17	17	17	17	17	17	17	17	17	17	2	2	2	2
8	1714	3	8	8	8	8	8	8	8	6	7	7	7	7	7	7	7	7	7	7	7	7
1	1715	3	1	1	1	1	1	1	1	1	1	1	1	1	1	1	1	1	1	1	1	1
147	1716	3	147	147	147	147	147	147	147	147	147	147	147	147	147	147	147	147	147	147	147	147
20	1717	3	20	20	20	20	20	20	20	20	20	20	20	20	20	20	20	20	20	20	20	4
7	1718	3	7	7	7	7	7	7	2	2	3	3	3	4	4	4	4	4	5	5	5	5
14	1719	3	14	14	14	14	14	14	14	14	14	14	14	14	14	12	13	14	15	15	16	17
36	1720	3	36	36	36	36	36	36	36	36	36	36	36	36	36	36	36	36	36	36	36	36
28	1721	3	28	28	28	28	28	28	28	28	28	28	28	28	28	28	28	28	28	28	28	28
9	1722	3	9	9	9	9	9	9	9	9	3	3	3	4	5	6	10	10	11	12	13	12
1	1723	3	1	1	1	1	1	1	1	1	1	1	1	1	1	1	1	1	1	1	1	1
6	1724	3	6	6	6	6	6	4	5	6	6	6	6	6	6	6	6	6	6	6	6	6
5	1725	3	5	5	5	5	2	2	2	2	2	2	2	2	2	2	2	2	2	2	2	2
3	1726	3	3	3	3	3	3	3	3	3	3	3	3	3	3	3	3	3	3	3	3	3
1	1727	3	1	1	1	1	1	1	1	1	1	1	1	1	1	1	1	1	1	1	1	1
1	1728	3	1	1	1	1	1	1	1	1	1	1	1	1	1	1	1	1	1	1	1	1
1	1729	3	1	1	1	1	1	1	1	1	1	1	1	1	1	1	1	1	1	1	1	1
1	1730	3	1	1	1	1	1	1	1	1	1	1	1	1	1	1	1	1	1	1	1	1
4	1731	3	4	4	4	2	2	2	2	2	2	2	2	2	2	2	2	2	2	2	2	2
49	1732	3	49	49	49	49	49	49	49	49	49	49	49	49	49	49	49	49	49	49	49	49
1	1733	3	1	2	3	3	3	3	3	3	3	4	4	4	4	4	4	4	4	4	4	4
2	1734	3	2	1	2	2	2	2	2	2	2	2	3	3	3	3	3	3	3	3	3	3
3	1735	3	3	3	1	1	1	1	1	1	1	1	1	1	1	1	1	1	1	1	1	1
33	1736	3	33	33	33	33	33	33	33	33	33	33	33	33	33	33	33	33	33	33	33	33
3	1737	3	3	3	2	2	2	2	2	2	2	2	2	2	2	2	2	2	2	2	2	2
2	1738	3	2	1	1	1	3	3	3	3	3	3	3	3	3	3	3	3	3	3	3	3
1	1739	3	1	1	1	2	2	2	1	1	1	1	1	1	1	1	1	1	1	1	1	1
2	1740	3	2	2	3	4	4	4	4	2	1	1	1	1	1	1	1	1	1	1	1	1
59	1741	3	59	59	59	59	59	59	59	59	59	59	59	59	59	59	59	59	59	59	59	59
5	1742	3	5	5	5	5	5	6	7	8	8	8	8	9	9	10	11	12	13	14	15	17
7	1743	3	7	7	7	7	7	7	2	2	2	2	2	2	2	2	2	2	2	2	2	2
11	1744	3	11	11	11	11	11	11	11	11	11	11	11	12	13	14	14	13	13	14	14	14
1	1745	3	1	1	1	1	1	1	1	1	1	1	1	1	1	1	1	1	1	1	1	1
1	1746	3	1	1	1	1	1	1	1	1	1	1	1	1	1	1	1	1	1	1	1	1
1	1747	3	1	1	1	1	1	1	1	1	1	1	1	1	1	1	1	1	1	1	1	1
2	1748	3	2	2	2	2	2	2	1	1	1	1	1	1	1	1	1	1	1	1	1	1
20	1749	3	20	20	20	20	20	20	20	20	20	20	20	20	20	20	20	20	20	20	20	19
10	1750	3	10	10	10	10	10	10	10	10	10	8	9	9	10	10	10	10	10	10	10	10
2	1751	3	2	2	2	2	2	2	2	2	2	2	2	2	2	2	2	2	2	2	2	2
26	1754	3	26	26	26	26	26	26	26	26	26	26	26	26	26	26	26	26	26	26	26	26
2	1755	3	2	1	1	1	1	1	1	1	1	1	1	1	1	1	1	1	1	1	1	1
16	1756	3	16	16	16	16	16	16	16	16	16	16	16	16	16	16	16	9	9	9	9	9
1	1757	3	1	1	1	1	1	1	1	1	1	1	1	1	1	1	1	1	1	1	1	1
1	1758	3	1	1	1	1	2	2	2	2	2	2	2	2	2	2	2	2	2	2	2	2
73	1759	3	73	73	73	73	73	73	73	73	73	73	73	73	73	73	73	73	73	73	73	73
56	1760	3	56	56	56	56	56	56	56	56	56	56	56	56	56	56	56	56	56	56	56	56
3	1761	3	3	3	3	4	1	1	1	1	1	1	1	1	3	3	3	3	3	3	3	3
5	1762	3	5	5	5	5	3	3	3	3	3	3	3	3	4	4	5	5	5	5	5	5
29	1763	3	29	29	29	29	29	29	29	29	29	29	29	29	29	29	29	29	29	29	29	29
10	1764	3	10	10	10	10	10	10	10	10	10	1	1	1	1	1	1	1	1	1	2	2
56	1765	3	56	56	56	56	56	56	56	56	56	56	56	56	56	56	56	56	56	56	56	56
3	1766	3	3	3	2	2	2	2	2	2	2	2	2	2	2	2	2	2	2	2	2	2
120	1769	3	120	120	120	120	120	120	120	120	120	120	120	120	120	120	120	120	120	120	120	120
5	1770	3	5	5	5	5	1	1	3	3	2	3	3	3	3	3	3	3	3	3	3	3
8	1771	3	8	8	8	8	8	8	8	6	7	8	9	7	7	8	8	9	9	9	10	11
15	1772	3	15	15	15	15	15	15	15	15	15	15	15	15	15	15	12	12	12	12	12	12
4	1773	3	4	4	4	2	2	2	2	2	2	2	3	3	5	6	6	6	6	6	6	6
2	1774	3	2	2	2	2	2	2	2	2	2	2	1	1	1	1	2	2	2	2	2	2
1	1775	3	1	1	1	1	1	1	1	1	1	1	1	1	1	1	1	1	1	1	1	1
4	1776	3	4	4	4	2	5	5	5	5	5	5	5	5	5	5	5	5	5	5	5	5
3	1777	3	3	3	1	1	1	1	1	1	1	1	1	1	1	1	1	1	1	1	1	1
1	1778	3	1	1	1	1	1	1	1	1	1	1	1	1	1	1	1	1	1	1	1	1
5	1779	3	5	5	5	5	1	1	1	1	1	1	1	1	1	1	1	1	1	1	1	1
1	1780	3	1	1	1	1	1	1	1	1	1	1	1	1	1	1	1	1	1	1	1	1
1	1781	3	1	1	1	1	1	1	1	1	1	1	1	1	1	1	1	1	1	1	1	1
1	1782	3	1	1	1	1	1	1	1	1	1	1	1	1	1	1	1	1	1	1	1	1
4	1783	3	4	4	4	4	4	4	4	4	4	4	4	4	4	4	4	4	4	4	4	4
1	1784	3	1	1	1	1	1	1	1	1	1	1	1	1	1	1	1	1	1	1	1	1
4	1785	3	4	4	4	4	4	4	4	4	4	4	4	4	4	4	4	4	4	4	4	4
1	1786	3	1	1	1	1	1	1	1	1	1	1	1	1	1	1	1	1	1	1	1	1
9	1787	3	9	9	9	9	9	9	9	9	5	6	7	5	5	5	5	5	5	5	5	4
12	1788	3	12	12	12	12	12	12	12	12	12	12	12	1	1	1	1	1	1	1	1	1
2	1789	3	2	2	1	1	1	1	1	1	1	1	1	1	1	1	1	1	1	1	1	1
27	1790	3	27	27	27	27	27	27	27	27	27	27	27	27	27	27	27	27	27	27	27	27
3	1791	3	3	3	1	1	1	1	1	1	1	1	1	1	1	1	1	1	1	1	1	1
1	1792	3	1	1	1	1	1	1	1	1	1	1	1	1	1	1	1	1	1	1	1	1
10	1793	3	10	10	10	10	10	10	10	10	10	10	11	12	12	13	11	11	12	12	12	12
1	1794	3	1	1	1	1	1	1	1	1	1	1	1	1	1	1	1	1	1	1	1	1
5	1795	3	5	5	5	5	5	5	6	6	6	6	6	6	7	7	7	7	7	7	7	7
17	1796	3	17	17	17	17	17	17	17	17	17	17	17	17	17	17	17	17	2	2	5	5
1	1797	3	1	1	1	1	1	1	1	1	1	1	1	1	1	1	1	1	1	1	1	1
1	1798	3	1	1	1	1	1	1	1	1	1	1	1	1	1	1	1	1	1	1	1	1
6	1799	3	6	6	6	6	6	5	5	8	9	10	11	6	6	6	6	6	6	6	7	7
6	1800	3	6	6	6	6	6	6	5	6	7	8	10	7	7	7	7	7	7	7	8	8
1	1801	3	1	1	1	1	1	1	1	1	1	1	1	1	1	1	1	1	1	1	1	1
1	1802	3	1	1	1	1	1	1	1	1	1	1	1	1	1	1	1	1	1	1	1	1
1	1803	3	1	1	1	1	1	1	1	1	1	1	1	1	1	1	1	1	1	1	1	1
1	1804	3	1	1	1	1	1	1	1	1	1	1	1	1	1	1	1	1	1	1	1	1
2	1805	3	2	2	2	3	3	3	3	3	3	3	3	3	3	3	3	3	3	3	3	3
4	1806	3	4	4	4	4	2	2	2	2	2	2	2	2	2	2	2	2	2	2	2	2
1	1807	3	1	1	1	1	1	1	1	1	1	1	1	1	1	1	1	1	1	1	1	1
3	1808	3	3	3	1	1	1	1	1	1	1	1	1	1	1	1	1	1	1	1	1	1
7	1809	3	7	7	7	7	7	7	3	3	3	3	3	3	3	3	3	3	4	4	4	4
8	1810	3	8	8	8	8	8	8	8	4	4	4	4	4	4	4	4	4	3	3	3	3
4	1811	3	4	4	4	1	1	1	1	2	1	1	1	1	1	1	1	1	1	1	1	1
3	1814	3	3	3	3	4	4	4	4	4	4	4	4	4	4	4	4	4	4	4	4	4
1	1815	3	1	1	1	1	1	1	1	1	1	1	1	1	1	1	1	1	1	1	1	1
6	1816	3	6	6	6	6	6	6	6	6	6	6	6	6	6	6	6	6	6	6	6	6
1	1818	3	1	2	1	1	1	1	2	2	2	2	2	2	2	2	2	2	2	2	2	2
7	1819	3	7	7	7	7	7	7	7	7	7	7	7	7	7	7	7	7	7	7	7	7
2	1821	3	2	1	1	1	1	1	1	1	1	1	1	1	1	1	1	1	1	1	1	1
2	1822	3	2	1	1	1	1	1	1	1	1	1	1	1	1	1	1	1	1	1	1	1
1	1824	3	1	1	1	1	1	1	1	1	1	1	1	1	1	1	1	1	1	1	1	1
1	1825	3	1	1	1	1	1	1	1	1	1	1	1	1	1	1	1	1	1	1	1	1
4	1826	3	4	4	4	1	1	1	1	1	1	1	1	1	1	1	1	1	1	1	1	1
5	1827	3	5	5	5	5	2	2	1	1	1	1	2	2	2	2	2	2	2	2	2	2
3	1828	3	3	3	1	1	1	1	1	1	1	1	1	1	1	1	1	1	1	1	1	1
2	1829	3	2	1	2	2	2	2	2	2	2	2	2	2	2	2	2	2	2	2	2	2
1	1831	4	1	1	1	1	1	1	1	1	1	1	1	1	1	1	1	1	1	1	1	1
27	1832	4	27	27	27	27	27	27	27	27	27	27	27	27	27	27	27	27	27	27	27	27
5	1833	4	5	5	5	5	3	4	4	4	5	6	6	6	6	6	6	6	6	6	6	6
4	1834	4	4	4	4	2	2	2	2	2	2	2	2	2	2	2	2	2	2	2	2	2
21	1836	4	21	21	21	21	21	21	21	21	21	21	21	21	21	21	21	21	21	21	21	21
21	1837	4	21	21	21	21	21	21	21	21	21	21	21	21	21	21	21	21	21	21	21	21
7	1838	4	7	7	7	7	7	7	2	2	2	2	2	2	2	2	2	2	2	2	2	2
44	1839	4	44	44	44	44	44	44	44	44	44	44	44	44	44	44	44	44	44	44	44	44
2	1840	4	2	2	2	2	2	2	2	2	2	2	2	2	2	2	2	2	2	2	2	2
7	1841	4	7	7	7	7	7	7	1	1	1	1	1	1	1	1	1	2	2	2	2	2
11	1842	4	11	11	11	11	11	11	11	11	11	11	1	1	1	1	1	1	1	1	1	1
42	1843	4	42	42	42	42	42	42	42	42	42	42	42	42	42	42	42	42	42	42	42	42
14	1846	4	14	14	14	14	14	14	14	14	14	14	14	14	14	11	11	11	11	11	11	11
4	1847	4	4	4	4	3	4	4	4	4	1	1	1	2	2	2	2	2	2	2	2	2
14	1848	4	14	14	14	14	14	14	14	14	14	14	14	14	14	1	1	1	1	1	1	1
5	1849	4	5	5	5	5	5	4	3	3	3	3	1	2	2	2	2	3	4	4	4	4
50	1850	4	50	50	50	50	50	50	50	50	50	50	50	50	50	50	50	50	50	50	50	50
38	1851	4	38	38	38	38	38	38	38	38	38	38	38	38	38	38	38	38	38	38	38	38
37	1852	4	37	37	37	37	37	37	37	37	37	37	37	37	37	37	37	37	37	37	37	37
5	1853	4	5	5	5	5	2	2	2	2	2	2	2	2	2	2	2	2	2	2	2	2
47	1854	4	47	47	47	47	47	47	47	47	47	47	47	47	47	47	47	47	47	47	47	47
70	1855	4	70	70	70	70	70	70	70	70	70	70	70	70	70	70	70	70	70	70	70	70
1	1856	4	1	1	1	1	1	1	1	1	1	1	1	1	1	1	1	1	1	1	1	1
1	1857	4	1	1	1	1	1	1	1	1	1	1	1	1	1	1	1	1	1	1	1	1
2	1858	4	2	2	2	2	2	2	2	2	1	1	1	1	1	1	1	1	1	1	1	1
9	1859	4	9	9	9	9	9	9	9	9	1	1	1	1	1	1	1	1	1	1	1	1
5	1860	4	5	5	5	5	1	1	1	1	1	1	1	1	1	1	1	1	1	1	1	1
4	1861	4	4	4	4	1	1	1	1	1	1	1	1	1	1	1	1	1	1	1	1	1
6	1862	4	6	6	6	6	6	6	6	6	6	6	6	6	6	6	6	6	6	6	6	6
12	1863	4	12	12	12	12	12	12	12	12	12	12	12	12	12	13	14	15	15	16	16	16
25	1864	4	25	25	25	25	25	25	25	25	25	25	25	25	25	25	25	25	25	25	25	25
2	1865	4	2	2	1	1	1	1	1	1	1	1	1	1	1	1	1	1	1	1	1	1
22	1866	4	22	22	22	22	22	22	22	22	22	22	22	22	22	22	22	22	22	22	22	22
1	1867	4	1	1	1	1	1	1	1	1	1	1	1	1	1	1	1	1	1	1	1	1
31	1868	4	31	31	31	31	31	31	31	31	31	31	31	31	31	31	31	31	31	31	31	31
50	1869	4	50	50	50	50	50	50	50	50	50	50	50	50	50	50	50	50	50	50	50	50
14	1870	4	14	14	14	14	14	14	14	14	14	14	14	14	14	14	15	16	14	14	14	14
4	1871	4	4	4	4	1	1	1	1	1	1	1	1	1	1	1	1	1	1	1	1	1
8	1872	4	8	8	8	8	8	8	8	8	9	10	11	11	11	12	13	14	9	9	9	9
3	1873	4	3	3	2	2	2	2	2	2	2	2	2	2	2	2	2	2	2	2	2	2
15	1874	4	15	15	15	15	15	15	15	15	15	15	15	15	15	15	15	16	17	5	5	5
9	1876	4	9	9	9	9	9	9	9	9	5	5	6	6	6	6	6	6	6	6	6	6
15	1877	4	15	15	15	15	15	15	15	15	15	15	15	15	15	15	7	7	7	8	8	8
1	1878	4	1	1	1	1	1	1	1	1	1	1	1	1	1	1	1	1	1	1	1	1
1	1879	4	1	1	1	2	1	1	1	1	1	1	1	1	1	1	1	1	1	1	1	1
6	1880	4	6	6	6	6	6	1	1	1	1	1	1	1	1	1	1	1	1	1	1	1
1	1881	4	1	1	1	1	1	1	1	1	1	1	1	1	1	1	1	1	1	1	1	1
1	1882	4	1	1	1	1	1	1	1	1	1	1	1	1	1	1	1	1	1	1	1	1
22	1883	4	22	22	22	22	22	22	22	22	22	22	22	22	22	22	22	22	22	22	22	22
6	1884	4	6	6	6	6	6	4	1	1	1	1	1	1	1	1	1	1	1	1	1	1
26	1886	4	26	26	26	26	26	26	26	26	26	26	26	26	26	26	26	26	26	26	26	26
2	1887	4	2	1	1	1	1	1	1	1	1	1	1	1	1	1	1	1	1	1	1	1
29	1888	4	29	29	29	29	29	29	29	29	29	29	29	29	29	29	29	29	29	29	29	29
1	1889	4	1	1	1	1	1	1	1	1	1	1	1	1	1	1	1	1	1	1	1	1
17	1890	4	17	17	17	17	17	17	17	17	17	17	17	17	17	17	17	17	14	14	14	15
4	1891	4	4	4	4	3	3	2	2	2	2	3	4	4	1	1	1	1	1	1	1	1
6	1892	4	6	6	6	6	6	4	4	4	4	3	4	3	2	2	2	2	2	2	2	2
3	1894	4	3	3	3	3	3	3	3	3	3	3	3	3	3	3	3	3	3	3	3	3
2	1895	4	2	1	1	1	1	1	1	1	1	1	1	1	1	1	1	1	1	1	1	1
21	1896	4	21	21	21	21	21	21	21	21	21	21	21	21	21	21	21	21	21	21	21	21
3	1897	4	3	3	2	2	2	1	1	1	1	1	1	1	1	1	1	1	1	1	1	1
15	1898	4	15	15	15	15	15	15	15	15	15	15	15	15	15	15	11	9	11	12	13	13
9	1899	4	9	9	9	9	9	9	9	9	2	3	3	3	4	4	4	4	4	4	4	4
7	1900	4	7	7	7	7	7	7	1	1	1	1	1	1	1	1	1	1	1	1	1	1
3	1902	4	3	3	3	3	3	3	3	4	4	4	4	4	4	4	4	4	4	4	4	4
11	1903	4	11	11	11	11	11	11	11	11	11	11	7	7	8	9	10	5	5	5	5	5
16	1904	4	16	16	16	16	16	16	16	16	16	16	16	16	16	16	16	7	7	7	7	7
2	1905	4	2	2	2	2	2	2	2	2	2	2	2	2	2	2	2	2	2	2	2	2
4	1906	4	4	4	4	4	4	4	5	5	5	5	5	5	5	5	5	6	6	6	6	6
1	1907	4	1	1	1	1	1	1	1	1	1	1	1	1	1	1	1	1	1	1	1	1
3	1908	4	3	3	2	2	2	2	2	2	2	2	2	2	2	2	2	2	2	2	2	2
10	1909	4	10	10	10	10	10	10	10	10	10	1	2	2	2	1	1	1	1	1	1	1
14	1910	4	14	14	14	14	14	14	14	14	14	14	14	14	14	4	4	4	4	4	4	4
8	1911	4	8	8	8	8	8	8	8	3	3	3	3	1	1	1	1	1	1	1	1	1
18	1912	4	18	18	18	18	18	18	18	18	18	18	18	18	18	18	18	18	18	8	8	8
24	1913	4	24	24	24	24	24	24	24	24	24	24	24	24	24	24	24	24	24	24	24	24
40	1914	4	40	40	40	40	40	40	40	40	40	40	40	40	40	40	40	40	40	40	40	40
35	1915	4	35	35	35	35	35	35	35	35	35	35	35	35	35	35	35	35	35	35	35	35
74	1916	4	74	74	74	74	74	74	74	74	74	74	74	74	74	74	74	74	74	74	74	74
2	1917	4	2	2	2	2	1	1	1	1	1	1	1	1	1	1	1	1	1	1	1	1
1	1918	4	1	1	1	1	1	1	1	1	1	1	1	1	1	1	1	1	1	1	1	1
8	1920	4	8	8	8	8	8	8	8	1	1	1	1	1	1	1	1	1	1	1	1	1
23	1921	4	23	23	23	23	23	23	23	23	23	23	23	23	23	23	23	23	23	23	23	23
3	1922	4	3	3	3	4	4	4	4	4	4	4	4	4	4	4	4	4	4	4	4	4
19	1925	4	19	19	19	19	19	19	19	19	19	19	19	19	19	19	19	19	19	19	2	4
1	1928	4	1	2	3	3	3	3	3	3	3	3	3	3	3	3	3	3	3	3	3	3
7	1930	4	7	7	7	7	7	7	2	2	2	2	2	2	2	2	2	3	3	3	3	3
4	1931	4	4	4	4	1	3	4	3	3	3	3	3	3	3	3	4	5	6	6	6	6
3	1932	4	3	3	3	3	3	3	3	3	3	3	3	3	3	3	3	3	3	3	3	3
3	1933	4	3	3	2	2	2	2	2	2	2	2	2	2	2	2	2	2	2	2	2	2
16	1934	4	16	16	16	16	16	16	16	16	16	16	16	16	16	16	16	15	16	17	17	17
83	1935	4	83	83	83	83	83	83	83	83	83	83	83	83	83	83	83	83	83	83	83	83
1	1937	4	1	1	1	1	1	1	1	1	1	1	1	1	1	1	1	1	1	1	1	1
1	1938	4	1	1	1	1	1	1	1	1	1	1	1	1	1	1	1	1	1	1	1	1
1	1939	4	1	1	1	1	1	1	1	1	1	1	1	1	1	1	1	1	1	1	1	1
63	1940	4	63	63	63	63	63	63	63	63	63	63	63	63	63	63	63	63	63	63	63	63
6	1943	4	6	6	6	6	6	1	1	1	1	1	1	1	1	1	1	1	1	1	1	1
1	1944	4	1	1	1	1	1	1	1	1	1	1	1	1	1	1	1	1	1	1	1	1
17	1945	4	17	17	17	17	17	17	17	17	17	17	17	17	17	17	17	17	17	17	17	17
1	1946	4	1	1	1	1	1	1	1	1	1	1	1	1	1	1	1	1	1	1	1	1
48	1947	4	48	48	48	48	48	48	48	48	48	48	48	48	48	48	48	48	48	48	48	48
2	1948	4	2	2	2	3	3	3	3	3	3	3	3	3	3	4	4	4	4	4	4	4
18	1949	4	18	18	18	18	18	18	18	18	18	18	18	18	18	18	18	18	18	9	9	9
2	1950	4	2	1	1	1	1	1	1	1	1	1	1	1	1	1	1	1	1	1	1	1
3	1951	4	3	3	3	3	3	3	3	3	3	3	3	3	3	3	3	3	3	3	3	3
2	1952	4	2	1	1	1	1	1	1	1	1	1	1	1	1	1	1	1	1	1	1	1
4	1954	4	4	4	4	1	1	1	1	1	1	1	1	1	1	1	1	1	1	1	1	1
4	1955	4	4	4	4	1	1	1	1	1	1	1	1	1	1	1	1	1	1	1	1	1
3	1956	4	3	3	3	3	2	1	1	1	1	1	1	1	1	1	1	1	1	1	1	1
6	1957	4	6	6	6	6	6	1	1	1	1	1	1	1	1	1	1	1	1	1	1	1
2	1958	4	2	1	1	1	1	1	1	1	1	2	2	2	2	2	2	2	2	2	2	2
12	1959	4	12	12	12	12	12	12	12	12	12	12	12	12	12	12	12	12	12	12	12	12
1	1960	4	1	1	1	1	1	1	1	1	1	1	1	1	1	1	1	1	1	1	1	1
1	1961	4	1	1	1	1	1	1	1	1	1	1	1	1	1	1	1	1	1	1	1	1
2	1962	4	2	2	1	1	1	1	1	1	1	1	1	1	1	1	1	1	1	1	1	1
3	1963	4	3	3	3	3	4	4	3	3	4	4	4	4	4	5	6	6	6	6	6	6
5	1964	4	5	5	5	5	3	4	4	4	4	4	4	4	4	5	5	5	5	5	5	5
7	1965	4	7	7	7	7	7	7	4	4	6	6	6	6	7	4	5	5	5	5	6	6
13	1966	4	13	13	13	13	13	13	13	13	13	13	13	13	11	1	1	1	1	1	1	1
3	1967	4	3	3	2	2	2	2	2	2	2	2	2	2	2	2	2	2	2	2	2	2
6	1968	4	6	6	6	6	6	6	6	6	6	6	6	6	6	6	6	6	6	6	6	6
1	1969	4	1	2	2	1	1	1	1	1	1	1	1	1	1	1	1	1	1	1	1	1
2	1970	4	2	2	2	2	2	2	2	2	2	2	2	2	2	2	2	2	2	2	2	2
1	1971	4	1	1	1	1	1	1	1	1	1	1	1	1	1	1	1	1	1	1	1	1
15	1972	4	15	15	15	15	15	15	15	15	15	15	15	15	15	15	3	4	4	4	4	4
15	1973	4	15	15	15	15	15	15	15	15	15	15	15	15	15	15	3	3	3	3	3	3
10	1974	4	10	10	10	10	10	10	10	10	10	4	4	4	4	4	4	4	4	4	4	4
22	1975	4	22	22	22	22	22	22	22	22	22	22	22	22	22	22	22	22	22	22	22	22
17	1976	4	17	17	17	17	17	17	17	17	17	17	17	17	17	17	17	17	7	7	7	7
13	1977	4	13	13	13	13	13	13	13	13	13	13	13	13	6	6	6	6	6	6	6	6
7	1978	4	7	7	7	7	7	7	3	3	3	3	3	3	3	3	3	3	3	3	3	3
9	1979	4	9	9	9	9	9	9	9	9	3	3	3	3	3	3	3	3	3	3	3	3
8	1980	4	8	8	8	8	8	8	8	1	1	1	1	1	1	1	1	1	1	1	1	1
3	1981	4	3	3	1	2	2	2	2	2	2	2	2	2	2	2	2	2	2	2	2	2
4	1982	4	4	4	4	1	1	1	1	1	1	1	1	1	1	1	1	1	1	1	1	1
2	1983	4	2	2	2	2	2	2	2	2	2	2	2	2	2	2	2	2	2	2	2	2
2	1984	4	2	1	1	1	1	1	1	1	1	1	1	1	1	1	1	1	1	1	1	1
1	1985	4	1	1	1	1	1	1	1	1	1	1	1	1	1	1	1	1	1	1	1	1
3	1986	4	3	3	1	1	1	1	1	1	1	1	1	1	1	1	1	1	1	1	1	1
1	1987	4	1	1	1	1	1	1	1	1	1	1	1	1	1	1	1	1	1	1	1	1
1	1988	4	1	1	1	1	1	1	1	1	1	1	1	1	1	1	1	1	1	1	1	1
4	1989	4	4	4	4	4	4	4	4	4	4	4	4	4	4	4	4	4	4	4	4	4
5	1990	4	5	5	5	5	5	5	5	5	5	5	5	5	5	5	5	5	5	5	5	5
71	1992	4	71	71	71	71	71	71	71	71	71	71	71	71	71	71	71	71	71	71	71	71
4	1994	4	4	4	4	4	5	6	6	6	6	5	4	4	4	4	4	1	1	1	1	1
2	1995	4	2	1	1	1	2	2	2	1	1	1	1	1	1	1	1	1	1	1	1	1
1	1997	4	1	1	1	1	1	1	1	1	1	1	1	1	1	1	1	1	1	1	1	1
58	1998	4	58	58	58	58	58	58	58	58	58	58	58	58	58	58	58	58	58	58	58	58
57	1999	4	57	57	57	57	57	57	57	57	57	57	57	57	57	57	57	57	57	57	57	57
87	2000	4	87	87	87	87	87	87	87	87	87	87	87	87	87	87	87	87	87	87	87	87
47	2002	4	47	47	47	47	47	47	47	47	47	47	47	47	47	47	47	47	47	47	47	47
88	2003	4	88	88	88	88	88	88	88	88	88	88	88	88	88	88	88	88	88	88	88	88
2	2004	4	2	1	1	1	1	1	1	1	1	1	1	1	1	1	1	1	1	1	1	1
3	2006	4	3	3	1	1	1	1	1	1	1	1	1	1	1	1	1	1	1	1	1	1
2	2007	4	2	2	2	2	2	2	2	2	2	2	2	2	2	2	2	2	2	2	2	2
8	2008	4	8	8	8	8	8	8	8	8	8	8	8	8	8	8	8	8	8	8	8	8
3	2009	4	3	3	3	3	3	3	3	3	3	3	3	3	3	3	3	3	3	3	3	3
1	2010	4	1	1	1	1	1	1	1	1	1	1	1	1	1	1	1	1	1	1	1	1
3	2011	4	3	3	1	3	2	3	3	3	3	3	3	1	2	2	2	2	2	2	2	2
1	2013	4	1	1	1	1	1	1	1	1	1	1	1	1	1	1	1	1	1	1	1	1
61	2014	4	61	61	61	61	61	61	61	61	61	61	61	61	61	61	61	61	61	61	61	61
6	2015	4	6	6	6	6	6	4	4	4	6	7	8	9	10	11	12	13	14	15	16	17
32	2016	4	32	32	32	32	32	32	32	32	32	32	32	32	32	32	32	32	32	32	32	32
1	2017	4	1	1	1	1	1	1	1	1	1	1	1	1	1	1	1	1	1	1	1	1
2	2018	4	2	1	1	1	1	1	1	1	1	1	1	1	1	1	1	1	1	1	1	1
9	2019	4	9	9	9	9	9	9	9	9	9	9	9	9	9	9	9	9	9	9	9	9
21	2020	4	21	21	21	21	21	21	21	21	21	21	21	21	21	21	21	21	21	21	21	21
10	2021	4	10	10	10	10	10	10	10	10	10	2	1	1	1	1	1	1	1	1	1	1
49	2022	4	49	49	49	49	49	49	49	49	49	49	49	49	49	49	49	49	49	49	49	49
68	2023	4	68	68	68	68	68	68	68	68	68	68	68	68	68	68	68	68	68	68	68	68
4	2025	4	4	4	4	3	2	2	3	3	3	3	3	3	3	3	3	3	4	4	4	7
1	2026	4	1	1	1	1	1	1	1	1	1	1	1	1	1	1	1	1	1	1	1	1
1	2027	4	1	1	1	1	1	1	1	1	1	1	1	1	1	1	1	1	1	1	1	1
13	2028	4	13	13	13	13	13	13	13	13	13	13	13	13	3	3	3	3	3	3	3	3
12	2029	4	12	12	12	12	12	12	12	12	12	12	12	1	1	1	1	1	1	1	1	1
5	2030	4	5	5	5	5	1	1	1	1	1	1	1	1	1	1	1	1	1	1	1	1
6	2031	4	6	6	6	6	6	1	1	2	2	2	2	2	2	2	2	2	2	2	2	2
2	2032	4	2	1	2	2	2	2	2	2	2	2	2	2	2	2	2	2	2	2	2	2
3	2033	4	3	3	2	2	2	2	2	2	2	2	2	2	2	2	2	2	2	2	2	2
1	2034	4	1	1	1	1	1	1	1	1	1	1	1	1	1	1	1	1	1	1	1	1
5	2035	4	5	5	5	5	5	6	6	6	6	7	7	1	1	1	1	1	1	1	1	1
12	2036	4	12	12	12	12	12	12	12	12	12	12	12	1	1	1	1	1	1	1	1	1
9	2037	4	9	9	9	9	9	9	9	9	1	1	1	1	1	1	1	1	1	1	1	1
34	2038	4	34	34	34	34	34	34	34	34	34	34	34	34	34	34	34	34	34	34	34	34
1	2039	4	1	1	1	1	1	1	1	1	1	1	1	1	1	1	1	1	1	1	1	1
2	2040	4	2	1	1	1	1	1	1	1	1	1	1	1	1	1	1	1	1	1	1	1
2	2041	4	2	2	2	2	2	2	2	2	2	2	2	2	2	2	2	2	2	2	2	2
1	2042	4	1	2	3	3	3	3	3	3	3	3	3	3	3	3	3	3	3	3	3	3
3	2043	4	3	3	3	3	1	1	1	1	1	1	1	1	1	1	1	1	1	1	1	1
6	2044	4	6	6	6	6	6	5	4	4	4	1	1	1	1	1	1	1	1	1	1	1
2	2045	4	2	2	2	2	2	2	2	2	2	2	2	2	2	2	2	2	2	2	2	2
11	2046	4	11	11	11	11	11	11	11	11	11	11	2	2	2	2	2	2	2	2	2	2
5	2047	4	5	5	5	5	1	1	1	1	1	1	1	1	1	1	1	1	1	1	1	1
10	2048	4	10	10	10	10	10	10	10	10	10	8	9	8	8	6	6	6	6	6	6	6
5	2049	4	5	5	5	5	4	4	5	5	5	5	5	5	5	5	5	5	5	5	5	5
9	2050	4	9	9	9	9	9	9	9	9	4	4	4	4	4	4	4	4	4	4	4	4
1	2051	4	1	1	1	1	1	1	1	5	5	5	1	1	1	1	1	1	1	1	1	1
10	2052	4	10	10	10	10	10	10	10	10	10	2	4	4	4	4	4	4	4	4	4	4
3	2053	4	3	3	2	2	2	2	2	3	3	3	3	3	3	3	3	3	3	3	3	3
8	2054	4	8	8	8	8	8	8	8	3	3	3	3	3	3	3	3	3	3	3	3	3
1	2055	4	1	1	1	1	1	1	1	1	1	1	1	1	1	1	1	1	1	1	1	1
3	2056	4	3	3	3	2	3	1	1	2	2	2	2	2	2	2	2	2	2	2	2	2
18	2057	4	18	18	18	18	18	18	18	18	18	18	18	18	18	18	18	18	18	2	2	2
7	2058	4	7	7	7	7	7	7	3	3	3	3	3	3	3	3	3	3	3	3	3	3
1	2059	4	1	1	1	1	1	1	1	1	1	1	1	1	1	1	1	1	1	1	1	1
5	2060	4	5	5	5	5	1	1	1	1	1	1	1	1	1	1	1	1	2	2	2	2
14	2061	4	14	14	14	14	14	14	14	14	14	14	14	14	14	2	2	2	2	2	2	2
4	2062	4	4	4	4	3	3	1	2	2	2	2	3	3	2	1	1	1	1	1	1	1
4	2063	4	4	4	4	1	1	1	1	1	1	1	1	1	1	1	1	1	1	1	1	1
19	2064	4	19	19	19	19	19	19	19	19	19	19	19	19	19	19	19	19	19	19	2	2
2	2065	4	2	1	1	1	1	1	1	1	1	1	1	1	1	1	1	1	1	1	1	1
10	2066	4	10	10	10	10	10	10	10	10	10	1	1	1	1	1	1	1	1	1	1	1
1	2067	4	1	1	1	1	1	1	1	1	1	1	1	1	1	1	1	1	1	1	1	1
1	2068	4	1	1	1	1	1	1	1	1	1	1	1	1	1	1	1	1	1	1	1	1
1	2069	4	1	1	1	1	1	1	1	1	1	1	1	1	1	1	1	1	1	1	1	1
1	2070	4	1	1	1	1	1	1	1	1	3	3	3	3	3	3	3	3	3	3	3	3
1	2071	4	1	1	1	1	1	1	1	1	1	1	1	1	1	1	1	1	1	1	1	1
1	2072	4	1	1	1	1	1	1	1	1	1	1	1	1	1	1	1	1	1	1	1	1
3	2073	4	3	3	1	1	1	1	1	1	1	1	1	1	1	1	1	1	1	1	1	1
1	2074	4	1	1	1	1	1	1	1	1	1	1	1	1	1	1	1	1	1	1	1	1
2	2075	4	2	1	1	2	3	3	3	3	3	4	4	4	4	4	4	4	4	4	4	4
1	2076	4	1	2	2	2	2	2	2	2	2	2	2	2	2	2	2	2	2	2	2	2
2	2077	4	2	1	1	1	1	1	1	1	1	1	1	1	1	1	1	1	1	1	1	1
13	2078	4	13	13	13	13	13	13	13	13	13	13	13	13	2	2	2	2	2	2	2	2
14	2079	4	14	14	14	14	14	14	14	14	14	14	14	14	14	2	2	2	2	2	2	2
6	2080	4	6	6	6	6	6	2	2	1	1	1	1	2	2	2	2	2	2	2	2	2
1	2081	4	1	1	1	1	1	1	1	1	1	1	1	1	1	1	1	1	1	1	1	1
3	2082	4	3	3	1	1	1	1	1	1	1	1	1	1	1	1	1	1	1	1	1	1
1	2084	4	1	1	1	1	2	2	2	2	2	2	2	2	2	3	3	4	4	4	4	4
1	2085	4	1	1	1	1	2	2	2	3	4	4	4	4	4	4	4	4	4	4	4	4
1	2086	4	1	1	1	1	1	1	2	2	2	2	2	2	2	3	3	3	3	3	3	3
119	2087	4	119	119	119	119	119	119	119	119	119	119	119	119	119	119	119	119	119	119	119	119
3	2088	4	3	3	1	1	1	1	1	1	1	1	1	1	1	1	1	1	1	1	1	1
1	2089	4	1	2	3	4	4	4	4	4	4	4	4	4	4	4	4	4	4	4	4	4
1	2090	4	1	1	1	1	1	1	1	1	1	1	1	1	1	1	1	1	1	1	1	1
1	2091	4	1	1	1	1	1	1	1	1	1	1	1	1	1	1	1	1	1	1	1	1
7	2092	4	7	7	7	7	7	7	1	1	1	1	1	1	1	1	1	1	1	1	1	1
1	2093	4	1	1	1	1	1	1	1	1	1	1	1	1	1	1	1	1	1	1	1	1
2	2095	4	2	1	3	4	4	4	4	4	4	4	4	4	4	4	4	4	4	4	4	4
17	2096	4	17	17	17	17	17	17	17	17	17	17	17	17	17	17	17	17	7	7	7	8
1	2097	4	1	1	1	1	1	1	1	1	1	1	1	1	1	1	1	1	1	1	1	1
2	2098	4	2	1	1	1	1	1	1	1	1	1	1	1	1	1	1	1	1	1	1	1
3	2100	4	3	3	3	3	3	3	3	3	3	3	3	3	3	3	3	3	3	3	3	3
31	2101	4	31	31	31	31	31	31	31	31	31	31	31	31	31	31	31	31	31	31	31	31
1	2102	4	1	1	1	1	1	1	1	1	1	1	1	1	1	1	1	1	1	1	1	1
1	2104	4	1	1	1	1	1	1	1	1	1	1	1	1	1	1	1	1	1	1	1	1
4	2105	4	4	4	4	1	1	1	1	1	1	1	1	1	1	1	1	1	1	1	1	1
2	2106	4	2	2	2	2	2	2	2	2	2	2	2	2	2	2	2	2	2	2	2	2
1	2107	4	1	1	1	1	1	1	1	1	1	1	1	1	1	1	1	1	1	1	1	1
13	2108	4	13	13	13	13	13	13	13	13	13	13	13	13	4	5	5	5	5	5	5	5
10	2109	4	10	10	10	10	10	10	10	10	10	1	1	1	1	1	1	1	1	1	1	1
1	2110	4	1	1	1	1	1	1	1	1	1	1	1	1	1	1	1	1	1	1	1	1
13	2111	4	13	13	13	13	13	13	13	13	13	13	13	13	1	1	1	1	1	1	1	1
1	2112	4	1	1	1	1	1	1	1	1	1	1	1	1	1	1	1	1	1	1	1	1
4	2113	4	4	4	4	4	4	4	4	4	4	4	4	4	4	4	4	4	4	4	4	4
1	2114	4	1	1	1	1	1	1	1	1	1	1	1	1	1	1	1	1	1	1	1	1
7	2115	4	7	7	7	7	7	7	2	3	4	4	4	4	5	5	4	4	5	3	3	3
31	2116	4	31	31	31	31	31	31	31	31	31	31	31	31	31	31	31	31	31	31	31	31
7	2117	4	7	7	7	7	7	7	2	3	3	3	3	3	3	3	3	3	3	3	3	3
8	2118	4	8	8	8	8	8	8	8	3	3	3	3	4	4	4	4	4	4	5	5	5
2	2119	4	2	2	3	3	2	1	1	2	2	2	2	2	2	2	2	2	2	2	2	2
1	2121	4	1	1	1	1	1	1	1	1	1	1	1	1	1	1	1	1	1	1	1	1
23	2122	4	23	23	23	23	23	23	23	23	23	23	23	23	23	23	23	23	23	23	23	23
30	2123	4	30	30	30	30	30	30	30	30	30	30	30	30	30	30	30	30	30	30	30	30
8	2126	4	8	8	8	8	8	8	8	1	1	1	1	1	1	1	1	1	1	1	1	1
14	2128	4	14	14	14	14	14	14	14	14	14	14	14	14	14	1	1	1	1	1	1	1
40	2131	4	40	40	40	40	40	40	40	40	40	40	40	40	40	40	40	40	40	40	40	40
15	2132	4	15	15	15	15	15	15	15	15	15	15	15	15	15	15	15	15	15	15	15	15
2	2133	4	2	1	1	1	1	1	1	1	1	1	1	1	1	1	1	1	1	1	1	1
3	2134	4	3	3	3	3	3	3	3	3	3	3	3	3	3	3	3	3	3	3	3	3
3	2135	4	3	3	3	4	4	4	4	4	4	4	3	3	4	4	4	4	4	4	4	4
2	2137	4	2	1	1	1	2	2	2	1	1	1	1	1	1	1	1	1	1	1	1	1
3	2138	4	3	3	3	3	3	3	3	3	3	3	3	3	3	3	3	3	3	3	3	3
1	2139	4	1	1	1	1	1	1	1	1	1	1	1	1	1	1	1	1	1	1	1	1
12	2140	4	12	12	12	12	12	12	12	12	12	12	12	5	5	5	5	5	5	5	5	5
17	2141	4	17	17	17	17	17	17	17	17	17	17	17	17	17	17	17	17	15	16	16	16
1	2142	4	1	1	1	1	1	1	1	1	1	1	1	1	1	1	1	1	1	1	1	1
2	2143	4	2	2	2	2	2	2	2	2	2	2	2	2	2	2	2	2	2	2	2	2
1	2144	4	1	1	1	1	1	1	1	1	1	1	1	1	1	1	1	1	1	1	1	1
1	2145	4	1	1	1	1	1	1	1	1	1	1	1	1	1	1	1	1	1	1	1	1
1	2146	4	1	2	1	1	1	1	1	1	1	1	1	1	1	1	1	1	1	1	1	1
2	2147	4	2	2	2	1	1	1	1	1	1	1	1	1	1	1	1	1	1	1	1	1
22	2148	4	22	22	22	22	22	22	22	22	22	22	22	22	22	22	22	22	22	22	22	22
34	2149	4	34	34	34	34	34	34	34	34	34	34	34	34	34	34	34	34	34	34	34	34
8	2150	4	8	8	8	8	8	8	8	2	2	2	2	2	2	2	2	2	2	2	2	2
10	2151	4	10	10	10	10	10	10	10	10	10	9	9	10	10	10	11	11	2	3	3	3
8	2152	4	8	8	8	8	8	8	8	2	3	3	4	4	4	4	4	4	4	4	4	4
3	2153	4	3	3	3	3	3	3	3	3	3	3	3	3	3	3	3	3	3	3	3	3
3	2154	4	3	3	2	2	2	2	2	3	2	2	2	2	2	2	2	2	2	2	2	2
9	2155	4	9	9	9	9	9	9	9	9	2	2	2	2	2	2	2	2	2	2	2	2
17	2156	4	17	17	17	17	17	17	17	17	17	17	17	17	17	17	17	17	2	3	3	3
17	2157	4	17	17	17	17	17	17	17	17	17	17	17	17	17	17	17	17	9	9	10	12
87	2158	4	87	87	87	87	87	87	87	87	87	87	87	87	87	87	87	87	87	87	87	87
36	2159	4	36	36	36	36	36	36	36	36	36	36	36	36	36	36	36	36	36	36	36	36
14	2160	4	14	14	14	14	14	14	14	14	14	14	14	14	14	11	12	13	14	15	16	17
12	2161	4	12	12	12	12	12	12	12	12	12	12	12	4	4	4	4	4	4	4	4	4
30	2162	4	30	30	30	30	30	30	30	30	30	30	30	30	30	30	30	30	30	30	30	30
26	2163	4	26	26	26	26	26	26	26	26	26	26	26	26	26	26	26	26	26	26	26	26
1	2164	4	1	1	1	1	1	1	1	1	1	1	1	1	1	1	1	1	1	1	1	1
1	2165	4	1	1	1	1	1	1	1	1	1	1	1	1	1	1	1	1	1	1	1	1
234	2166	4	234	234	234	234	234	234	234	234	234	234	234	234	234	234	234	234	234	234	234	234
19	2167	4	19	19	19	19	19	19	19	19	19	19	19	19	19	19	19	19	19	19	9	9
10	2168	4	10	10	10	10	10	10	10	10	10	3	3	3	3	3	3	4	4	4	4	4
7	2169	4	7	7	7	7	7	7	7	7	7	7	7	7	7	7	7	7	7	7	7	7
5	2170	4	5	5	5	5	3	3	3	2	1	1	1	1	1	1	1	1	1	1	1	1
13	2172	4	13	13	13	13	13	13	13	13	13	13	13	13	11	11	11	11	11	11	12	12
4	2173	4	4	4	4	4	4	5	5	5	5	5	4	3	3	2	3	3	3	3	3	3
30	2174	4	30	30	30	30	30	30	30	30	30	30	30	30	30	30	30	30	30	30	30	30
2	2175	4	2	1	1	1	1	1	1	1	1	1	1	1	1	1	1	1	1	1	1	1
5	2176	4	5	5	5	5	5	5	5	5	5	5	5	5	5	5	5	5	5	5	5	5
2	2177	4	2	1	1	1	1	1	1	1	2	2	2	2	2	2	3	3	3	3	3	3
1	2179	4	1	1	1	1	1	1	2	2	3	4	4	4	4	5	6	7	7	7	7	7
6	2180	4	6	6	6	6	6	2	2	2	2	2	2	2	2	2	2	2	2	2	2	2
80	2181	4	80	80	80	80	80	80	80	80	80	80	80	80	80	80	80	80	80	80	80	80
21	2182	4	21	21	21	21	21	21	21	21	21	21	21	21	21	21	21	21	21	21	21	21
13	2183	4	13	13	13	13	13	13	13	13	13	13	13	13	1	1	1	1	1	3	3	2
[truncated: 3,469 more rows]
