# Supplementary material for: Propagating annotations of molecular networks using in silico fragmentation
Source: PLoS Comput Biol. 2018 Apr 18;14(4):e1006089. doi: 10.1371/journal.pcbi.1006089 (PMC5927460; doi:10.1371/journal.pcbi.1006089)
Supplement: S2 Data — (XLS) [file pcbi.1006089.s003.xls]

## Sheet: mean_median_consensus1to20_reru
S2 Table - Mean and Median ranking position for MetFrag and subsequent Consensus re-ranking of candidate structures.
	MetFrag	c1	c5	c10	c15	c20
mean	14.71099323212	12.2233400402414	10.9623193707701	10.2392537040424	9.84049753063838	9.66380098774465
median	5	3	2	2	2	2
